# Supplementary material for: Metagenomics Versus Metatranscriptomics of the Murine Gut Microbiome for Assessing Microbial Metabolism During Inflammation
Source: Front Microbiol. 2022 Feb 3;13:829378. doi: 10.3389/fmicb.2022.829378 (PMC8851394; doi:10.3389/fmicb.2022.829378)
Supplement: Supplementary file 1 [file Table_1.XLSX]

## Sheet: TableS1
Table S1. Statistical description of libraries generated in this study
Sample name	Experiment	Library type	Number of cycles	Group	Time point	Number quality filtered reads
CA1E	Shotgun metagenomics	paired end	150	Control	end-of-study	1978036
CA1S	Shotgun metagenomics	paired end	150	Control	baseline	5291280
CA2E	Shotgun metagenomics	paired end	150	Control	end-of-study	2345567
CA2S	Shotgun metagenomics	paired end	150	Control	baseline	4591047
CA3E	Shotgun metagenomics	paired end	150	Control	end-of-study	3481950
CA3S	Shotgun metagenomics	paired end	150	Control	baseline	2857679
CA4E	Shotgun metagenomics	paired end	150	Control	end-of-study	2519817
CA4S	Shotgun metagenomics	paired end	150	Control	baseline	5912970
CA5E	Shotgun metagenomics	paired end	150	Control	end-of-study	2044393
CA5S	Shotgun metagenomics	paired end	150	Control	baseline	4026065
CB1E	Shotgun metagenomics	paired end	150	Control	end-of-study	2287126
CB1S	Shotgun metagenomics	paired end	150	Control	baseline	6075340
CB2E	Shotgun metagenomics	paired end	150	Control	end-of-study	2206323
CB2S	Shotgun metagenomics	paired end	150	Control	baseline	6347197
CB3E	Shotgun metagenomics	paired end	150	Control	end-of-study	3160117
CB3S	Shotgun metagenomics	paired end	150	Control	baseline	5881238
CB4E	Shotgun metagenomics	paired end	150	Control	end-of-study	2475456
CB4S	Shotgun metagenomics	paired end	150	Control	baseline	5977769
CB5E	Shotgun metagenomics	paired end	150	Control	end-of-study	2726190
CB5S	Shotgun metagenomics	paired end	150	Control	baseline	5683225
CC1E	Shotgun metagenomics	paired end	150	Control	end-of-study	4096856
CC1S	Shotgun metagenomics	paired end	150	Control	baseline	5702780
CC2E	Shotgun metagenomics	paired end	150	Control	end-of-study	4228236
CC2S	Shotgun metagenomics	paired end	150	Control	baseline	5589945
CC3E	Shotgun metagenomics	paired end	150	Control	end-of-study	4398289
CC3S	Shotgun metagenomics	paired end	150	Control	baseline	4584154
CC4E	Shotgun metagenomics	paired end	150	Control	end-of-study	5734670
CC4S	Shotgun metagenomics	paired end	150	Control	baseline	4581395
CC5E	Shotgun metagenomics	paired end	150	Control	end-of-study	4889160
CC5S	Shotgun metagenomics	paired end	150	Control	baseline	2347712
TA1E	Shotgun metagenomics	paired end	150	DSS	end-of-study	4011496
TA1S	Shotgun metagenomics	paired end	150	DSS	baseline	3393197
TA2E	Shotgun metagenomics	paired end	150	DSS	end-of-study	3330004
TA2S	Shotgun metagenomics	paired end	150	DSS	baseline	4585651
TA3E	Shotgun metagenomics	paired end	150	DSS	end-of-study	4341835
TA3S	Shotgun metagenomics	paired end	150	DSS	baseline	3584330
TA4E	Shotgun metagenomics	paired end	150	DSS	end-of-study	3504617
TA4S	Shotgun metagenomics	paired end	150	DSS	baseline	4360014
TA5E	Shotgun metagenomics	paired end	150	DSS	end-of-study	4446308
TA5S	Shotgun metagenomics	paired end	150	DSS	baseline	2604086
TB1E	Shotgun metagenomics	paired end	150	DSS	end-of-study	3199430
TB1S	Shotgun metagenomics	paired end	150	DSS	baseline	2103275
TB2E	Shotgun metagenomics	paired end	150	DSS	end-of-study	2814710
TB2S	Shotgun metagenomics	paired end	150	DSS	baseline	3129058
TB3E	Shotgun metagenomics	paired end	150	DSS	end-of-study	4507082
TB3S	Shotgun metagenomics	paired end	150	DSS	baseline	4987420
TB4E	Shotgun metagenomics	paired end	150	DSS	end-of-study	4037163
TB4S	Shotgun metagenomics	paired end	150	DSS	baseline	2234653
TB5E	Shotgun metagenomics	paired end	150	DSS	end-of-study	3714280
TB5S	Shotgun metagenomics	paired end	150	DSS	baseline	2722228
TC1E	Shotgun metagenomics	paired end	150	DSS	end-of-study	2701785
TC1S	Shotgun metagenomics	paired end	150	DSS	baseline	4763080
TC2E	Shotgun metagenomics	paired end	150	DSS	end-of-study	3355629
TC2S	Shotgun metagenomics	paired end	150	DSS	baseline	2834365
TC3E	Shotgun metagenomics	paired end	150	DSS	end-of-study	2720101
TC3S	Shotgun metagenomics	paired end	150	DSS	baseline	2285844
TC4E	Shotgun metagenomics	paired end	150	DSS	end-of-study	3244890
TC4S	Shotgun metagenomics	paired end	150	DSS	baseline	1428121
TC5E	Shotgun metagenomics	paired end	150	DSS	end-of-study	3171417
TC5S	Shotgun metagenomics	paired end	150	DSS	baseline	2419422
MT10 (TA5E)	Metatranscriptomics	paired end	150	DSS	end-of-study	4252382
MT11 (CA1E)	Metatranscriptomics	paired end	150	Control	end-of-study	4209127
MT12 (CA2E)	Metatranscriptomics	paired end	150	Control	end-of-study	3123989
MT13 (CA3S)	Metatranscriptomics	paired end	150	Control	baseline	3834761
MT14 (CA4S)	Metatranscriptomics	paired end	150	Control	baseline	3715572
MT16 (CA3E)	Metatranscriptomics	paired end	150	Control	end-of-study	3746404
MT17 (CA4E)	Metatranscriptomics	paired end	150	Control	end-of-study	3902359
MT18 (CB2S)	Metatranscriptomics	paired end	150	Control	baseline	14392822
MT1 (TA1S)	Metatranscriptomics	paired end	150	DSS	baseline	4664423
MT20 (CC3S)	Metatranscriptomics	paired end	150	Control	baseline	2236918
MT22 (CC5S)	Metatranscriptomics	paired end	150	Control	baseline	3546252
MT23 (TB1S)	Metatranscriptomics	paired end	150	DSS	baseline	3865907
MT24 (CB4E)	Metatranscriptomics	paired end	150	Control	end-of-study	8352858
MT25 (CB4S)	Metatranscriptomics	paired end	150	Control	baseline	14796146
MT27 (CB5S)	Metatranscriptomics	paired end	150	Control	baseline	12203200
MT28 (CC1E)	Metatranscriptomics	paired end	150	Control	end-of-study	19847160
MT29 (CC1S)	Metatranscriptomics	paired end	150	Control	baseline	5133302
MT2 (TA2S)	Metatranscriptomics	paired end	150	DSS	baseline	5550050
MT30 (CC3E)	Metatranscriptomics	paired end	150	Control	end-of-study	4028485
MT31 (CC5E)	Metatranscriptomics	paired end	150	Control	end-of-study	4184500
MT33 (CC2S)	Metatranscriptomics	paired end	150	Control	baseline	15027094
MT35 (TB3S)	Metatranscriptomics	paired end	150	DSS	baseline	15396154
MT36 (TB4E)	Metatranscriptomics	paired end	150	DSS	end-of-study	18926033
MT38 (TB5E)	Metatranscriptomics	paired end	150	DSS	end-of-study	14567227
MT39 (TB5S)	Metatranscriptomics	paired end	150	DSS	baseline	6153532
MT3 (TA3S)	Metatranscriptomics	paired end	150	DSS	baseline	5015328
MT40 (TC2E)	Metatranscriptomics	paired end	150	DSS	end-of-study	18875769
MT41 (TC2S)	Metatranscriptomics	paired end	150	DSS	baseline	14900916
MT42 (TC3E)	Metatranscriptomics	paired end	150	DSS	end-of-study	16746123
MT43 (TC3S)	Metatranscriptomics	paired end	150	DSS	baseline	20344345
MT44 (TC4E)	Metatranscriptomics	paired end	150	DSS	end-of-study	13429811
MT45 (TC4S)	Metatranscriptomics	paired end	150	DSS	baseline	15091300
MT46 (TB1E)	Metatranscriptomics	paired end	150	DSS	end-of-study	3495769
MT47 (TC5S)	Metatranscriptomics	paired end	150	DSS	baseline	23937819
MT48 (TC5E)	Metatranscriptomics	paired end	150	DSS	end-of-study	25092078
MT4 (TA1E)	Metatranscriptomics	paired end	150	DSS	end-of-study	4946762
MT5 (TA2E)	Metatranscriptomics	paired end	150	DSS	end-of-study	4408173
MT6 (TA3E)	Metatranscriptomics	paired end	150	DSS	end-of-study	5090543
MT7 (TA5S)	Metatranscriptomics	paired end	150	DSS	baseline	3921726
MT9 (CA2S)	Metatranscriptomics	paired end	150	DSS	baseline	3728645
CA1	RNA-Seq	paired end	75	Control	end-of-study	2363212
CA2	RNA-Seq	paired end	75	Control	end-of-study	3190477
CA3	RNA-Seq	paired end	75	Control	end-of-study	3580600
CA4	RNA-Seq	paired end	75	Control	end-of-study	5162818
CA5	RNA-Seq	paired end	75	Control	end-of-study	2775351
TA1	RNA-Seq	paired end	75	DSS	end-of-study	2888438
TA2	RNA-Seq	paired end	75	DSS	end-of-study	2994547
TA3	RNA-Seq	paired end	75	DSS	end-of-study	2404153
TA4	RNA-Seq	paired end	75	DSS	end-of-study	2890278
TA5	RNA-Seq	paired end	75	DSS	end-of-study	2779623

## Sheet: TableS2
Table S2. Differentially expressed transcripts. Only statistically significant differences are shown (q < 0.05) and cases in which fold change was greater than 2
transcID	baseMean	log2FoldChange	foldChange	lfcSE	stat	pvalue	padj	ensembl_gene_id	external_gene_name	description	reactome_gene	wikigene_description
ENSMUST00000191273.6	43.9824	23.8043	1.46491e+07	3.02758	7.86248	3.76611e-15	1.818e-11	ENSMUSG00000028416	Bag1	BCL2-associated athanogene 1 [Source:MGI Symbol;Acc:MGI:108047]	R-MMU-2262752	BCL2-associated athanogene 1
ENSMUST00000034435.6	34.9269	23.4862	1.17501e+07	3.02794	7.75647	8.7326e-15	3.07961e-11	ENSMUSG00000031957	Ctrb1	chymotrypsinogen B1 [Source:MGI Symbol;Acc:MGI:88559]	R-MMU-1474244	chymotrypsinogen B1
ENSMUST00000060987.14	30.0564	23.2757	1.01552e+07	3.02823	7.68624	1.51519e-14	3.49571e-11	ENSMUSG00000035242	Oaz1	ornithine decarboxylase antizyme 1 [Source:MGI Symbol;Acc:MGI:109433]	R-MMU-1430728	ornithine decarboxylase antizyme 1
ENSMUST00000183272.1	29.4906	23.2478	9.96088e+06	3.02827	7.67694	1.62936e-14	3.49571e-11	ENSMUSG00000057666	Gapdh	glyceraldehyde-3-phosphate dehydrogenase [Source:MGI Symbol;Acc:MGI:95640]	R-MMU-1430728	glyceraldehyde-3-phosphate dehydrogenase
ENSMUST00000082431.3	105.921	10.9526	1981.8	1.41418	7.74485	9.56946e-15	3.07961e-11	ENSMUSG00000042808	Gpx2	glutathione peroxidase 2 [Source:MGI Symbol;Acc:MGI:106609]	R-MMU-212436	glutathione peroxidase 2
ENSMUST00000075433.7	43.3384	9.66627	812.524	1.94399	4.97238	6.61354e-07	0.000128776	ENSMUSG00000058427	Cxcl2	chemokine (C-X-C motif) ligand 2 [Source:MGI Symbol;Acc:MGI:1340094]	R-MMU-162582	chemokine (C-X-C motif) ligand 2
ENSMUST00000098673.4	75.5664	9.55312	751.236	2.03508	4.69422	2.67621e-06	0.000340584	ENSMUSG00000074268	Amy2a5	amylase 2a5 [Source:MGI Symbol;Acc:MGI:88020]	R-MMU-8963743	amylase 2a5
ENSMUST00000069960.11	84.7128	9.26718	616.168	2.00593	4.6199	3.83932e-06	0.000428641	ENSMUSG00000056071	S100a9	S100 calcium binding protein A9 (calgranulin B) [Source:MGI Symbol;Acc:MGI:1338947]	R-MMU-168249	S100 calcium binding protein A9 (calgranulin B)
ENSMUST00000160477.7	26.0025	8.92505	486.08	2.41537	3.6951	0.000219798	0.00793285	ENSMUSG00000021266	Wars	tryptophanyl-tRNA synthetase [Source:MGI Symbol;Acc:MGI:104630]		tryptophanyl-tRNA synthetase
ENSMUST00000146867.1	25.1978	8.88439	472.572	2.35674	3.76978	0.000163389	0.00646491	ENSMUSG00000044533	Rps2	ribosomal protein S2 [Source:MGI Symbol;Acc:MGI:105110]		ribosomal protein S2
ENSMUST00000119438.1	25.2249	8.88176	471.713	2.36788	3.75093	0.000176178	0.00684473	-
ENSMUST00000120135.7	24.8753	8.86514	466.308	1.15328	7.68689	1.50755e-14	3.49571e-11	ENSMUSG00000021457	Syk	spleen tyrosine kinase [Source:MGI Symbol;Acc:MGI:99515]	R-MMU-109582	spleen tyrosine kinase
ENSMUST00000217851.1	23.5324	8.77179	437.09	1.17077	7.49231	6.76711e-14	1.30666e-10	ENSMUSG00000040054	Baz2a	bromodomain adjacent to zinc finger domain, 2A [Source:MGI Symbol;Acc:MGI:2151152]		bromodomain adjacent to zinc finger domain, 2A
ENSMUST00000028881.13	152.344	8.76776	435.87	1.47949	5.92619	3.10053e-09	1.61806e-06	ENSMUSG00000027398	Il1b	interleukin 1 beta [Source:MGI Symbol;Acc:MGI:96543]	R-MMU-1280215	interleukin 1 beta
ENSMUST00000108431.2	21.1694	8.6317	396.643	2.3034	3.74737	0.000178696	0.00690975	ENSMUSG00000017774	Myo1c	myosin IC [Source:MGI Symbol;Acc:MGI:106612]	R-MMU-168249	myosin IC
ENSMUST00000116238.8	20.9431	8.61367	391.719	2.36341	3.6446	0.000267812	0.00914222	ENSMUSG00000037012	Hk1	hexokinase 1 [Source:MGI Symbol;Acc:MGI:96103]	R-MMU-1430728	hexokinase 1
ENSMUST00000163844.7	18.7056	8.4512	349.997	2.30197	3.67129	0.000241325	0.00848769	ENSMUSG00000006932	Ctnnb1	catenin (cadherin associated protein), beta 1 [Source:MGI Symbol;Acc:MGI:88276]	R-MMU-1266738	catenin (cadherin associated protein), beta 1
ENSMUST00000117167.1	16.7045	8.29483	314.045	1.43289	5.78888	7.08558e-09	3.33696e-06	ENSMUSG00000056071	S100a9	S100 calcium binding protein A9 (calgranulin B) [Source:MGI Symbol;Acc:MGI:1338947]	R-MMU-168249	S100 calcium binding protein A9 (calgranulin B)
ENSMUST00000135225.7	15.6644	8.19873	293.808	1.55968	5.25669	1.46672e-07	4.22699e-05	ENSMUSG00000062234	Gak	cyclin G associated kinase [Source:MGI Symbol;Acc:MGI:2442153]	R-MMU-199991	cyclin G associated kinase
ENSMUST00000028838.4	15.1731	8.15615	285.264	1.68912	4.82865	1.37465e-06	0.000213144	ENSMUSG00000027360	Hdc	histidine decarboxylase [Source:MGI Symbol;Acc:MGI:96062]	R-MMU-1430728	histidine decarboxylase
ENSMUST00000001008.5	13.3954	7.97648	251.86	1.76928	4.50831	6.53447e-06	0.000614051	ENSMUSG00000000982	Ccl3	chemokine (C-C motif) ligand 3 [Source:MGI Symbol;Acc:MGI:98260]		chemokine (C-C motif) ligand 3
ENSMUST00000069927.9	65.7474	7.94543	246.497	1.57999	5.02879	4.93593e-07	0.000103595	ENSMUSG00000056054	S100a8	S100 calcium binding protein A8 (calgranulin A) [Source:MGI Symbol;Acc:MGI:88244]	R-MMU-168249	S100 calcium binding protein A8 (calgranulin A)
ENSMUST00000224653.1	12.3543	7.84731	230.29	1.64479	4.77102	1.83293e-06	0.000256464	ENSMUSG00000074886	Grk6	G protein-coupled receptor kinase 6 [Source:MGI Symbol;Acc:MGI:1347078]	R-MMU-162582	G protein-coupled receptor kinase 6
ENSMUST00000130832.7	12.1899	7.83044	227.614	1.69318	4.62468	3.75171e-06	0.000426773	ENSMUSG00000031166	Wdr13	WD repeat domain 13 [Source:MGI Symbol;Acc:MGI:1914661]		WD repeat domain 13
ENSMUST00000175940.1	11.3603	7.72689	211.848	1.64131	4.70777	2.50447e-06	0.000322392	ENSMUSG00000046691	Chtf8	CTF8, chromosome transmission fidelity factor 8 [Source:MGI Symbol;Acc:MGI:2443370]		CTF8, chromosome transmission fidelity factor 8
ENSMUST00000085255.10	11.3069	7.71678	210.369	1.70887	4.51573	6.30995e-06	0.000603162	ENSMUSG00000030447	Cyfip1	cytoplasmic FMR1 interacting protein 1 [Source:MGI Symbol;Acc:MGI:1338801]	R-MMU-162582	cytoplasmic FMR1 interacting protein 1
ENSMUST00000006956.8	176.822	7.68004	205.079	1.38557	5.54286	2.97564e-08	1.06401e-05	ENSMUSG00000040026	Saa3	serum amyloid A 3 [Source:MGI Symbol;Acc:MGI:98223]		serum amyloid A 3
ENSMUST00000177083.7	10.7643	7.66291	202.659	1.12888	6.78805	1.13662e-11	1.291e-08	ENSMUSG00000022377	Asap1	ArfGAP with SH3 domain, ankyrin repeat and PH domain1 [Source:MGI Symbol;Acc:MGI:1342335]	R-MMU-1852241	ArfGAP with SH3 domain, ankyrin repeat and PH domain1
ENSMUST00000034488.3	16.5499	7.64842	200.634	1.65038	4.63433	3.581e-06	0.00041158	ENSMUSG00000047562	Mmp10	matrix metallopeptidase 10 [Source:MGI Symbol;Acc:MGI:97007]	R-MMU-1474244	matrix metallopeptidase 10
ENSMUST00000096766.10	10.222	7.58666	192.226	1.0604	7.15455	8.39466e-13	1.35077e-09	ENSMUSG00000032624	Eml4	echinoderm microtubule associated protein like 4 [Source:MGI Symbol;Acc:MGI:1926048]		echinoderm microtubule associated protein like 4
ENSMUST00000102550.9	9.96334	7.53002	184.825	1.6928	4.44826	8.65688e-06	0.000751595	ENSMUSG00000046671	Mtfr1l	mitochondrial fission regulator 1-like [Source:MGI Symbol;Acc:MGI:1924074]		mitochondrial fission regulator 1-like
ENSMUST00000135052.7	9.69707	7.51923	183.448	1.56371	4.80857	1.52014e-06	0.000224064	-
ENSMUST00000084738.4	9.8096	7.50922	182.18	1.57732	4.76076	1.92863e-06	0.000264112	ENSMUSG00000031024	St5	suppression of tumorigenicity 5 [Source:MGI Symbol;Acc:MGI:108517]	R-MMU-199991	suppression of tumorigenicity 5
ENSMUST00000165980.1	15.0881	7.49645	180.575	2.06955	3.62227	0.000292028	0.00982365	ENSMUSG00000017002	Slpi	secretory leukocyte peptidase inhibitor [Source:MGI Symbol;Acc:MGI:109297]	R-MMU-168249	secretory leukocyte peptidase inhibitor
ENSMUST00000017384.13	8.93766	7.37903	166.46	1.54619	4.7724	1.82045e-06	0.000256464	ENSMUSG00000078676	Casc3	cancer susceptibility candidate 3 [Source:MGI Symbol;Acc:MGI:2179723]	R-MMU-73857	cancer susceptibility candidate 3
ENSMUST00000101249.8	8.6323	7.34154	162.19	1.62051	4.53039	5.88743e-06	0.000577058	ENSMUSG00000020358	Hnrnpab	heterogeneous nuclear ribonucleoprotein A/B [Source:MGI Symbol;Acc:MGI:1330294]		heterogeneous nuclear ribonucleoprotein A/B
ENSMUST00000164553.6	8.69749	7.33985	162	1.64196	4.47019	7.81516e-06	0.000701874	ENSMUSG00000068566	Myadm	myeloid-associated differentiation marker [Source:MGI Symbol;Acc:MGI:1355332]		myeloid-associated differentiation marker
ENSMUST00000153847.1	8.48179	7.29844	157.417	1.9173	3.80662	0.000140877	0.00584988	-
ENSMUST00000034012.9	7.55441	7.1381	140.858	1.59153	4.48504	7.28989e-06	0.000667111	ENSMUSG00000031601	Cnot7	CCR4-NOT transcription complex, subunit 7 [Source:MGI Symbol;Acc:MGI:1298230]	R-MMU-212436	CCR4-NOT transcription complex, subunit 7
ENSMUST00000089052.10	7.01822	7.02978	130.67	1.52021	4.62423	3.75993e-06	0.000426773	ENSMUSG00000070426	Rnf121	ring finger protein 121 [Source:MGI Symbol;Acc:MGI:1922462]		ring finger protein 121
ENSMUST00000028882.1	33.5031	6.92191	121.256	1.63485	4.23398	2.29595e-05	0.00152345	ENSMUSG00000027399	Il1a	interleukin 1 alpha [Source:MGI Symbol;Acc:MGI:96542]	R-MMU-1280215	interleukin 1 alpha
ENSMUST00000102946.7	6.33252	6.87484	117.363	1.55442	4.42277	9.74442e-06	0.000820062	ENSMUSG00000021357	Exoc2	exocyst complex component 2 [Source:MGI Symbol;Acc:MGI:1913732]	R-MMU-1852241	exocyst complex component 2
ENSMUST00000068058.13	8.92496	6.77303	109.367	1.05321	6.43082	1.26919e-10	1.02112e-07	ENSMUSG00000054814	Usp46	ubiquitin specific peptidase 46 [Source:MGI Symbol;Acc:MGI:1916977]		ubiquitin specific peptidase 46
ENSMUST00000115812.9	5.59611	6.71758	105.243	1.58115	4.24852	2.15183e-05	0.0014595	ENSMUSG00000033628	Pik3c3	phosphatidylinositol 3-kinase catalytic subunit type 3 [Source:MGI Symbol;Acc:MGI:2445019]	R-MMU-162582	phosphatidylinositol 3-kinase catalytic subunit type 3
ENSMUST00000071921.12	5.31099	6.65831	101.007	1.49337	4.45858	8.25027e-06	0.000730755	ENSMUSG00000042508	Dmtf1	cyclin D binding myb-like transcription factor 1 [Source:MGI Symbol;Acc:MGI:1344415]		cyclin D binding myb-like transcription factor 1
ENSMUST00000098549.3	210	6.64321	99.9549	1.03813	6.39921	1.56183e-10	1.2063e-07	ENSMUSG00000074195	Clca4b	chloride channel accessory 4B [Source:MGI Symbol;Acc:MGI:2139790]	R-MMU-382551	chloride channel accessory 4B
ENSMUST00000084895.11	5.258	6.59491	96.6641	1.80881	3.646	0.000266359	0.00911901	ENSMUSG00000032812	Arap1	ArfGAP with RhoGAP domain, ankyrin repeat and PH domain 1 [Source:MGI Symbol;Acc:MGI:1916960]	R-MMU-162582	ArfGAP with RhoGAP domain, ankyrin repeat and PH domain 1
ENSMUST00000114671.7	5.01186	6.52814	92.2926	1.64548	3.96732	7.26852e-05	0.00348258	ENSMUSG00000026743	Mllt10	myeloid/lymphoid or mixed-lineage leukemia; translocated to, 10 [Source:MGI Symbol;Acc:MGI:1329038]		myeloid/lymphoid or mixed-lineage leukemia; translocated to, 10
ENSMUST00000041649.6	6.6114	6.40413	84.6903	1.63789	3.91	9.22975e-05	0.00421317	ENSMUSG00000045027	Prss22	protease, serine 22 [Source:MGI Symbol;Acc:MGI:1918085]		protease, serine 22
ENSMUST00000167371.7	4.49932	6.37573	83.0397	1.28315	4.96883	6.73593e-07	0.000128776	ENSMUSG00000024909	Efemp2	epidermal growth factor-containing fibulin-like extracellular matrix protein 2 [Source:MGI Symbol;Acc:MGI:1891209]	R-MMU-1474244	epidermal growth factor-containing fibulin-like extracellular matrix protein 2
ENSMUST00000018765.3	4.43645	6.35866	82.0629	1.70244	3.73502	0.000187702	0.0071146	ENSMUSG00000005800	Mmp8	matrix metallopeptidase 8 [Source:MGI Symbol;Acc:MGI:1202395]	R-MMU-168249	matrix metallopeptidase 8
ENSMUST00000051929.12	4.41386	6.34976	81.5583	1.68056	3.77837	0.000157861	0.00629781	ENSMUSG00000026739	Bmi1	Bmi1 polycomb ring finger oncogene [Source:MGI Symbol;Acc:MGI:88174]	R-MMU-162582	Bmi1 polycomb ring finger oncogene
ENSMUST00000018610.6	109.412	6.27829	77.6162	1.29643	4.84276	1.28047e-06	0.000206038	ENSMUSG00000020826	Nos2	nitric oxide synthase 2, inducible [Source:MGI Symbol;Acc:MGI:97361]	R-MMU-109582	nitric oxide synthase 2, inducible
ENSMUST00000113121.7	4.20678	6.27719	77.5574	1.69797	3.69688	0.000218269	0.00790064	ENSMUSG00000001632	Brpf1	bromodomain and PHD finger containing, 1 [Source:MGI Symbol;Acc:MGI:1926033]	R-MMU-212436	bromodomain and PHD finger containing, 1
ENSMUST00000015394.9	26.1227	6.2503	76.1252	1.23047	5.07961	3.7821e-07	8.39409e-05	ENSMUSG00000050578	Mmp13	matrix metallopeptidase 13 [Source:MGI Symbol;Acc:MGI:1340026]	R-MMU-1474244	matrix metallopeptidase 13
ENSMUST00000164458.8	3.91557	6.23185	75.158	1.4194	4.39047	1.13104e-05	0.000913776	ENSMUSG00000022771	Ppil2	peptidylprolyl isomerase (cyclophilin)-like 2 [Source:MGI Symbol;Acc:MGI:2447857]	R-MMU-109582	peptidylprolyl isomerase (cyclophilin)-like 2
ENSMUST00000163571.7	4.06858	6.2218	74.6361	1.68619	3.68986	0.000224378	0.00802319	ENSMUSG00000068206	Pick1	protein interacting with C kinase 1 [Source:MGI Symbol;Acc:MGI:894645]	R-MMU-112314	protein interacting with C kinase 1
ENSMUST00000117536.7	6.26617	6.21763	74.4207	1.69322	3.67208	0.00024058	0.00847694	ENSMUSG00000029247	Paics	phosphoribosylaminoimidazole carboxylase, phosphoribosylaminoribosylaminoimidazole, succinocarboxamide synthetase [Source:MGI Symbol;Acc:MGI:1914304]	R-MMU-1430728	phosphoribosylaminoimidazole carboxylase, phosphoribosylaminoribosylaminoimidazole, succinocarboxamide synthetase
ENSMUST00000085852.10	4.06795	6.21148	74.1039	1.42594	4.35606	1.32424e-05	0.00101872	ENSMUSG00000058291	Zfp68	zinc finger protein 68 [Source:MGI Symbol;Acc:MGI:1344427]		zinc finger protein 68
ENSMUST00000114127.7	3.19161	5.87149	58.5456	1.28359	4.57426	4.77898e-06	0.000499145	ENSMUSG00000004221	Ikbkg	inhibitor of kappaB kinase gamma [Source:MGI Symbol;Acc:MGI:1338074]	R-MMU-162582	inhibitor of kappaB kinase gamma
ENSMUST00000031327.8	9.39044	5.85889	58.0367	1.30886	4.47634	7.5934e-06	0.000685145	ENSMUSG00000029380	Cxcl1	chemokine (C-X-C motif) ligand 1 [Source:MGI Symbol;Acc:MGI:108068]	R-MMU-162582	chemokine (C-X-C motif) ligand 1
ENSMUST00000113696.7	61.358	5.84644	57.5379	1.20429	4.85469	1.20577e-06	0.000197307	ENSMUSG00000032366	Tpm1	tropomyosin 1, alpha [Source:MGI Symbol;Acc:MGI:98809]	R-MMU-390522	tropomyosin 1, alpha
ENSMUST00000212066.1	2.97362	5.78074	54.9763	1.52418	3.79268	0.00014903	0.00610958	ENSMUSG00000025894	Aasdhppt	aminoadipate-semialdehyde dehydrogenase-phosphopantetheinyl transferase [Source:MGI Symbol;Acc:MGI:1914868]	R-MMU-1430728	aminoadipate-semialdehyde dehydrogenase-phosphopantetheinyl transferase
ENSMUST00000087956.5	4.03289	5.63773	49.7882	1.17587	4.79452	1.63061e-06	0.000233226	ENSMUSG00000079487	Med12	mediator complex subunit 12 [Source:MGI Symbol;Acc:MGI:1926212]	R-MMU-1266738	mediator complex subunit 12
ENSMUST00000022722.6	32.6927	5.6143	48.9862	1.42235	3.9472	7.90717e-05	0.003733	ENSMUSG00000022126	Acod1	aconitate decarboxylase 1 [Source:MGI Symbol;Acc:MGI:103206]		aconitate decarboxylase 1
ENSMUST00000168882.7	5.88345	5.55852	47.1281	1.32602	4.19189	2.7664e-05	0.00175136	ENSMUSG00000025423	Pias2	protein inhibitor of activated STAT 2 [Source:MGI Symbol;Acc:MGI:1096566]	R-MMU-392499	protein inhibitor of activated STAT 2
ENSMUST00000092836.5	8.42436	5.54293	46.6218	1.43429	3.86459	0.000111276	0.00488324	ENSMUSG00000069792	Wfdc17	WAP four-disulfide core domain 17 [Source:MGI Symbol;Acc:MGI:3649773]		WAP four-disulfide core domain 17
ENSMUST00000177585.8	2.56119	5.5338	46.3275	1.18491	4.67022	3.00872e-06	0.000363096	ENSMUSG00000079685	Ulbp1	UL16 binding protein 1 [Source:MGI Symbol;Acc:MGI:1925027]	R-MMU-392499	UL16 binding protein 1
ENSMUST00000171297.1	8.75669	5.38805	41.876	1.29854	4.14931	3.33474e-05	0.00201415	ENSMUSG00000090942	F830016B08Rik	RIKEN cDNA F830016B08 gene [Source:MGI Symbol;Acc:MGI:3588218]		RIKEN cDNA F830016B08 gene
ENSMUST00000065629.5	10.9001	5.15209	35.5576	1.20588	4.27247	1.93323e-05	0.00135249	ENSMUSG00000021585	Cast	calpastatin [Source:MGI Symbol;Acc:MGI:1098236]	R-MMU-1474244	calpastatin
ENSMUST00000225674.1	37.5233	5.14488	35.3805	0.81758	6.29282	3.11748e-10	2.14984e-07	ENSMUSG00000021546	Hnrnpk	heterogeneous nuclear ribonucleoprotein K [Source:MGI Symbol;Acc:MGI:99894]	R-MMU-392499	heterogeneous nuclear ribonucleoprotein K
ENSMUST00000113093.4	19.805	5.04359	32.9816	1.36247	3.70179	0.000214082	0.00780104	ENSMUSG00000029417	Cxcl9	chemokine (C-X-C motif) ligand 9 [Source:MGI Symbol;Acc:MGI:1352449]	R-MMU-162582	chemokine (C-X-C motif) ligand 9
ENSMUST00000198389.4	8.33024	5.01602	32.3574	1.0939	4.58544	4.53037e-06	0.00049422	ENSMUSG00000027708	Dcun1d1	DCN1, defective in cullin neddylation 1, domain containing 1 (S. cerevisiae) [Source:MGI Symbol;Acc:MGI:2150386]	R-MMU-392499	DCN1, defective in cullin neddylation 1, domain containing 1 (S. cerevisiae)
ENSMUST00000173441.7	16.0102	4.96801	31.2982	1.17286	4.23581	2.27726e-05	0.00151626	ENSMUSG00000024338	Psmb8	proteasome (prosome, macropain) subunit, beta type 8 (large multifunctional peptidase 7) [Source:MGI Symbol;Acc:MGI:1346527]	R-MMU-382551	proteasome (prosome, macropain) subunit, beta type 8 (large multifunctional peptidase 7)
ENSMUST00000025263.14	15.7708	4.94402	30.7821	1.3423	3.68325	0.000230281	0.00815871	ENSMUSG00000024401	Tnf	tumor necrosis factor [Source:MGI Symbol;Acc:MGI:104798]	R-MMU-1266738	tumor necrosis factor
ENSMUST00000034171.8	7.07459	4.77036	27.2912	1.18675	4.01969	5.82741e-05	0.00300859	ENSMUSG00000031731	Ap1g1	adaptor protein complex AP-1, gamma 1 subunit [Source:MGI Symbol;Acc:MGI:101919]	R-MMU-1280218	adaptor protein complex AP-1, gamma 1 subunit
ENSMUST00000130547.7	12.6496	4.56564	23.6807	1.17499	3.88569	0.000102038	0.00458199	-
ENSMUST00000022225.11	4.49366	4.49426	22.5376	1.24282	3.61619	0.000298971	0.00998535	ENSMUSG00000021712	Trim23	tripartite motif-containing 23 [Source:MGI Symbol;Acc:MGI:1933161]		tripartite motif-containing 23
ENSMUST00000149944.1	8.06686	4.41591	21.3462	1.20626	3.66084	0.000251388	0.0087303	ENSMUSG00000052270	Fpr2	formyl peptide receptor 2 [Source:MGI Symbol;Acc:MGI:1278319]	R-MMU-162582	formyl peptide receptor 2
ENSMUST00000035065.8	48.019	4.41172	21.2844	1.14584	3.8502	0.000118022	0.00512108	ENSMUSG00000032487	Ptgs2	prostaglandin-endoperoxide synthase 2 [Source:MGI Symbol;Acc:MGI:97798]	R-MMU-1430728	prostaglandin-endoperoxide synthase 2
ENSMUST00000066912.11	28.2346	4.34742	20.3565	1.01068	4.30146	1.69675e-05	0.00123167	ENSMUSG00000054072	Iigp1	interferon inducible GTPase 1 [Source:MGI Symbol;Acc:MGI:1926259]		interferon inducible GTPase 1
ENSMUST00000050785.13	30.3416	4.09173	17.0504	0.871971	4.69251	2.69871e-06	0.000340584	ENSMUSG00000026822	Lcn2	lipocalin 2 [Source:MGI Symbol;Acc:MGI:96757]	R-MMU-382551	lipocalin 2
ENSMUST00000025329.12	59.9763	3.90202	14.9494	0.975215	4.00119	6.30248e-05	0.00316235	ENSMUSG00000050747	Trim15	tripartite motif-containing 15 [Source:MGI Symbol;Acc:MGI:1916347]		tripartite motif-containing 15
ENSMUST00000054002.3	65.9525	3.8514	14.434	0.704577	5.46625	4.59656e-08	1.50432e-05	ENSMUSG00000053113	Socs3	suppressor of cytokine signaling 3 [Source:MGI Symbol;Acc:MGI:1201791]	R-MMU-162582	suppressor of cytokine signaling 3
ENSMUST00000015278.14	23.9646	3.8232	14.1546	0.980708	3.89841	9.68274e-05	0.00438482	ENSMUSG00000015134	Aldh1a3	aldehyde dehydrogenase family 1, subfamily A3 [Source:MGI Symbol;Acc:MGI:1861722]	R-MMU-162582	aldehyde dehydrogenase family 1, subfamily A3
ENSMUST00000213774.1	36.2073	3.60154	12.1387	0.878299	4.10059	4.12104e-05	0.00235983	ENSMUSG00000045392	Olfr1033	olfactory receptor 1033 [Source:MGI Symbol;Acc:MGI:3030867]	R-MMU-162582	olfactory receptor 1033
ENSMUST00000005548.7	24.3685	3.49013	11.2366	0.845455	4.12811	3.65753e-05	0.00215315	ENSMUSG00000005413	Hmox1	heme oxygenase 1 [Source:MGI Symbol;Acc:MGI:96163]	R-MMU-382551	heme oxygenase 1
ENSMUST00000061829.6	62.0037	3.47038	11.0838	0.769866	4.50778	6.55107e-06	0.000614051	ENSMUSG00000051439	Cd14	CD14 antigen [Source:MGI Symbol;Acc:MGI:88318]	R-MMU-168249	CD14 antigen
ENSMUST00000139263.7	25.5492	3.43766	10.8353	0.825005	4.16684	3.08855e-05	0.00190533	ENSMUSG00000027639	Samhd1	SAM domain and HD domain, 1 [Source:MGI Symbol;Acc:MGI:1927468]	R-MMU-1430728	SAM domain and HD domain, 1
ENSMUST00000109246.1	5.54	3.36438	10.2986	0.78608	4.27995	1.86935e-05	0.00133193	ENSMUSG00000039621	Prex1	phosphatidylinositol-3,4,5-trisphosphate-dependent Rac exchange factor 1 [Source:MGI Symbol;Acc:MGI:3040696]	R-MMU-162582	phosphatidylinositol-3,4,5-trisphosphate-dependent Rac exchange factor 1
ENSMUST00000079957.11	16.8149	3.23084	9.38816	0.758782	4.25793	2.06328e-05	0.00141779	ENSMUSG00000058715	Fcer1g	Fc receptor, IgE, high affinity I, gamma polypeptide [Source:MGI Symbol;Acc:MGI:95496]	R-MMU-109582	Fc receptor, IgE, high affinity I, gamma polypeptide
ENSMUST00000022519.14	39.1501	3.11479	8.66252	0.787619	3.95469	7.66344e-05	0.00364466	ENSMUSG00000021950	Anxa8	annexin A8 [Source:MGI Symbol;Acc:MGI:1201374]		annexin A8
ENSMUST00000092378.9	30.0728	3.04529	8.25513	0.789074	3.85932	0.000113702	0.00496713	ENSMUSG00000025575	Cant1	calcium activated nucleotidase 1 [Source:MGI Symbol;Acc:MGI:1923275]	R-MMU-168249	calcium activated nucleotidase 1
ENSMUST00000119880.2	19.2431	3.00811	8.04508	0.755865	3.97969	6.90058e-05	0.00333943	-
ENSMUST00000138160.7	18.13	2.96865	7.82806	0.702171	4.22782	2.35963e-05	0.00154448	-
ENSMUST00000221251.1	141.62	2.95974	7.77983	0.719998	4.11076	3.94359e-05	0.00227984	-
ENSMUST00000109116.2	12.5442	2.95427	7.7504	0.747361	3.95294	7.71974e-05	0.00366242	ENSMUSG00000027514	Zbp1	Z-DNA binding protein 1 [Source:MGI Symbol;Acc:MGI:1927449]	R-MMU-168249	Z-DNA binding protein 1
ENSMUST00000016511.5	37.595	2.94335	7.69195	0.621443	4.73631	2.17639e-06	0.000290898	ENSMUSG00000038751	Ptk6	PTK6 protein tyrosine kinase 6 [Source:MGI Symbol;Acc:MGI:99683]	R-MMU-1640170	PTK6 protein tyrosine kinase 6
ENSMUST00000034214.7	167.45	2.94271	7.68853	0.739137	3.98128	6.85459e-05	0.00332551	ENSMUSG00000031762	Mt2	metallothionein 2 [Source:MGI Symbol;Acc:MGI:97172]	R-MMU-8953897	metallothionein 2
ENSMUST00000216304.1	9.55874	2.88797	7.4023	0.686272	4.2082	2.57411e-05	0.00164581	ENSMUSG00000094588	Olfr898	olfactory receptor 898 [Source:MGI Symbol;Acc:MGI:3030732]		olfactory receptor 898
ENSMUST00000187994.6	68.2325	2.81489	7.03665	0.690867	4.07443	4.61279e-05	0.00255944	ENSMUSG00000075602	Ly6a	lymphocyte antigen 6 complex, locus A [Source:MGI Symbol;Acc:MGI:107527]		lymphocyte antigen 6 complex, locus A
ENSMUST00000062356.6	54.4978	2.79935	6.96125	0.623044	4.49302	7.02217e-06	0.00065188	ENSMUSG00000047945	Marcksl1	MARCKS-like 1 [Source:MGI Symbol;Acc:MGI:97143]		MARCKS-like 1
ENSMUST00000202779.2	35.628	2.73484	6.65686	0.598043	4.57299	4.80817e-06	0.000499145	ENSMUSG00000068587	Mgam	maltase-glucoamylase [Source:MGI Symbol;Acc:MGI:1203495]	R-MMU-168249	maltase-glucoamylase
ENSMUST00000087158.10	84.0283	2.70286	6.5109	0.700913	3.85619	0.000115166	0.00501973	ENSMUSG00000073399	Trim40	tripartite motif-containing 40 [Source:MGI Symbol;Acc:MGI:2684881]		tripartite motif-containing 40
ENSMUST00000111214.3	11.9993	2.68944	6.45064	0.725836	3.7053	0.000211138	0.00772133	ENSMUSG00000073489	Ifi204	interferon activated gene 204 [Source:MGI Symbol;Acc:MGI:96429]	R-MMU-168249	interferon activated gene 204
ENSMUST00000215196.1	108.082	2.57328	5.9516	0.601119	4.28081	1.86216e-05	0.00133172	-
ENSMUST00000027137.10	163.265	2.53893	5.81157	0.616851	4.11595	3.85582e-05	0.00224253	ENSMUSG00000025993	Slc40a1	solute carrier family 40 (iron-regulated transporter), member 1 [Source:MGI Symbol;Acc:MGI:1315204]	R-MMU-382551	solute carrier family 40 (iron-regulated transporter), member 1
ENSMUST00000023248.12	105.763	2.53647	5.80166	0.593428	4.27426	1.91775e-05	0.00135145	ENSMUSG00000075602	Ly6a	lymphocyte antigen 6 complex, locus A [Source:MGI Symbol;Acc:MGI:107527]		lymphocyte antigen 6 complex, locus A
ENSMUST00000000642.10	98.3209	2.50404	5.67273	0.560413	4.46821	7.88758e-06	0.000705099	ENSMUSG00000000628	Hk2	hexokinase 2 [Source:MGI Symbol;Acc:MGI:1315197]	R-MMU-1430728	hexokinase 2
ENSMUST00000087600.9	219.583	2.43064	5.39132	0.474013	5.12778	2.93174e-07	7.02574e-05	ENSMUSG00000058624	Gda	guanine deaminase [Source:MGI Symbol;Acc:MGI:95678]	R-MMU-1430728	guanine deaminase
ENSMUST00000029845.14	59.7429	2.33602	5.04906	0.517486	4.51416	6.35679e-06	0.000604647	ENSMUSG00000028194	Ddah1	dimethylarginine dimethylaminohydrolase 1 [Source:MGI Symbol;Acc:MGI:1916469]	R-MMU-1430728	dimethylarginine dimethylaminohydrolase 1
ENSMUST00000040498.11	21.9193	2.3294	5.02597	0.454657	5.12343	3.00033e-07	7.06505e-05	ENSMUSG00000036492	Rnf39	ring finger protein 39 [Source:MGI Symbol;Acc:MGI:2156378]		ring finger protein 39
ENSMUST00000114608.2	56.8709	2.29568	4.90986	0.463595	4.95191	7.34868e-07	0.000135139	ENSMUSG00000036617	Etl4	enhancer trap locus 4 [Source:MGI Symbol;Acc:MGI:95454]		enhancer trap locus 4
ENSMUST00000051241.6	60.9079	2.27284	4.83272	0.535002	4.24828	2.15422e-05	0.0014595	ENSMUSG00000044786	Zfp36	zinc finger protein 36 [Source:MGI Symbol;Acc:MGI:99180]		zinc finger protein 36
ENSMUST00000025602.2	58.8388	2.21363	4.63841	0.499306	4.43342	9.27519e-06	0.000795976	ENSMUSG00000024697	Gna14	guanine nucleotide binding protein, alpha 14 [Source:MGI Symbol;Acc:MGI:95769]	R-MMU-109582	guanine nucleotide binding protein, alpha 14
ENSMUST00000216743.1	62.7361	2.18507	4.5475	0.543796	4.01819	5.86477e-05	0.00301981	-
ENSMUST00000193337.1	237.297	2.12501	4.36207	0.541576	3.92376	8.71793e-05	0.0040368	ENSMUSG00000074445	Sprr2a3	small proline-rich protein 2A3 [Source:MGI Symbol;Acc:MGI:3845028]		small proline-rich protein 2A3
ENSMUST00000057725.9	47.8853	2.11383	4.32838	0.536298	3.94152	8.0968e-05	0.00380392	ENSMUSG00000027639	Samhd1	SAM domain and HD domain, 1 [Source:MGI Symbol;Acc:MGI:1927468]	R-MMU-1430728	SAM domain and HD domain, 1
ENSMUST00000023810.11	77.7287	2.07947	4.22652	0.509363	4.0825	4.45547e-05	0.00248644	ENSMUSG00000023048	Prr13	proline rich 13 [Source:MGI Symbol;Acc:MGI:1913401]		proline rich 13
ENSMUST00000084509.4	297.989	2.07764	4.22116	0.457712	4.53918	5.64729e-06	0.00056208	ENSMUSG00000047517	Dmbt1	deleted in malignant brain tumors 1 [Source:MGI Symbol;Acc:MGI:106210]	R-MMU-392499	deleted in malignant brain tumors 1
ENSMUST00000030964.5	165.573	2.07186	4.20428	0.497976	4.16056	3.17468e-05	0.00193987	ENSMUSG00000029084	Cd38	CD38 antigen [Source:MGI Symbol;Acc:MGI:107474]	R-MMU-1430728	CD38 antigen
ENSMUST00000090872.6	696.192	2.02499	4.06988	0.530463	3.8174	0.000134867	0.00564891	ENSMUSG00000074445	Sprr2a3	small proline-rich protein 2A3 [Source:MGI Symbol;Acc:MGI:3845028]		small proline-rich protein 2A3
ENSMUST00000150819.2	49.7836	2.0248	4.06935	0.49391	4.09952	4.14001e-05	0.00235983	ENSMUSG00000034382	AI661453	expressed sequence AI661453 [Source:MGI Symbol;Acc:MGI:2146908]		expressed sequence AI661453
ENSMUST00000039516.3	83.2736	2.0079	4.02197	0.504319	3.98142	6.85054e-05	0.00332551	ENSMUSG00000035105	Egln3	egl-9 family hypoxia-inducible factor 3 [Source:MGI Symbol;Acc:MGI:1932288]	R-MMU-2262752	egl-9 family hypoxia-inducible factor 3
ENSMUST00000076623.7	27.7543	2.00684	4.01902	0.525422	3.81949	0.000133728	0.00561336	ENSMUSG00000037999	Arap2	ArfGAP with RhoGAP domain, ankyrin repeat and PH domain 2 [Source:MGI Symbol;Acc:MGI:2684416]	R-MMU-162582	ArfGAP with RhoGAP domain, ankyrin repeat and PH domain 2
ENSMUST00000003635.6	27.8197	2.004	4.01111	0.518099	3.868	0.000109734	0.00485975	ENSMUSG00000003541	Ier3	immediate early response 3 [Source:MGI Symbol;Acc:MGI:104814]	R-MMU-162582	immediate early response 3
ENSMUST00000082419.1	24733	1.92934	3.80882	0.492134	3.92036	8.84175e-05	0.00407459	ENSMUSG00000064368	mt-Nd6	mitochondrially encoded NADH dehydrogenase 6 [Source:MGI Symbol;Acc:MGI:102495]	R-MMU-1428517	NADH dehydrogenase subunit 6
ENSMUST00000027966.13	5.80366	1.91265	3.76499	0.510226	3.74863	0.000177806	0.00689407	ENSMUSG00000026656	Fcgr2b	Fc receptor, IgG, low affinity IIb [Source:MGI Symbol;Acc:MGI:95499]	R-MMU-168249	Fc receptor, IgG, low affinity IIb
ENSMUST00000020308.4	46.3979	1.90336	3.74083	0.42741	4.45324	8.45856e-06	0.000739033	ENSMUSG00000020108	Ddit4	DNA-damage-inducible transcript 4 [Source:MGI Symbol;Acc:MGI:1921997]	R-MMU-212436	DNA-damage-inducible transcript 4
ENSMUST00000031264.11	832.713	1.89981	3.73163	0.459536	4.13418	3.56222e-05	0.00210996	ENSMUSG00000029322	Plac8	placenta-specific 8 [Source:MGI Symbol;Acc:MGI:2445289]	R-MMU-168249	placenta-specific 8
ENSMUST00000097874.8	45.9956	1.87503	3.6681	0.509476	3.68032	0.000232945	0.00823797	ENSMUSG00000028793	Rnf19b	ring finger protein 19B [Source:MGI Symbol;Acc:MGI:1922484]	R-MMU-1280218	ring finger protein 19B
ENSMUST00000206084.1	46.4847	1.87279	3.6624	0.494162	3.78983	0.000150752	0.00612816	ENSMUSG00000030538	Cib1	calcium and integrin binding 1 (calmyrin) [Source:MGI Symbol;Acc:MGI:1344418]		calcium and integrin binding 1 (calmyrin)
ENSMUST00000045744.6	95.084	1.86345	3.63877	0.473508	3.93542	8.30514e-05	0.00388291	ENSMUSG00000034917	Tjp3	tight junction protein 3 [Source:MGI Symbol;Acc:MGI:1351650]		tight junction protein 3
ENSMUST00000138900.7	45.6983	1.86206	3.63525	0.393207	4.73556	2.18448e-06	0.000290898	-
ENSMUST00000221397.1	1248.67	1.85154	3.60885	0.434297	4.26329	2.01436e-05	0.00139409	ENSMUSG00000002804	Nudt14	nudix (nucleoside diphosphate linked moiety X)-type motif 14 [Source:MGI Symbol;Acc:MGI:1913424]	R-MMU-392499	nudix (nucleoside diphosphate linked moiety X)-type motif 14
ENSMUST00000093801.9	31.1362	1.84625	3.59564	0.405379	4.55438	5.25415e-06	0.000530439	ENSMUSG00000032369	Plscr1	phospholipid scramblase 1 [Source:MGI Symbol;Acc:MGI:893575]		phospholipid scramblase 1
ENSMUST00000187117.1	126983	1.84241	3.58608	0.502088	3.66949	0.000243032	0.0085322	-
ENSMUST00000110087.8	18.3972	1.83352	3.56406	0.428647	4.27746	1.89035e-05	0.00134194	ENSMUSG00000037946	Fgd3	FYVE, RhoGEF and PH domain containing 3 [Source:MGI Symbol;Acc:MGI:1353657]	R-MMU-162582	FYVE, RhoGEF and PH domain containing 3
ENSMUST00000103075.10	32.5021	1.79697	3.4749	0.393099	4.57129	4.84724e-06	0.000499451	ENSMUSG00000034187	Nsf	N-ethylmaleimide sensitive fusion protein [Source:MGI Symbol;Acc:MGI:104560]	R-MMU-112314	N-ethylmaleimide sensitive fusion protein
ENSMUST00000017090.5	45.9261	1.79603	3.47264	0.333719	5.38187	7.37174e-08	2.29582e-05	ENSMUSG00000016946	Kctd5	potassium channel tetramerisation domain containing 5 [Source:MGI Symbol;Acc:MGI:1916509]		potassium channel tetramerisation domain containing 5
ENSMUST00000124830.2	121.984	1.7868	3.45049	0.479169	3.72896	0.000192272	0.00716715	ENSMUSG00000054889	Dsp	desmoplakin [Source:MGI Symbol;Acc:MGI:109611]	R-MMU-1266738	desmoplakin
ENSMUST00000047168.11	107.69	1.75605	3.37771	0.445472	3.94199	8.08067e-05	0.00380392	ENSMUSG00000041119	Pde9a	phosphodiesterase 9A [Source:MGI Symbol;Acc:MGI:1277179]	R-MMU-109582	phosphodiesterase 9A
ENSMUST00000026062.9	107.28	1.72702	3.31043	0.43283	3.99006	6.60572e-05	0.0032302	ENSMUSG00000025076	Casp7	caspase 7 [Source:MGI Symbol;Acc:MGI:109383]	R-MMU-109581	caspase 7
ENSMUST00000163279.5	52.5721	1.71306	3.27856	0.328768	5.21055	1.88283e-07	5.04938e-05	ENSMUSG00000037062	Sh3glb1	SH3-domain GRB2-like B1 (endophilin) [Source:MGI Symbol;Acc:MGI:1859730]		SH3-domain GRB2-like B1 (endophilin)
ENSMUST00000164957.7	270.52	1.70577	3.26203	0.434116	3.9293	8.51926e-05	0.00396382	ENSMUSG00000023048	Prr13	proline rich 13 [Source:MGI Symbol;Acc:MGI:1913401]		proline rich 13
ENSMUST00000003135.13	85.0641	1.68262	3.21011	0.416595	4.03899	5.3682e-05	0.0028167	ENSMUSG00000003051	Elf3	E74-like factor 3 [Source:MGI Symbol;Acc:MGI:1101781]		E74-like factor 3
ENSMUST00000034756.14	928.635	1.66658	3.17462	0.42945	3.88074	0.00010414	0.0046547	ENSMUSG00000032231	Anxa2	annexin A2 [Source:MGI Symbol;Acc:MGI:88246]	R-MMU-168249	annexin A2
ENSMUST00000099946.5	387.413	1.63805	3.11245	0.405076	4.04381	5.25905e-05	0.00279744	ENSMUSG00000021215	Net1	neuroepithelial cell transforming gene 1 [Source:MGI Symbol;Acc:MGI:1927138]	R-MMU-162582	neuroepithelial cell transforming gene 1
ENSMUST00000114964.7	44.8513	1.62774	3.09029	0.396493	4.10535	4.03705e-05	0.00232691	ENSMUSG00000061751	Kalrn	kalirin, RhoGEF kinase [Source:MGI Symbol;Acc:MGI:2685385]	R-MMU-1266738	kalirin, RhoGEF kinase
ENSMUST00000076587.4	240.262	1.62739	3.08953	0.33705	4.82833	1.37685e-06	0.000213144	ENSMUSG00000026064	Ptp4a1	protein tyrosine phosphatase 4a1 [Source:MGI Symbol;Acc:MGI:1277096]		protein tyrosine phosphatase 4a1
ENSMUST00000098230.10	41.2628	1.60498	3.04191	0.334157	4.80306	1.56257e-06	0.000226854	ENSMUSG00000073982	Rhog	ras homolog family member G [Source:MGI Symbol;Acc:MGI:1928370]	R-MMU-1266738	ras homolog family member G
ENSMUST00000029515.4	234.982	1.60497	3.04189	0.409011	3.92402	8.70844e-05	0.0040368	ENSMUSG00000027907	S100a11	S100 calcium binding protein A11 [Source:MGI Symbol;Acc:MGI:1338798]	R-MMU-168249	S100 calcium binding protein A11
ENSMUST00000023143.13	201.786	1.58767	3.00563	0.421719	3.76476	0.000166711	0.00656945	ENSMUSG00000022500	Litaf	LPS-induced TN factor [Source:MGI Symbol;Acc:MGI:1929512]		LPS-induced TN factor
ENSMUST00000036854.3	215.393	1.58555	3.00122	0.346374	4.57757	4.70412e-06	0.000499145	ENSMUSG00000040659	Efhd2	EF hand domain containing 2 [Source:MGI Symbol;Acc:MGI:106504]		EF hand domain containing 2
ENSMUST00000185752.1	280.902	1.56312	2.95492	0.407067	3.83996	0.000123056	0.00526851	ENSMUSG00000003051	Elf3	E74-like factor 3 [Source:MGI Symbol;Acc:MGI:1101781]		E74-like factor 3
ENSMUST00000047922.2	73.9762	1.56187	2.95236	0.40845	3.82389	0.000131362	0.00554298	ENSMUSG00000034919	Ttc22	tetratricopeptide repeat domain 22 [Source:MGI Symbol;Acc:MGI:3045307]		tetratricopeptide repeat domain 22
ENSMUST00000032927.13	109.822	1.53969	2.90731	0.411385	3.74269	0.000182063	0.00700259	ENSMUSG00000030688	Stard10	START domain containing 10 [Source:MGI Symbol;Acc:MGI:1860093]	R-MMU-1430728	START domain containing 10
ENSMUST00000050918.3	149.884	1.53165	2.89116	0.287106	5.33477	9.56661e-08	2.93209e-05	ENSMUSG00000046447	Camk2n1	calcium/calmodulin-dependent protein kinase II inhibitor 1 [Source:MGI Symbol;Acc:MGI:1913509]		calcium/calmodulin-dependent protein kinase II inhibitor 1
ENSMUST00000027232.13	199.4	1.51246	2.85296	0.397723	3.80279	0.000143076	0.00591574	ENSMUSG00000026064	Ptp4a1	protein tyrosine phosphatase 4a1 [Source:MGI Symbol;Acc:MGI:1277096]		protein tyrosine phosphatase 4a1
ENSMUST00000030360.10	52.4716	1.50053	2.82947	0.364882	4.11238	3.91607e-05	0.00227073	ENSMUSG00000028617	Lrrc42	leucine rich repeat containing 42 [Source:MGI Symbol;Acc:MGI:1925059]		leucine rich repeat containing 42
ENSMUST00000004910.11	17.4643	1.49703	2.8226	0.343493	4.35824	1.3111e-05	0.00101264	ENSMUSG00000004788	Eif2b2	eukaryotic translation initiation factor 2B, subunit 2 beta [Source:MGI Symbol;Acc:MGI:2145118]	R-MMU-392499	eukaryotic translation initiation factor 2B, subunit 2 beta
ENSMUST00000032194.10	93.3982	1.4946	2.81786	0.319879	4.67238	2.97729e-06	0.000361562	ENSMUSG00000030103	Bhlhe40	basic helix-loop-helix family, member e40 [Source:MGI Symbol;Acc:MGI:1097714]	R-MMU-5334727	basic helix-loop-helix family, member e40
ENSMUST00000001592.14	228.202	1.48527	2.7997	0.366797	4.0493	5.13705e-05	0.00274949	ENSMUSG00000001552	Jup	junction plakoglobin [Source:MGI Symbol;Acc:MGI:96650]	R-MMU-1266738	junction plakoglobin
ENSMUST00000015003.9	28.6623	1.48119	2.79179	0.362262	4.08873	4.3375e-05	0.00243468	ENSMUSG00000014859	E2f4	E2F transcription factor 4 [Source:MGI Symbol;Acc:MGI:103012]	R-MMU-1640170	E2F transcription factor 4
ENSMUST00000034777.13	108.842	1.46323	2.75726	0.366727	3.98998	6.60795e-05	0.0032302	ENSMUSG00000032246	Calml4	calmodulin-like 4 [Source:MGI Symbol;Acc:MGI:1922850]		calmodulin-like 4
ENSMUST00000107302.7	42.8485	1.45516	2.74187	0.389837	3.73274	0.000189408	0.0071146	ENSMUSG00000017801	Mlx	MAX-like protein X [Source:MGI Symbol;Acc:MGI:108398]	R-MMU-1430728	MAX-like protein X
ENSMUST00000047737.9	48.5706	1.45472	2.74103	0.305512	4.76157	1.92094e-06	0.000264112	ENSMUSG00000041515	Irf8	interferon regulatory factor 8 [Source:MGI Symbol;Acc:MGI:96395]		interferon regulatory factor 8
ENSMUST00000044551.7	67.5845	1.43307	2.70021	0.37389	3.83287	0.000126654	0.00541055	ENSMUSG00000009828	Ick	intestinal cell kinase [Source:MGI Symbol;Acc:MGI:1934157]		intestinal cell kinase
ENSMUST00000041859.8	156.246	1.39333	2.62683	0.361496	3.85433	0.000116046	0.00504668	ENSMUSG00000038372	Gmds	GDP-mannose 4, 6-dehydratase [Source:MGI Symbol;Acc:MGI:1891112]	R-MMU-392499	GDP-mannose 4, 6-dehydratase
ENSMUST00000022591.14	30.7876	1.39293	2.62612	0.366177	3.80398	0.000142389	0.00589998	ENSMUSG00000022014	Epsti1	epithelial stromal interaction 1 (breast) [Source:MGI Symbol;Acc:MGI:1915168]		epithelial stromal interaction 1 (breast)
ENSMUST00000030651.8	62.0591	1.35793	2.56317	0.336285	4.03803	5.39027e-05	0.00282062	ENSMUSG00000028843	Sh3bgrl3	SH3 domain binding glutamic acid-rich protein-like 3 [Source:MGI Symbol;Acc:MGI:1920973]		SH3 domain binding glutamic acid-rich protein-like 3
ENSMUST00000029549.15	261.952	1.33345	2.52005	0.326987	4.078	4.54254e-05	0.00252772	ENSMUSG00000027940	Tpm3	tropomyosin 3, gamma [Source:MGI Symbol;Acc:MGI:1890149]	R-MMU-390522	tropomyosin 3, gamma
ENSMUST00000100635.4	36.9652	1.33072	2.51528	0.344228	3.86581	0.00011072	0.00486993	ENSMUSG00000072568	Fam84b	family with sequence similarity 84, member B [Source:MGI Symbol;Acc:MGI:3026924]		family with sequence similarity 84, member B
ENSMUST00000173433.7	21.8182	1.30521	2.4712	0.311654	4.18801	2.81409e-05	0.0017642	ENSMUSG00000035021	Baz1a	bromodomain adjacent to zinc finger domain 1A [Source:MGI Symbol;Acc:MGI:1309478]		bromodomain adjacent to zinc finger domain 1A
ENSMUST00000196111.4	268.661	1.30276	2.467	0.283276	4.59889	4.24753e-06	0.000465998	ENSMUSG00000029622	Arpc1b	actin related protein 2/3 complex, subunit 1B [Source:MGI Symbol;Acc:MGI:1343142]	R-MMU-1266738	actin related protein 2/3 complex, subunit 1B
ENSMUST00000031401.5	33.4472	1.28689	2.44002	0.297683	4.32303	1.539e-05	0.0011608	ENSMUSG00000029449	Rhof	ras homolog family member F (in filopodia) [Source:MGI Symbol;Acc:MGI:1345629]	R-MMU-162582	ras homolog family member F (in filopodia)
ENSMUST00000077755.10	255.138	1.28375	2.43471	0.2489	5.15769	2.5001e-07	6.18571e-05	ENSMUSG00000008475	Arpc5	actin related protein 2/3 complex, subunit 5 [Source:MGI Symbol;Acc:MGI:1915021]	R-MMU-1266738	actin related protein 2/3 complex, subunit 5
ENSMUST00000113215.9	188.694	1.27997	2.42833	0.29744	4.30328	1.68291e-05	0.00122624	ENSMUSG00000032261	Sh3bgrl2	SH3 domain binding glutamic acid-rich protein like 2 [Source:MGI Symbol;Acc:MGI:1915350]		SH3 domain binding glutamic acid-rich protein like 2
ENSMUST00000022696.6	20.1571	1.27511	2.42017	0.313956	4.06141	4.87763e-05	0.00266805	ENSMUSG00000022100	Xpo7	exportin 7 [Source:MGI Symbol;Acc:MGI:1929705]		exportin 7
ENSMUST00000052838.10	25.5697	1.26146	2.39739	0.329621	3.82701	0.000129708	0.00549239	ENSMUSG00000024294	Mib1	mindbomb E3 ubiquitin protein ligase 1 [Source:MGI Symbol;Acc:MGI:2443157]		mindbomb E3 ubiquitin protein ligase 1
ENSMUST00000127638.7	91.4447	1.24175	2.36485	0.296384	4.18965	2.79382e-05	0.00176108	ENSMUSG00000004040	Stat3	signal transducer and activator of transcription 3 [Source:MGI Symbol;Acc:MGI:103038]	R-MMU-162582	signal transducer and activator of transcription 3
ENSMUST00000028135.14	79.064	1.22893	2.34392	0.268899	4.57022	4.87219e-06	0.000499451	ENSMUSG00000026796	Fam129b	family with sequence similarity 129, member B [Source:MGI Symbol;Acc:MGI:2442910]		family with sequence similarity 129, member B
ENSMUST00000134188.7	32.1737	1.2075	2.30937	0.298801	4.04114	5.31926e-05	0.00281293	-
ENSMUST00000109936.2	123.465	1.19149	2.28388	0.30679	3.88372	0.00010287	0.00460863	ENSMUSG00000021097	Clmn	calmin [Source:MGI Symbol;Acc:MGI:2136957]		calmin
ENSMUST00000020692.6	87.6828	1.18627	2.27563	0.289215	4.10169	4.10152e-05	0.00235703	ENSMUSG00000020423	Btg2	B cell translocation gene 2, anti-proliferative [Source:MGI Symbol;Acc:MGI:108384]	R-MMU-212436	B cell translocation gene 2, anti-proliferative
ENSMUST00000114050.7	385.037	1.17965	2.26522	0.295247	3.99548	6.45634e-05	0.00318837	ENSMUSG00000079523	Tmsb10	thymosin, beta 10 [Source:MGI Symbol;Acc:MGI:109146]		thymosin, beta 10
ENSMUST00000019514.9	310.103	1.17533	2.25845	0.314879	3.73265	0.000189475	0.0071146	ENSMUSG00000019370	Calm3	calmodulin 3 [Source:MGI Symbol;Acc:MGI:103249]	R-MMU-199991	calmodulin 3
ENSMUST00000048308.5	94.2627	1.16418	2.24106	0.303876	3.83111	0.000127564	0.00542542	ENSMUSG00000039349	C130074G19Rik	RIKEN cDNA C130074G19 gene [Source:MGI Symbol;Acc:MGI:2444831]		RIKEN cDNA C130074G19 gene
ENSMUST00000019076.9	82.5381	1.15343	2.22442	0.305785	3.77203	0.000161926	0.00643338	ENSMUSG00000018932	Map2k3	mitogen-activated protein kinase kinase 3 [Source:MGI Symbol;Acc:MGI:1346868]	R-MMU-1280215	mitogen-activated protein kinase kinase 3
ENSMUST00000066723.14	3379.2	1.1494	2.21821	0.306065	3.7554	0.000173065	0.00675092	ENSMUSG00000053964	Lgals4	lectin, galactose binding, soluble 4 [Source:MGI Symbol;Acc:MGI:107536]		lectin, galactose binding, soluble 4
ENSMUST00000004565.14	59.1407	1.14583	2.21274	0.303243	3.77859	0.00015772	0.00629781	ENSMUSG00000004451	Ralb	v-ral simian leukemia viral oncogene B [Source:MGI Symbol;Acc:MGI:1927244]		v-ral simian leukemia viral oncogene B
ENSMUST00000066594.3	23.2055	1.13744	2.1999	0.312588	3.63879	0.000273926	0.00926312	ENSMUSG00000053886	Sh2d4a	SH2 domain containing 4A [Source:MGI Symbol;Acc:MGI:1919531]		SH2 domain containing 4A
ENSMUST00000180422.1	83.9859	1.11723	2.16929	0.286145	3.9044	9.44598e-05	0.00429159	-
ENSMUST00000045372.5	48.4793	1.11146	2.16065	0.290065	3.83177	0.000127223	0.00542286	ENSMUSG00000038871	Bpgm	2,3-bisphosphoglycerate mutase [Source:MGI Symbol;Acc:MGI:1098242]	R-MMU-1430728	2,3-bisphosphoglycerate mutase
ENSMUST00000089017.11	54.2142	1.06783	2.09627	0.282053	3.7859	0.000153154	0.00618672	ENSMUSG00000033487	Fndc3a	fibronectin type III domain containing 3A [Source:MGI Symbol;Acc:MGI:1196463]		fibronectin type III domain containing 3A
ENSMUST00000079644.12	531.029	1.04722	2.06654	0.25802	4.05867	4.93525e-05	0.00266932	ENSMUSG00000028639	Ybx1	Y box protein 1 [Source:MGI Symbol;Acc:MGI:99146]	R-MMU-72163	Y box protein 1
ENSMUST00000025350.9	31.1685	1.02208	2.03084	0.282344	3.61998	0.000294626	0.0098938	ENSMUSG00000024472	Dcp2	decapping mRNA 2 [Source:MGI Symbol;Acc:MGI:1917890]	R-MMU-450531	decapping mRNA 2
ENSMUST00000019577.9	39.8623	1.01845	2.02574	0.27868	3.65455	0.000257636	0.00888338	ENSMUSG00000019433	Gipc1	GIPC PDZ domain containing family, member 1 [Source:MGI Symbol;Acc:MGI:1926252]		GIPC PDZ domain containing family, member 1
ENSMUST00000204978.2	79.4067	-1.03431	2.04813	0.249559	-4.14456	3.40467e-05	0.00204164	ENSMUSG00000029632	Ndufa4	NADH dehydrogenase (ubiquinone) 1 alpha subcomplex, 4 [Source:MGI Symbol;Acc:MGI:107686]		NADH dehydrogenase (ubiquinone) 1 alpha subcomplex, 4
ENSMUST00000017851.3	129.426	-1.05784	2.08182	0.285354	-3.70713	0.000209624	0.00768052	ENSMUSG00000017707	Serinc3	serine incorporator 3 [Source:MGI Symbol;Acc:MGI:1349457]	R-MMU-1430728	serine incorporator 3
ENSMUST00000022704.7	328.098	-1.08081	2.11523	0.272281	-3.96948	7.20299e-05	0.00345977	ENSMUSG00000022108	Itm2b	integral membrane protein 2B [Source:MGI Symbol;Acc:MGI:1309517]		integral membrane protein 2B
ENSMUST00000029699.12	112.601	-1.10398	2.14946	0.26765	-4.12471	3.71205e-05	0.0021786	ENSMUSG00000028063	Lmna	lamin A [Source:MGI Symbol;Acc:MGI:96794]	R-MMU-1640170	lamin A
ENSMUST00000030538.4	54.558	-1.13581	2.19741	0.244356	-4.64816	3.34914e-06	0.00038957	ENSMUSG00000028757	Ddost	dolichyl-di-phosphooligosaccharide-protein glycotransferase [Source:MGI Symbol;Acc:MGI:1194508]	R-MMU-168249	dolichyl-di-phosphooligosaccharide-protein glycotransferase
ENSMUST00000020909.3	145.038	-1.14773	2.21564	0.261479	-4.38936	1.13685e-05	0.000914641	ENSMUSG00000020585	Laptm4a	lysosomal-associated protein transmembrane 4A [Source:MGI Symbol;Acc:MGI:108017]		lysosomal-associated protein transmembrane 4A
ENSMUST00000201880.1	115.293	-1.15695	2.22985	0.283072	-4.08712	4.36765e-05	0.00244449	ENSMUSG00000014956	Ppp1cb	protein phosphatase 1, catalytic subunit, beta isoform [Source:MGI Symbol;Acc:MGI:104871]	R-MMU-1640170	protein phosphatase 1, catalytic subunit, beta isoform
ENSMUST00000224952.1	41.1943	-1.1664	2.2445	0.266743	-4.37274	1.22694e-05	0.000966981	ENSMUSG00000021733	Slc4a7	solute carrier family 4, sodium bicarbonate cotransporter, member 7 [Source:MGI Symbol;Acc:MGI:2443878]	R-MMU-382551	solute carrier family 4, sodium bicarbonate cotransporter, member 7
ENSMUST00000200541.4	48.2813	-1.18816	2.27862	0.29635	-4.00933	6.08916e-05	0.00311047	ENSMUSG00000029455	Aldh2	aldehyde dehydrogenase 2, mitochondrial [Source:MGI Symbol;Acc:MGI:99600]	R-MMU-112315	aldehyde dehydrogenase 2, mitochondrial
ENSMUST00000009435.11	80.9241	-1.2225	2.3335	0.277655	-4.40293	1.06798e-05	0.000885046	ENSMUSG00000009291	Pttg1ip	pituitary tumor-transforming 1 interacting protein [Source:MGI Symbol;Acc:MGI:2652132]		pituitary tumor-transforming 1 interacting protein
ENSMUST00000167866.1	41.7132	-1.24944	2.37748	0.334834	-3.73151	0.000190333	0.00712235	ENSMUSG00000032279	Idh3a	isocitrate dehydrogenase 3 (NAD+) alpha [Source:MGI Symbol;Acc:MGI:1915084]	R-MMU-1428517	isocitrate dehydrogenase 3 (NAD+) alpha
ENSMUST00000105283.8	63.7142	-1.33402	2.52104	0.314819	-4.23742	2.26104e-05	0.00151528	ENSMUSG00000019966	Kitl	kit ligand [Source:MGI Symbol;Acc:MGI:96974]	R-MMU-1266738	kit ligand
ENSMUST00000034140.8	36.3418	-1.35419	2.55653	0.366708	-3.69282	0.000221778	0.0079894	ENSMUSG00000031703	Itfg1	integrin alpha FG-GAP repeat containing 1 [Source:MGI Symbol;Acc:MGI:106419]		integrin alpha FG-GAP repeat containing 1
ENSMUST00000164181.1	1595.53	-1.36601	2.57756	0.304261	-4.48959	7.13591e-06	0.000658756	ENSMUSG00000090841	Myl6	myosin, light polypeptide 6, alkali, smooth muscle and non-muscle [Source:MGI Symbol;Acc:MGI:109318]	R-MMU-162582	myosin, light polypeptide 6, alkali, smooth muscle and non-muscle
ENSMUST00000105691.7	59.3846	-1.36857	2.58214	0.324492	-4.21757	2.46954e-05	0.00160746	ENSMUSG00000039953	Clstn1	calsyntenin 1 [Source:MGI Symbol;Acc:MGI:1929895]		calsyntenin 1
ENSMUST00000021605.13	18.3407	-1.36921	2.58329	0.317127	-4.31754	1.57776e-05	0.00117626	ENSMUSG00000021188	Trip11	thyroid hormone receptor interactor 11 [Source:MGI Symbol;Acc:MGI:1924393]	R-MMU-1852241	thyroid hormone receptor interactor 11
ENSMUST00000026142.7	27.4076	-1.37669	2.59672	0.376797	-3.65367	0.000258518	0.00889791	ENSMUSG00000025151	Maged1	melanoma antigen, family D, 1 [Source:MGI Symbol;Acc:MGI:1930187]	R-MMU-162582	melanoma antigen, family D, 1
ENSMUST00000022867.3	26.3063	-1.3841	2.6101	0.319875	-4.32702	1.51141e-05	0.00114446	ENSMUSG00000022257	Laptm4b	lysosomal-associated protein transmembrane 4B [Source:MGI Symbol;Acc:MGI:1890494]		lysosomal-associated protein transmembrane 4B
ENSMUST00000033933.6	37.3427	-1.39813	2.63559	0.306981	-4.55445	5.25237e-06	0.000530439	ENSMUSG00000031532	Saraf	store-operated calcium entry-associated regulatory factor [Source:MGI Symbol;Acc:MGI:1915137]		store-operated calcium entry-associated regulatory factor
ENSMUST00000028551.3	20.1848	-1.42	2.67586	0.369009	-3.84815	0.000119013	0.00514098	ENSMUSG00000027131	Emc4	ER membrane protein complex subunit 4 [Source:MGI Symbol;Acc:MGI:1915282]		ER membrane protein complex subunit 4
ENSMUST00000043259.9	59.2658	-1.43061	2.69561	0.306985	-4.66021	3.1589e-06	0.000376265	ENSMUSG00000041741	Pde3a	phosphodiesterase 3A, cGMP inhibited [Source:MGI Symbol;Acc:MGI:1860764]	R-MMU-109582	phosphodiesterase 3A, cGMP inhibited
ENSMUST00000094215.9	19.3914	-1.48192	2.7932	0.406197	-3.64827	0.000264012	0.00905473	ENSMUSG00000038503	Mesd	mesoderm development LRP chaperone [Source:MGI Symbol;Acc:MGI:1891421]		mesoderm development LRP chaperone
ENSMUST00000097014.5	107.672	-1.50854	2.84522	0.269953	-5.58816	2.29487e-08	8.68856e-06	ENSMUSG00000072235	Tuba1a	tubulin, alpha 1A [Source:MGI Symbol;Acc:MGI:98869]	R-MMU-1852241	tubulin, alpha 1A
ENSMUST00000060992.5	69.5947	-1.5152	2.85838	0.33275	-4.55356	5.27444e-06	0.000530439	ENSMUSG00000020458	Rtn4	reticulon 4 [Source:MGI Symbol;Acc:MGI:1915835]	R-MMU-162582	reticulon 4
ENSMUST00000005406.10	138.955	-1.54059	2.90913	0.252667	-6.09729	1.07878e-09	6.94342e-07	ENSMUSG00000022892	App	amyloid beta (A4) precursor protein [Source:MGI Symbol;Acc:MGI:88059]	R-MMU-109582	amyloid beta (A4) precursor protein
ENSMUST00000221108.1	22.287	-1.54392	2.91586	0.424672	-3.63556	0.000277375	0.00936336	-
ENSMUST00000001254.5	281.714	-1.55308	2.93443	0.373164	-4.16193	3.15569e-05	0.00193439	ENSMUSG00000001225	Slc26a3	solute carrier family 26, member 3 [Source:MGI Symbol;Acc:MGI:107181]	R-MMU-382551	solute carrier family 26, member 3
ENSMUST00000024015.2	602.591	-1.57767	2.98487	0.374095	-4.21729	2.47251e-05	0.00160746	ENSMUSG00000023247	Guca2a	guanylate cyclase activator 2a (guanylin) [Source:MGI Symbol;Acc:MGI:102738]	R-MMU-8963743	guanylate cyclase activator 2a (guanylin)
ENSMUST00000024906.4	35.2491	-1.5964	3.02388	0.360304	-4.4307	9.39294e-06	0.000799369	ENSMUSG00000024098	Twsg1	twisted gastrulation BMP signaling modulator 1 [Source:MGI Symbol;Acc:MGI:2137520]		twisted gastrulation BMP signaling modulator 1
ENSMUST00000219759.1	107.572	-1.59811	3.02746	0.427534	-3.73797	0.000185514	0.00707922	ENSMUSG00000019907	Ppp1r12a	protein phosphatase 1, regulatory (inhibitor) subunit 12A [Source:MGI Symbol;Acc:MGI:1309528]	R-MMU-1640170	protein phosphatase 1, regulatory (inhibitor) subunit 12A
ENSMUST00000087883.12	211.404	-1.61298	3.05882	0.346275	-4.65808	3.19172e-06	0.000376265	ENSMUSG00000026043	Col3a1	collagen, type III, alpha 1 [Source:MGI Symbol;Acc:MGI:88453]	R-MMU-1266738	collagen, type III, alpha 1
ENSMUST00000089377.5	184.954	-1.62207	3.07816	0.439412	-3.69144	0.000222984	0.00799468	ENSMUSG00000068220	Lgals1	lectin, galactose binding, soluble 1 [Source:MGI Symbol;Acc:MGI:96777]	R-MMU-392499	lectin, galactose binding, soluble 1
ENSMUST00000114763.2	46.7062	-1.6299	3.09491	0.447504	-3.6422	0.000270319	0.00918942	ENSMUSG00000022816	Fstl1	follistatin-like 1 [Source:MGI Symbol;Acc:MGI:102793]	R-MMU-162582	follistatin-like 1
ENSMUST00000048794.6	12.5544	-1.6543	3.1477	0.441493	-3.74705	0.000178926	0.00690975	ENSMUSG00000038253	Hoxa5	homeobox A5 [Source:MGI Symbol;Acc:MGI:96177]		homeobox A5
ENSMUST00000034876.9	147.658	-1.67131	3.18504	0.397444	-4.20515	2.60904e-05	0.00166264	ENSMUSG00000032324	Tspan3	tetraspanin 3 [Source:MGI Symbol;Acc:MGI:1928098]		tetraspanin 3
ENSMUST00000034717.6	49.872	-1.67425	3.19152	0.43308	-3.8659	0.00011068	0.00486993	ENSMUSG00000032194	Kank2	KN motif and ankyrin repeat domains 2 [Source:MGI Symbol;Acc:MGI:2384568]		KN motif and ankyrin repeat domains 2
ENSMUST00000115271.2	39.8365	-1.67534	3.19395	0.362641	-4.61984	3.84043e-06	0.000428641	-
ENSMUST00000018361.9	159.086	-1.68254	3.20993	0.348713	-4.825	1.40003e-06	0.00021455	ENSMUSG00000018217	Pmp22	peripheral myelin protein 22 [Source:MGI Symbol;Acc:MGI:97631]		peripheral myelin protein 22
ENSMUST00000047753.4	59.503	-1.68404	3.21326	0.455539	-3.6968	0.000218331	0.00790064	ENSMUSG00000040584	Abcb1a	ATP-binding cassette, sub-family B (MDR/TAP), member 1A [Source:MGI Symbol;Acc:MGI:97570]	R-MMU-382551	ATP-binding cassette, sub-family B (MDR/TAP), member 1A
ENSMUST00000032492.8	137.378	-1.69675	3.24169	0.311858	-5.44076	5.30523e-08	1.67932e-05	ENSMUSG00000030342	Cd9	CD9 antigen [Source:MGI Symbol;Acc:MGI:88348]	R-MMU-109582	CD9 antigen
ENSMUST00000019965.12	16.9943	-1.70857	3.26838	0.403276	-4.23673	2.26794e-05	0.00151528	ENSMUSG00000019822	Smpd2	sphingomyelin phosphodiesterase 2, neutral [Source:MGI Symbol;Acc:MGI:1278330]	R-MMU-162582	sphingomyelin phosphodiesterase 2, neutral
ENSMUST00000055052.5	166.8	-1.71196	3.27606	0.396796	-4.31446	1.5999e-05	0.00118376	ENSMUSG00000061825	Ces2c	carboxylesterase 2C [Source:MGI Symbol;Acc:MGI:2385905]	R-MMU-1430728	carboxylesterase 2C
ENSMUST00000046212.1	100.125	-1.71838	3.29067	0.42907	-4.00489	6.20455e-05	0.00314445	ENSMUSG00000032902	Slc16a1	solute carrier family 16 (monocarboxylic acid transporters), member 1 [Source:MGI Symbol;Acc:MGI:106013]	R-MMU-382551	solute carrier family 16 (monocarboxylic acid transporters), member 1
ENSMUST00000019516.4	32.2319	-1.73483	3.3284	0.387061	-4.48206	7.3926e-06	0.000670158	ENSMUSG00000075590	Nrbp2	nuclear receptor binding protein 2 [Source:MGI Symbol;Acc:MGI:2385017]		nuclear receptor binding protein 2
ENSMUST00000161567.7	49.5206	-1.73913	3.33834	0.392528	-4.43059	9.39752e-06	0.000799369	ENSMUSG00000026335	Pam	peptidylglycine alpha-amidating monooxygenase [Source:MGI Symbol;Acc:MGI:97475]		peptidylglycine alpha-amidating monooxygenase
ENSMUST00000218127.1	124.782	-1.74227	3.34561	0.396155	-4.39795	1.0928e-05	0.000897913	ENSMUSG00000090841	Myl6	myosin, light polypeptide 6, alkali, smooth muscle and non-muscle [Source:MGI Symbol;Acc:MGI:109318]	R-MMU-162582	myosin, light polypeptide 6, alkali, smooth muscle and non-muscle
ENSMUST00000064762.5	17.8688	-1.77828	3.43017	0.472719	-3.76181	0.000168689	0.00663382	ENSMUSG00000052727	Map1b	microtubule-associated protein 1B [Source:MGI Symbol;Acc:MGI:1306778]		microtubule-associated protein 1B
ENSMUST00000068664.6	23.5492	-1.79597	3.47248	0.490389	-3.66233	0.000249935	0.00869548	ENSMUSG00000032340	Neo1	neogenin [Source:MGI Symbol;Acc:MGI:1097159]		neogenin
ENSMUST00000040104.4	26.8208	-1.81687	3.52315	0.474548	-3.82862	0.000128863	0.00546861	ENSMUSG00000038193	Hand2	heart and neural crest derivatives expressed 2 [Source:MGI Symbol;Acc:MGI:103580]		heart and neural crest derivatives expressed 2
ENSMUST00000058754.8	15.187	-1.82521	3.54359	0.425584	-4.28872	1.79704e-05	0.00129474	ENSMUSG00000043207	Zmpste24	zinc metallopeptidase, STE24 [Source:MGI Symbol;Acc:MGI:1890508]		zinc metallopeptidase, STE24
ENSMUST00000105287.10	201.972	-1.83377	3.56469	0.507001	-3.6169	0.00029815	0.00998535	ENSMUSG00000019929	Dcn	decorin [Source:MGI Symbol;Acc:MGI:94872]	R-MMU-1474244	decorin
ENSMUST00000059997.8	30.4535	-1.8482	3.6005	0.43622	-4.23685	2.26676e-05	0.00151528	ENSMUSG00000045838	A430105I19Rik	RIKEN cDNA A430105I19 gene [Source:MGI Symbol;Acc:MGI:2685199]		RIKEN cDNA A430105I19 gene
ENSMUST00000028623.12	14.9835	-1.84868	3.6017	0.421693	-4.38394	1.16551e-05	0.000929955	ENSMUSG00000027198	Ext2	exostoses (multiple) 2 [Source:MGI Symbol;Acc:MGI:108050]	R-MMU-1430728	exostoses (multiple) 2
ENSMUST00000020027.10	62.5987	-1.85487	3.61719	0.435851	-4.25574	2.0836e-05	0.00142667	ENSMUSG00000019877	Serinc1	serine incorporator 1 [Source:MGI Symbol;Acc:MGI:1926228]		serine incorporator 1
ENSMUST00000020107.7	76.0978	-1.87663	3.67217	0.511594	-3.66821	0.000244256	0.0085596	ENSMUSG00000019943	Atp2b1	ATPase, Ca++ transporting, plasma membrane 1 [Source:MGI Symbol;Acc:MGI:104653]	R-MMU-382551	ATPase, Ca++ transporting, plasma membrane 1
ENSMUST00000090243.7	14.4942	-1.87671	3.67236	0.425551	-4.41007	1.03339e-05	0.000860075	ENSMUSG00000029924	Slc37a3	solute carrier family 37 (glycerol-3-phosphate transporter), member 3 [Source:MGI Symbol;Acc:MGI:1919394]		solute carrier family 37 (glycerol-3-phosphate transporter), member 3
ENSMUST00000114276.2	28.7885	-1.87948	3.67943	0.441805	-4.25409	2.09897e-05	0.00143212	ENSMUSG00000032320	Rcn2	reticulocalbin 2 [Source:MGI Symbol;Acc:MGI:1349765]		reticulocalbin 2
ENSMUST00000040789.4	25.7943	-1.88853	3.70257	0.482853	-3.91118	9.18448e-05	0.00420245	ENSMUSG00000024084	Qpct	glutaminyl-peptide cyclotransferase (glutaminyl cyclase) [Source:MGI Symbol;Acc:MGI:1917786]	R-MMU-168249	glutaminyl-peptide cyclotransferase (glutaminyl cyclase)
ENSMUST00000090006.11	208.609	-1.89322	3.71463	0.413932	-4.57373	4.79107e-06	0.000499145	ENSMUSG00000025809	Itgb1	integrin beta 1 (fibronectin receptor beta) [Source:MGI Symbol;Acc:MGI:96610]	R-MMU-1266738	integrin beta 1 (fibronectin receptor beta)
ENSMUST00000135188.1	11.8758	-1.90257	3.73879	0.520424	-3.65581	0.000256368	0.00885546	-
ENSMUST00000181504.1	17.6544	-1.91399	3.76849	0.513016	-3.73085	0.000190834	0.0071273	ENSMUSG00000042812	Foxf1	forkhead box F1 [Source:MGI Symbol;Acc:MGI:1347470]		forkhead box F1
ENSMUST00000149978.1	34	-1.91661	3.77535	0.408402	-4.69295	2.6929e-06	0.000340584	ENSMUSG00000074918	Inafm2	InaF motif containing 2 [Source:MGI Symbol;Acc:MGI:1915354]		InaF motif containing 2
ENSMUST00000049454.5	9.23733	-1.92891	3.80769	0.519038	-3.71633	0.000202141	0.00742043	ENSMUSG00000040841	Six5	sine oculis-related homeobox 5 [Source:MGI Symbol;Acc:MGI:106220]		sine oculis-related homeobox 5
ENSMUST00000001513.6	42.6386	-1.92997	3.81048	0.368585	-5.23617	1.63947e-07	4.65538e-05	ENSMUSG00000001473	Tubb6	tubulin, beta 6 class V [Source:MGI Symbol;Acc:MGI:1915201]	R-MMU-1852241	tubulin, beta 6 class V
ENSMUST00000031741.7	99.9965	-1.9402	3.83759	0.482141	-4.02414	5.71845e-05	0.00296821	ENSMUSG00000029727	Cyp3a13	cytochrome P450, family 3, subfamily a, polypeptide 13 [Source:MGI Symbol;Acc:MGI:88610]	R-MMU-1430728	cytochrome P450, family 3, subfamily a, polypeptide 13
ENSMUST00000107503.7	11.4266	-1.96969	3.91684	0.50938	-3.86684	0.000110254	0.00486993	ENSMUSG00000068923	Syt11	synaptotagmin XI [Source:MGI Symbol;Acc:MGI:1859547]		synaptotagmin XI
ENSMUST00000128977.2	38.8987	-1.97506	3.93146	0.536045	-3.68451	0.00022914	0.00813322	-
ENSMUST00000021204.3	23.6536	-1.98596	3.96127	0.488908	-4.06204	4.86456e-05	0.00266805	ENSMUSG00000020844	Nxn	nucleoredoxin [Source:MGI Symbol;Acc:MGI:109331]		nucleoredoxin
ENSMUST00000057151.9	11.3702	-1.98724	3.96477	0.497512	-3.99436	6.48705e-05	0.00319537	ENSMUSG00000043061	Tmem18	transmembrane protein 18 [Source:MGI Symbol;Acc:MGI:2387176]		transmembrane protein 18
ENSMUST00000098799.4	57.812	-1.99782	3.99397	0.49431	-4.04164	5.30794e-05	0.00281293	ENSMUSG00000074364	Ehd2	EH-domain containing 2 [Source:MGI Symbol;Acc:MGI:2154274]	R-MMU-109582	EH-domain containing 2
ENSMUST00000036991.4	47.8708	-2.00281	4.0078	0.536233	-3.73497	0.00018774	0.0071146	ENSMUSG00000041548	Hspb8	heat shock protein 8 [Source:MGI Symbol;Acc:MGI:2135756]	R-MMU-2262752	heat shock protein 8
ENSMUST00000145738.7	83.4426	-2.00675	4.01875	0.435225	-4.61083	4.01074e-06	0.000445077	ENSMUSG00000021870	Slmap	sarcolemma associated protein [Source:MGI Symbol;Acc:MGI:1933549]		sarcolemma associated protein
ENSMUST00000034049.4	187.193	-2.0112	4.03118	0.429973	-4.67751	2.90381e-06	0.000359422	ENSMUSG00000031633	Slc25a4	solute carrier family 25 (mitochondrial carrier, adenine nucleotide translocator), member 4 [Source:MGI Symbol;Acc:MGI:1353495]	R-MMU-1430728	solute carrier family 25 (mitochondrial carrier, adenine nucleotide translocator), member 4
ENSMUST00000029780.11	19.8083	-2.0117	4.03256	0.49682	-4.04915	5.14042e-05	0.00274949	ENSMUSG00000028134	Ptbp2	polypyrimidine tract binding protein 2 [Source:MGI Symbol;Acc:MGI:1860489]		polypyrimidine tract binding protein 2
ENSMUST00000094469.4	66.9959	-2.01825	4.05092	0.423428	-4.76645	1.87496e-06	0.000260457	ENSMUSG00000075702	Selenom	selenoprotein M [Source:MGI Symbol;Acc:MGI:2149786]		selenoprotein M
ENSMUST00000166554.1	13.5671	-2.03497	4.09814	0.508311	-4.00339	6.24407e-05	0.0031562	ENSMUSG00000043384	Gprasp1	G protein-coupled receptor associated sorting protein 1 [Source:MGI Symbol;Acc:MGI:1917418]		G protein-coupled receptor associated sorting protein 1
ENSMUST00000004497.10	11.2083	-2.04525	4.12746	0.499535	-4.09431	4.23419e-05	0.0023976	ENSMUSG00000004383	Large1	LARGE xylosyl- and glucuronyltransferase 1 [Source:MGI Symbol;Acc:MGI:1342270]	R-MMU-392499	LARGE xylosyl- and glucuronyltransferase 1
ENSMUST00000075994.10	26.6283	-2.05752	4.16271	0.531016	-3.87469	0.000106759	0.0047498	ENSMUSG00000035357	Pdzrn3	PDZ domain containing RING finger 3 [Source:MGI Symbol;Acc:MGI:1933157]		PDZ domain containing RING finger 3
ENSMUST00000037941.9	64.7749	-2.07351	4.2091	0.496944	-4.17252	3.01244e-05	0.00187033	ENSMUSG00000037706	Cd81	CD81 antigen [Source:MGI Symbol;Acc:MGI:1096398]	R-MMU-1280218	CD81 antigen
ENSMUST00000108858.7	165.338	-2.07643	4.21761	0.552523	-3.75808	0.000171221	0.00671975	ENSMUSG00000018593	Sparc	secreted acidic cysteine rich glycoprotein [Source:MGI Symbol;Acc:MGI:98373]	R-MMU-109582	secreted acidic cysteine rich glycoprotein
ENSMUST00000139375.7	20.7939	-2.08894	4.25435	0.483429	-4.32108	1.55266e-05	0.00116655	-
ENSMUST00000091288.12	104.251	-2.09102	4.26048	0.444092	-4.70852	2.49524e-06	0.000322392	ENSMUSG00000079037	Prnp	prion protein [Source:MGI Symbol;Acc:MGI:97769]	R-MMU-1266738	prion protein
ENSMUST00000048187.5	36.1267	-2.13717	4.39898	0.49493	-4.31812	1.57365e-05	0.00117626	ENSMUSG00000037166	Ppp1r14a	protein phosphatase 1, regulatory (inhibitor) subunit 14A [Source:MGI Symbol;Acc:MGI:1931139]	R-MMU-162582	protein phosphatase 1, regulatory (inhibitor) subunit 14A
ENSMUST00000115028.9	34.3362	-2.13958	4.40634	0.55395	-3.86241	0.000112275	0.00491592	ENSMUSG00000022817	Itgb5	integrin beta 5 [Source:MGI Symbol;Acc:MGI:96614]	R-MMU-1280218	integrin beta 5
ENSMUST00000060792.5	217.429	-2.1433	4.41771	0.415641	-5.15662	2.5145e-07	6.18571e-05	ENSMUSG00000004044	Cavin1	caveolae associated 1 [Source:MGI Symbol;Acc:MGI:1277968]	R-MMU-74160	caveolae associated 1
ENSMUST00000107973.2	13.336	-2.20587	4.61352	0.548386	-4.02247	5.7591e-05	0.0029813	ENSMUSG00000036052	Dnajb5	DnaJ heat shock protein family (Hsp40) member B5 [Source:MGI Symbol;Acc:MGI:1930018]		DnaJ heat shock protein family (Hsp40) member B5
ENSMUST00000007799.12	89.1376	-2.2404	4.72529	0.609391	-3.67646	0.000236493	0.00834815	ENSMUSG00000007655	Cav1	caveolin 1, caveolae protein [Source:MGI Symbol;Acc:MGI:102709]	R-MMU-109582	caveolin 1, caveolae protein
ENSMUST00000124248.7	42.5786	-2.2632	4.80055	0.544372	-4.15745	3.21813e-05	0.00196022	ENSMUSG00000019254	Ppp1r12c	protein phosphatase 1, regulatory (inhibitor) subunit 12C [Source:MGI Symbol;Acc:MGI:1924258]		protein phosphatase 1, regulatory (inhibitor) subunit 12C
ENSMUST00000161744.1	14.5989	-2.27325	4.83411	0.568613	-3.99789	6.39107e-05	0.00316423	ENSMUSG00000026478	Lamc1	laminin, gamma 1 [Source:MGI Symbol;Acc:MGI:99914]	R-MMU-162582	laminin, gamma 1
ENSMUST00000027861.5	138.467	-2.29087	4.89351	0.500284	-4.57914	4.66889e-06	0.000499145	ENSMUSG00000026574	Dpt	dermatopontin [Source:MGI Symbol;Acc:MGI:1928392]		dermatopontin
ENSMUST00000045905.12	54.5345	-2.30974	4.95793	0.609352	-3.79048	0.000150356	0.00612494	ENSMUSG00000037712	Fermt2	fermitin family member 2 [Source:MGI Symbol;Acc:MGI:2385001]	R-MMU-1500931	fermitin family member 2
ENSMUST00000139869.7	31.3208	-2.32964	5.0268	0.530382	-4.39238	1.12115e-05	0.000913434	ENSMUSG00000031626	Sorbs2	sorbin and SH3 domain containing 2 [Source:MGI Symbol;Acc:MGI:1924574]		sorbin and SH3 domain containing 2
ENSMUST00000046246.12	29.5233	-2.35955	5.13211	0.582573	-4.05023	5.11681e-05	0.00274949	ENSMUSG00000021493	Pdlim7	PDZ and LIM domain 7 [Source:MGI Symbol;Acc:MGI:1914649]	R-MMU-1266738	PDZ and LIM domain 7
ENSMUST00000040715.6	81.8988	-2.37278	5.17938	0.621904	-3.81535	0.00013599	0.00568361	ENSMUSG00000042485	Mustn1	musculoskeletal, embryonic nuclear protein 1 [Source:MGI Symbol;Acc:MGI:1913425]		musculoskeletal, embryonic nuclear protein 1
ENSMUST00000035565.3	13.9558	-2.37834	5.19938	0.476564	-4.99061	6.01903e-07	0.000122338	ENSMUSG00000032855	Pkd1	polycystin 1, transient receptor poteintial channel interacting [Source:MGI Symbol;Acc:MGI:97603]	R-MMU-1852241	polycystin 1, transient receptor poteintial channel interacting
ENSMUST00000061673.8	34.8149	-2.38329	5.21725	0.495901	-4.80597	1.54e-06	0.000225272	ENSMUSG00000042284	Itga1	integrin alpha 1 [Source:MGI Symbol;Acc:MGI:96599]	R-MMU-1266738	integrin alpha 1
ENSMUST00000023083.7	11.8475	-2.39647	5.26514	0.528527	-4.53424	5.78104e-06	0.000569521	ENSMUSG00000061740	Cyp2d22	cytochrome P450, family 2, subfamily d, polypeptide 22 [Source:MGI Symbol;Acc:MGI:1929474]	R-MMU-1430728	cytochrome P450, family 2, subfamily d, polypeptide 22
ENSMUST00000070478.3	26.8785	-2.40374	5.29173	0.568061	-4.23148	2.32157e-05	0.00153371	ENSMUSG00000025743	Sdc3	syndecan 3 [Source:MGI Symbol;Acc:MGI:1349163]	R-MMU-109582	syndecan 3
ENSMUST00000115098.6	10.0257	-2.42277	5.362	0.648512	-3.73589	0.000187051	0.0071146	ENSMUSG00000038319	Kcnh2	potassium voltage-gated channel, subfamily H (eag-related), member 2 [Source:MGI Symbol;Acc:MGI:1341722]	R-MMU-112316	potassium voltage-gated channel, subfamily H (eag-related), member 2
ENSMUST00000057859.8	24.8695	-2.42605	5.37421	0.651652	-3.72293	0.000196924	0.00728431	ENSMUSG00000048285	Frmd6	FERM domain containing 6 [Source:MGI Symbol;Acc:MGI:2442579]		FERM domain containing 6
ENSMUST00000026666.12	18.8904	-2.44053	5.42842	0.494402	-4.93633	7.96069e-07	0.000142238	ENSMUSG00000025579	Gaa	glucosidase, alpha, acid [Source:MGI Symbol;Acc:MGI:95609]	R-MMU-168249	glucosidase, alpha, acid
ENSMUST00000038775.5	27.6328	-2.46032	5.50339	0.650555	-3.78188	0.000155651	0.00624837	ENSMUSG00000033585	Ndn	necdin [Source:MGI Symbol;Acc:MGI:97290]		necdin
ENSMUST00000097653.10	29.1272	-2.47468	5.55844	0.671014	-3.68797	0.000226051	0.00803836	ENSMUSG00000048126	Col6a3	collagen, type VI, alpha 3 [Source:MGI Symbol;Acc:MGI:88461]	R-MMU-1266738	collagen, type VI, alpha 3
ENSMUST00000207932.1	38.7917	-2.47731	5.5686	0.530104	-4.67326	2.9646e-06	0.000361562	ENSMUSG00000039405	Prss23	protease, serine 23 [Source:MGI Symbol;Acc:MGI:1923703]	R-MMU-392499	protease, serine 23
ENSMUST00000046792.8	8.9453	-2.48443	5.59613	0.664235	-3.74029	0.000183812	0.00702815	ENSMUSG00000038463	Olfml2b	olfactomedin-like 2B [Source:MGI Symbol;Acc:MGI:2443310]		olfactomedin-like 2B
ENSMUST00000171000.1	14.7297	-2.48529	5.59947	0.658394	-3.77477	0.000160153	0.00637605	ENSMUSG00000035258	Abi3bp	ABI gene family, member 3 (NESH) binding protein [Source:MGI Symbol;Acc:MGI:2444583]		ABI gene family, member 3 (NESH) binding protein
ENSMUST00000080035.10	15.9866	-2.50259	5.66701	0.497427	-5.03106	4.87763e-07	0.000103497	ENSMUSG00000035776	Cd99l2	CD99 antigen-like 2 [Source:MGI Symbol;Acc:MGI:2177151]	R-MMU-109582	CD99 antigen-like 2
ENSMUST00000044766.14	20.5888	-2.52579	5.75891	0.68882	-3.66684	0.000245566	0.00857437	ENSMUSG00000027309	4930402H24Rik	RIKEN cDNA 4930402H24 gene [Source:MGI Symbol;Acc:MGI:1923029]		RIKEN cDNA 4930402H24 gene
ENSMUST00000018755.9	15.1266	-2.56404	5.91361	0.632793	-4.05194	5.07955e-05	0.0027397	ENSMUSG00000020388	Pdlim4	PDZ and LIM domain 4 [Source:MGI Symbol;Acc:MGI:1353470]		PDZ and LIM domain 4
ENSMUST00000045665.12	101.167	-2.5702	5.93894	0.526047	-4.88589	1.02965e-06	0.000174399	ENSMUSG00000073557	Ppp1r12b	protein phosphatase 1, regulatory (inhibitor) subunit 12B [Source:MGI Symbol;Acc:MGI:1916417]	R-MMU-1640170	protein phosphatase 1, regulatory (inhibitor) subunit 12B
ENSMUST00000113690.7	16.8406	-2.57533	5.96008	0.669742	-3.84526	0.000120425	0.00519038	ENSMUSG00000032366	Tpm1	tropomyosin 1, alpha [Source:MGI Symbol;Acc:MGI:98809]	R-MMU-390522	tropomyosin 1, alpha
ENSMUST00000149930.2	32.006	-2.61426	6.12309	0.689657	-3.79067	0.000150242	0.00612494	-
ENSMUST00000028633.12	17.523	-2.61609	6.13087	0.519381	-5.03694	4.73035e-07	0.000101487	ENSMUSG00000027204	Fbn1	fibrillin 1 [Source:MGI Symbol;Acc:MGI:95489]	R-MMU-392499	fibrillin 1
ENSMUST00000022871.5	34.9837	-2.62986	6.18966	0.448919	-5.8582	4.67898e-09	2.25866e-06	ENSMUSG00000022261	Sdc2	syndecan 2 [Source:MGI Symbol;Acc:MGI:1349165]	R-MMU-1266738	syndecan 2
ENSMUST00000107570.1	23.2655	-2.63533	6.21319	0.603894	-4.3639	1.27762e-05	0.000996976	ENSMUSG00000038668	Lpar1	lysophosphatidic acid receptor 1 [Source:MGI Symbol;Acc:MGI:108429]	R-MMU-162582	lysophosphatidic acid receptor 1
ENSMUST00000121200.8	128.29	-2.63595	6.21585	0.480305	-5.48808	4.06321e-08	1.37643e-05	ENSMUSG00000058056	Palld	palladin, cytoskeletal associated protein [Source:MGI Symbol;Acc:MGI:1919583]		palladin, cytoskeletal associated protein
ENSMUST00000005077.6	121.956	-2.67142	6.37055	0.681154	-3.9219	8.78534e-05	0.00405828	ENSMUSG00000004951	Hspb1	heat shock protein 1 [Source:MGI Symbol;Acc:MGI:96240]	R-MMU-162582	heat shock protein 1
ENSMUST00000130528.7	8.48491	-2.68765	6.44265	0.674819	-3.98278	6.81135e-05	0.00332122	-
ENSMUST00000113695.7	499.406	-2.69768	6.48756	0.508678	-5.30331	1.13719e-07	3.43095e-05	ENSMUSG00000032366	Tpm1	tropomyosin 1, alpha [Source:MGI Symbol;Acc:MGI:98809]	R-MMU-390522	tropomyosin 1, alpha
ENSMUST00000029183.2	13.9362	-2.70959	6.54137	0.716753	-3.78037	0.000156595	0.00627322	ENSMUSG00000027654	Fam83d	family with sequence similarity 83, member D [Source:MGI Symbol;Acc:MGI:1919128]		family with sequence similarity 83, member D
ENSMUST00000121758.7	36.2084	-2.71537	6.56762	0.546283	-4.97063	6.67359e-07	0.000128776	ENSMUSG00000031075	Ano1	anoctamin 1, calcium activated chloride channel [Source:MGI Symbol;Acc:MGI:2142149]	R-MMU-382551	anoctamin 1, calcium activated chloride channel
ENSMUST00000168838.1	8.46729	-2.72832	6.62685	0.748628	-3.64443	0.000267984	0.00914222	ENSMUSG00000092008	Cyp2c69	cytochrome P450, family 2, subfamily c, polypeptide 69 [Source:MGI Symbol;Acc:MGI:3721049]	R-MMU-1430728	cytochrome P450, family 2, subfamily c, polypeptide 69
ENSMUST00000135469.7	36.236	-2.73457	6.65561	0.537095	-5.09141	3.55402e-07	7.9796e-05	ENSMUSG00000004085	Map3k20	mitogen-activated protein kinase kinase kinase 20 [Source:MGI Symbol;Acc:MGI:2443258]		mitogen-activated protein kinase kinase kinase 20
ENSMUST00000038160.5	62.4867	-2.76861	6.81453	0.502328	-5.51156	3.55661e-08	1.22633e-05	ENSMUSG00000036446	Lum	lumican [Source:MGI Symbol;Acc:MGI:109347]	R-MMU-1474244	lumican
ENSMUST00000193703.5	52.5227	-2.78299	6.88275	0.625851	-4.44672	8.71911e-06	0.000751595	ENSMUSG00000022995	Enah	enabled homolog (Drosophila) [Source:MGI Symbol;Acc:MGI:108360]	R-MMU-1266738	enabled homolog (Drosophila)
ENSMUST00000065086.5	21.9361	-2.80416	6.98452	0.58427	-4.79942	1.59125e-06	0.000229294	ENSMUSG00000052957	Gas1	growth arrest specific 1 [Source:MGI Symbol;Acc:MGI:95655]	R-MMU-162582	growth arrest specific 1
ENSMUST00000225748.1	36.2121	-2.80653	6.99601	0.641155	-4.37731	1.20155e-05	0.00095085	-
ENSMUST00000153101.6	31.4074	-2.81117	7.01853	0.545285	-5.15541	2.5308e-07	6.18571e-05	-
ENSMUST00000034522.7	55.8997	-2.81156	7.02045	0.581494	-4.83507	1.331e-06	0.000211872	ENSMUSG00000032024	Clmp	CXADR-like membrane protein [Source:MGI Symbol;Acc:MGI:1918816]		CXADR-like membrane protein
ENSMUST00000142448.7	31.2445	-2.81606	7.04234	0.655669	-4.29494	1.74744e-05	0.00126372	-
ENSMUST00000069902.12	11.0098	-2.82361	7.07933	0.744668	-3.79177	0.000149576	0.00611899	ENSMUSG00000025453	Nnt	nicotinamide nucleotide transhydrogenase [Source:MGI Symbol;Acc:MGI:109279]	R-MMU-1428517	nicotinamide nucleotide transhydrogenase
ENSMUST00000203615.2	23.7117	-2.83486	7.13472	0.77826	-3.64256	0.00026994	0.00918942	ENSMUSG00000030102	Itpr1	inositol 1,4,5-trisphosphate receptor 1 [Source:MGI Symbol;Acc:MGI:96623]	R-MMU-109582	inositol 1,4,5-trisphosphate receptor 1
ENSMUST00000036069.6	9.17632	-2.85154	7.2177	0.780908	-3.65157	0.000260644	0.00895511	ENSMUSG00000033207	Mamdc2	MAM domain containing 2 [Source:MGI Symbol;Acc:MGI:1918988]		MAM domain containing 2
ENSMUST00000102538.10	11.84	-2.87558	7.33897	0.74881	-3.84019	0.000122937	0.00526851	ENSMUSG00000027210	Meis2	Meis homeobox 2 [Source:MGI Symbol;Acc:MGI:108564]		Meis homeobox 2
ENSMUST00000168727.1	21.5152	-2.87942	7.35853	0.757833	-3.79954	0.000144965	0.0059556	ENSMUSG00000021943	Gdf10	growth differentiation factor 10 [Source:MGI Symbol;Acc:MGI:95684]		growth differentiation factor 10
ENSMUST00000102765.8	11.106	-2.88835	7.40424	0.769112	-3.75544	0.000173039	0.00675092	ENSMUSG00000063564	Col23a1	collagen, type XXIII, alpha 1 [Source:MGI Symbol;Acc:MGI:2653243]	R-MMU-1474244	collagen, type XXIII, alpha 1
ENSMUST00000114913.1	20.7579	-2.91195	7.52637	0.625217	-4.65751	3.20055e-06	0.000376265	ENSMUSG00000022840	Adcy5	adenylate cyclase 5 [Source:MGI Symbol;Acc:MGI:99673]	R-MMU-382551	adenylate cyclase 5
ENSMUST00000029451.11	18.2911	-2.91469	7.54063	0.597439	-4.87863	1.06824e-06	0.000178382	ENSMUSG00000027858	Tspan2	tetraspanin 2 [Source:MGI Symbol;Acc:MGI:1917997]		tetraspanin 2
ENSMUST00000185408.6	135.131	-2.92825	7.61185	0.791046	-3.70174	0.000214126	0.00780104	-
ENSMUST00000111332.1	46.9248	-2.9328	7.6359	0.7042	-4.16473	3.11728e-05	0.00191693	ENSMUSG00000038370	Pcp4l1	Purkinje cell protein 4-like 1 [Source:MGI Symbol;Acc:MGI:1913675]		Purkinje cell protein 4-like 1
ENSMUST00000035232.12	11.8193	-2.94403	7.69556	0.577421	-5.09858	3.42216e-07	7.84804e-05	ENSMUSG00000032609	Klhdc8b	kelch domain containing 8B [Source:MGI Symbol;Acc:MGI:1925517]		kelch domain containing 8B
ENSMUST00000078272.12	15.0139	-2.97395	7.85685	0.658282	-4.51774	6.25018e-06	0.000600421	ENSMUSG00000040118	Cacna2d1	calcium channel, voltage-dependent, alpha2/delta subunit 1 [Source:MGI Symbol;Acc:MGI:88295]		calcium channel, voltage-dependent, alpha2/delta subunit 1
ENSMUST00000057243.4	65.6966	-2.97925	7.88577	0.661514	-4.50369	6.67849e-06	0.000622971	ENSMUSG00000048572	Tmem252	transmembrane protein 252 [Source:MGI Symbol;Acc:MGI:3583948]		transmembrane protein 252
ENSMUST00000137908.1	29.8128	-3.01695	8.09453	0.825009	-3.65687	0.000255318	0.00883499	-
ENSMUST00000061111.9	70.3066	-3.02848	8.1595	0.584284	-5.18323	2.18075e-07	5.69029e-05	ENSMUSG00000044345	Marveld1	MARVEL (membrane-associating) domain containing 1 [Source:MGI Symbol;Acc:MGI:2147570]		MARVEL (membrane-associating) domain containing 1
ENSMUST00000206170.1	17.5656	-3.04666	8.26299	0.814138	-3.7422	0.000182418	0.00700259	ENSMUSG00000030682	Cdipt	CDP-diacylglycerol--inositol 3-phosphatidyltransferase (phosphatidylinositol synthase) [Source:MGI Symbol;Acc:MGI:105491]	R-MMU-1430728	CDP-diacylglycerol--inositol 3-phosphatidyltransferase (phosphatidylinositol synthase)
ENSMUST00000004208.6	31.6982	-3.05402	8.30525	0.646963	-4.72055	2.35204e-06	0.000308949	ENSMUSG00000004105	Angptl2	angiopoietin-like 2 [Source:MGI Symbol;Acc:MGI:1347002]		angiopoietin-like 2
ENSMUST00000047666.4	70.1748	-3.0815	8.46491	0.62172	-4.95641	7.18087e-07	0.000133322	ENSMUSG00000041731	Pgm5	phosphoglucomutase 5 [Source:MGI Symbol;Acc:MGI:1925668]		phosphoglucomutase 5
ENSMUST00000001304.8	273.207	-3.08934	8.51107	0.597862	-5.16732	2.37479e-07	6.03352e-05	ENSMUSG00000001270	Ckb	creatine kinase, brain [Source:MGI Symbol;Acc:MGI:88407]	R-MMU-1430728	creatine kinase, brain
ENSMUST00000048967.8	199.089	-3.09139	8.52316	0.72379	-4.27111	1.94502e-05	0.00135583	ENSMUSG00000037852	Cpe	carboxypeptidase E [Source:MGI Symbol;Acc:MGI:101932]	R-MMU-392499	carboxypeptidase E
ENSMUST00000089494.5	9.12089	-3.11651	8.67287	0.823	-3.78677	0.00015262	0.00617805	ENSMUSG00000050222	Il17d	interleukin 17D [Source:MGI Symbol;Acc:MGI:2446510]		interleukin 17D
ENSMUST00000195943.1	12.753	-3.11936	8.69	0.81828	-3.81209	0.000137797	0.00574668	ENSMUSG00000028949	Smarcd3	SWI/SNF related, matrix associated, actin dependent regulator of chromatin, subfamily d, member 3 [Source:MGI Symbol;Acc:MGI:1914243]	R-MMU-212436	SWI/SNF related, matrix associated, actin dependent regulator of chromatin, subfamily d, member 3
ENSMUST00000023568.13	15.35	-3.14744	8.86081	0.754582	-4.1711	3.03133e-05	0.00187602	ENSMUSG00000022860	Chodl	chondrolectin [Source:MGI Symbol;Acc:MGI:2179069]		chondrolectin
ENSMUST00000114195.7	15.9376	-3.1496	8.8741	0.744793	-4.22883	2.34912e-05	0.00154283	ENSMUSG00000053062	Jam2	junction adhesion molecule 2 [Source:MGI Symbol;Acc:MGI:1933820]	R-MMU-109582	junction adhesion molecule 2
ENSMUST00000025254.8	26.5856	-3.16791	8.98742	0.810397	-3.90908	9.26486e-05	0.00421922	ENSMUSG00000024395	Lims2	LIM and senescent cell antigen like domains 2 [Source:MGI Symbol;Acc:MGI:2385067]		LIM and senescent cell antigen like domains 2
ENSMUST00000057410.13	48.5516	-3.18783	9.1124	0.756852	-4.21196	2.53162e-05	0.0016327	ENSMUSG00000006369	Fbln1	fibulin 1 [Source:MGI Symbol;Acc:MGI:95487]	R-MMU-1474244	fibulin 1
ENSMUST00000040489.7	15.7617	-3.19816	9.17786	0.689804	-4.63633	3.54653e-06	0.00041006	ENSMUSG00000024727	Trpm6	transient receptor potential cation channel, subfamily M, member 6 [Source:MGI Symbol;Acc:MGI:2675603]	R-MMU-382551	transient receptor potential cation channel, subfamily M, member 6
ENSMUST00000023538.8	631.064	-3.22735	9.36549	0.505556	-6.38377	1.7278e-10	1.28316e-07	ENSMUSG00000022836	Mylk	myosin, light polypeptide kinase [Source:MGI Symbol;Acc:MGI:894806]	R-MMU-162582	myosin, light polypeptide kinase
ENSMUST00000039388.2	17.8568	-3.22908	9.37668	0.65124	-4.95835	7.10945e-07	0.000133278	ENSMUSG00000034936	Arl4d	ADP-ribosylation factor-like 4D [Source:MGI Symbol;Acc:MGI:1933155]		ADP-ribosylation factor-like 4D
ENSMUST00000089332.4	8.82017	-3.24426	9.4759	0.785458	-4.13041	3.62116e-05	0.00213825	ENSMUSG00000068196	Col8a1	collagen, type VIII, alpha 1 [Source:MGI Symbol;Acc:MGI:88463]	R-MMU-1474244	collagen, type VIII, alpha 1
ENSMUST00000155648.1	8.00455	-3.28022	9.71507	0.880653	-3.72477	0.000195496	0.00725002	-
ENSMUST00000020718.9	65.8303	-3.2846	9.74457	0.681527	-4.81947	1.43941e-06	0.000218847	ENSMUSG00000020439	Smtn	smoothelin [Source:MGI Symbol;Acc:MGI:1354727]		smoothelin
ENSMUST00000034590.3	2264.81	-3.29239	9.79731	0.703796	-4.67804	2.89632e-06	0.000359422	ENSMUSG00000032085	Tagln	transgelin [Source:MGI Symbol;Acc:MGI:106012]		transgelin
ENSMUST00000218813.1	17.9042	-3.31274	9.93652	0.816043	-4.05952	4.91742e-05	0.00266932	-
ENSMUST00000136521.1	19.4529	-3.31703	9.96612	0.805059	-4.12024	3.78484e-05	0.0022079	ENSMUSG00000053963	Stum	mechanosensory transduction mediator [Source:MGI Symbol;Acc:MGI:2138735]		mechanosensory transduction mediator
ENSMUST00000021820.13	51.6673	-3.32076	9.99191	0.718289	-4.62315	3.77949e-06	0.000426773	ENSMUSG00000021388	Aspn	asporin [Source:MGI Symbol;Acc:MGI:1913945]		asporin
ENSMUST00000139160.7	98.5206	-3.34173	10.1382	0.770134	-4.33916	1.4303e-05	0.00109161	ENSMUSG00000050315	Synpo2	synaptopodin 2 [Source:MGI Symbol;Acc:MGI:2153070]		synaptopodin 2
ENSMUST00000169409.2	29.6785	-3.3571	10.2468	0.597502	-5.61856	1.92551e-08	7.49303e-06	ENSMUSG00000026358	Rgs1	regulator of G-protein signaling 1 [Source:MGI Symbol;Acc:MGI:1354694]		regulator of G-protein signaling 1
ENSMUST00000087399.4	34.2828	-3.35763	10.2506	0.908301	-3.69661	0.000218496	0.00790064	ENSMUSG00000033327	Tnxb	tenascin XB [Source:MGI Symbol;Acc:MGI:1932137]		tenascin XB
ENSMUST00000202167.1	20.326	-3.38857	10.4728	0.772498	-4.38651	1.15183e-05	0.000922852	-
ENSMUST00000053087.3	34.7503	-3.39341	10.5079	0.726049	-4.6738	2.95677e-06	0.000361562	ENSMUSG00000042155	Klhl23	kelch-like 23 [Source:MGI Symbol;Acc:MGI:2683536]		kelch-like 23
ENSMUST00000144429.7	515.645	-3.44392	10.8823	0.659101	-5.22517	1.73997e-07	4.75412e-05	ENSMUSG00000031328	Flna	filamin, alpha [Source:MGI Symbol;Acc:MGI:95556]	R-MMU-109582	filamin, alpha
ENSMUST00000098614.8	5.34321	-3.44958	10.9252	0.922059	-3.74118	0.000183162	0.0070172	ENSMUSG00000071064	Zfp827	zinc finger protein 827 [Source:MGI Symbol;Acc:MGI:2444807]		zinc finger protein 827
ENSMUST00000034053.6	118.367	-3.49315	11.2601	0.842294	-4.14718	3.36591e-05	0.00202468	ENSMUSG00000031636	Pdlim3	PDZ and LIM domain 3 [Source:MGI Symbol;Acc:MGI:1859274]		PDZ and LIM domain 3
ENSMUST00000031249.7	277.846	-3.50409	11.3458	0.876053	-3.99986	6.33813e-05	0.00316235	ENSMUSG00000029309	Sparcl1	SPARC-like 1 [Source:MGI Symbol;Acc:MGI:108110]	R-MMU-392499	SPARC-like 1
ENSMUST00000044691.8	12.2216	-3.51393	11.4235	0.878907	-3.99807	6.38619e-05	0.00316423	ENSMUSG00000042215	Bag2	BCL2-associated athanogene 2 [Source:MGI Symbol;Acc:MGI:1891254]	R-MMU-2262752	BCL2-associated athanogene 2
ENSMUST00000108493.2	19.7726	-3.5265	11.5234	0.742273	-4.75095	2.02463e-06	0.000273382	ENSMUSG00000078794	Dact3	dishevelled-binding antagonist of beta-catenin 3 [Source:MGI Symbol;Acc:MGI:3654828]		dishevelled-binding antagonist of beta-catenin 3
ENSMUST00000191695.1	15.8838	-3.52663	11.5245	0.881651	-4.00003	6.33352e-05	0.00316235	-
ENSMUST00000126040.7	12.9876	-3.56022	11.796	0.965158	-3.68875	0.000225361	0.00803836	-
ENSMUST00000039631.8	1355.25	-3.57023	11.8781	0.723502	-4.93465	8.02941e-07	0.000142238	ENSMUSG00000035783	Acta2	actin, alpha 2, smooth muscle, aorta [Source:MGI Symbol;Acc:MGI:87909]	R-MMU-397014	actin, alpha 2, smooth muscle, aorta
ENSMUST00000048976.7	21.2474	-3.57628	11.928	0.883507	-4.04782	5.16965e-05	0.00275748	ENSMUSG00000033910	Gucy1a3	guanylate cyclase 1, soluble, alpha 3 [Source:MGI Symbol;Acc:MGI:1926562]		guanylate cyclase 1, soluble, alpha 3
ENSMUST00000112173.7	15.6186	-3.5858	12.007	0.867269	-4.13459	3.55593e-05	0.00210996	ENSMUSG00000030352	Tspan9	tetraspanin 9 [Source:MGI Symbol;Acc:MGI:1924558]		tetraspanin 9
ENSMUST00000085939.7	39.9848	-3.58961	12.0388	0.834041	-4.30388	1.67831e-05	0.00122624	ENSMUSG00000066705	Fxyd6	FXYD domain-containing ion transport regulator 6 [Source:MGI Symbol;Acc:MGI:1890226]	R-MMU-382551	FXYD domain-containing ion transport regulator 6
ENSMUST00000021822.6	63.4712	-3.61212	12.228	0.799501	-4.51797	6.24361e-06	0.000600421	ENSMUSG00000021390	Ogn	osteoglycin [Source:MGI Symbol;Acc:MGI:109278]	R-MMU-1430728	osteoglycin
ENSMUST00000172363.8	8.85395	-3.63628	12.4345	0.833356	-4.36341	1.28049e-05	0.000996976	-
ENSMUST00000165485.7	11.3109	-3.6375	12.4451	0.999452	-3.6395	0.000273172	0.00925383	ENSMUSG00000024909	Efemp2	epidermal growth factor-containing fibulin-like extracellular matrix protein 2 [Source:MGI Symbol;Acc:MGI:1891209]	R-MMU-1474244	epidermal growth factor-containing fibulin-like extracellular matrix protein 2
ENSMUST00000051676.6	6.40303	-3.66266	12.664	0.915553	-4.00049	6.32115e-05	0.00316235	ENSMUSG00000046694	Fam46b	family with sequence similarity 46, member B [Source:MGI Symbol;Acc:MGI:2140500]		family with sequence similarity 46, member B
ENSMUST00000123035.1	47.8444	-3.68442	12.8565	0.622559	-5.91819	3.25504e-09	1.65399e-06	-
ENSMUST00000057442.7	8.43964	-3.6969	12.9682	0.95122	-3.88649	0.000101706	0.0045777	ENSMUSG00000047842	Diras2	DIRAS family, GTP-binding RAS-like 2 [Source:MGI Symbol;Acc:MGI:1915453]		DIRAS family, GTP-binding RAS-like 2
ENSMUST00000069360.13	17.4822	-3.69826	12.9803	0.820166	-4.50916	6.50858e-06	0.000614051	ENSMUSG00000055653	Gpc3	glypican 3 [Source:MGI Symbol;Acc:MGI:104903]	R-MMU-162582	glypican 3
ENSMUST00000088552.6	1149.48	-3.7191	13.1692	0.70221	-5.29628	1.18183e-07	3.51076e-05	ENSMUSG00000067818	Myl9	myosin, light polypeptide 9, regulatory [Source:MGI Symbol;Acc:MGI:2138915]	R-MMU-162582	myosin, light polypeptide 9, regulatory
ENSMUST00000120564.1	20.8538	-3.74541	13.4116	1.01443	-3.69214	0.000222374	0.00799468	ENSMUSG00000039323	Igfbp2	insulin-like growth factor binding protein 2 [Source:MGI Symbol;Acc:MGI:96437]	R-MMU-392499	insulin-like growth factor binding protein 2
ENSMUST00000028106.10	8.28808	-3.75791	13.5283	0.897057	-4.18915	2.79999e-05	0.00176108	ENSMUSG00000026768	Itga8	integrin alpha 8 [Source:MGI Symbol;Acc:MGI:109442]	R-MMU-1474244	integrin alpha 8
ENSMUST00000137454.7	3.10754	-3.76114	13.5587	1.04012	-3.61605	0.000299131	0.00998535	ENSMUSG00000040111	Gramd1b	GRAM domain containing 1B [Source:MGI Symbol;Acc:MGI:1925037]		GRAM domain containing 1B
ENSMUST00000126264.1	42.5426	-3.76384	13.584	0.577833	-6.51371	7.33158e-11	6.57269e-08	-
ENSMUST00000127935.7	58.5012	-3.77943	13.7316	0.759482	-4.97632	6.48042e-07	0.000127684	ENSMUSG00000005611	Mrvi1	MRV integration site 1 [Source:MGI Symbol;Acc:MGI:1338023]	R-MMU-109582	MRV integration site 1
ENSMUST00000215509.1	3.24237	-3.7914	13.8461	1.03377	-3.66755	0.000244882	0.008566	ENSMUSG00000032085	Tagln	transgelin [Source:MGI Symbol;Acc:MGI:106012]		transgelin
ENSMUST00000165816.1	8.30731	-3.79351	13.8663	0.846047	-4.48381	7.33215e-06	0.000667814	-
ENSMUST00000153230.7	39.384	-3.80652	13.9919	0.73163	-5.2028	1.96306e-07	5.19244e-05	-
ENSMUST00000022051.13	13.1357	-3.80694	13.996	0.839162	-4.5366	5.71692e-06	0.000566092	ENSMUSG00000021567	Nkd2	naked cuticle 2 homolog (Drosophila) [Source:MGI Symbol;Acc:MGI:1919543]		naked cuticle 2 homolog (Drosophila)
ENSMUST00000049207.8	4.85716	-3.80997	14.0254	0.929409	-4.09935	4.14305e-05	0.00235983	ENSMUSG00000039427	Alg1	asparagine-linked glycosylation 1 (beta-1,4-mannosyltransferase) [Source:MGI Symbol;Acc:MGI:2384774]	R-MMU-392499	asparagine-linked glycosylation 1 (beta-1,4-mannosyltransferase)
ENSMUST00000044165.13	21.0983	-3.82871	14.2088	0.754726	-5.07298	3.91642e-07	8.59343e-05	ENSMUSG00000039115	Itga9	integrin alpha 9 [Source:MGI Symbol;Acc:MGI:104756]	R-MMU-1266738	integrin alpha 9
ENSMUST00000027997.8	452.291	-3.83044	14.2258	0.670182	-5.71552	1.09368e-08	4.79952e-06	ENSMUSG00000026678	Rgs5	regulator of G-protein signaling 5 [Source:MGI Symbol;Acc:MGI:1098434]		regulator of G-protein signaling 5
ENSMUST00000037942.10	16.2858	-3.84381	14.3582	0.770763	-4.98701	6.13197e-07	0.000123336	ENSMUSG00000036745	Ttll7	tubulin tyrosine ligase-like family, member 7 [Source:MGI Symbol;Acc:MGI:1918142]	R-MMU-392499	tubulin tyrosine ligase-like family, member 7
ENSMUST00000149431.1	12.9083	-3.84655	14.3856	0.898377	-4.28167	1.85494e-05	0.00133149	ENSMUSG00000021200	Asb2	ankyrin repeat and SOCS box-containing 2 [Source:MGI Symbol;Acc:MGI:1929743]	R-MMU-392499	ankyrin repeat and SOCS box-containing 2
ENSMUST00000101534.4	36.3568	-3.86138	14.5342	0.943379	-4.09314	4.25574e-05	0.00240275	ENSMUSG00000029838	Ptn	pleiotrophin [Source:MGI Symbol;Acc:MGI:97804]		pleiotrophin
ENSMUST00000027816.4	23.8039	-3.86601	14.581	0.812529	-4.758	1.9552e-06	0.000265865	ENSMUSG00000026531	Mptx1	mucosal pentraxin 1 [Source:MGI Symbol;Acc:MGI:1913539]		mucosal pentraxin 1
ENSMUST00000075161.11	1043.5	-3.89836	14.9116	0.801735	-4.86241	1.15964e-06	0.00019138	ENSMUSG00000059430	Actg2	actin, gamma 2, smooth muscle, enteric [Source:MGI Symbol;Acc:MGI:104589]	R-MMU-397014	actin, gamma 2, smooth muscle, enteric
ENSMUST00000143258.1	7.25342	-3.90026	14.9313	1.00721	-3.87233	0.000107799	0.00478504	ENSMUSG00000027750	Postn	periostin, osteoblast specific factor [Source:MGI Symbol;Acc:MGI:1926321]		periostin, osteoblast specific factor
ENSMUST00000219100.1	30.8702	-3.92076	15.1449	1.02876	-3.81114	0.000138326	0.00575631	-
ENSMUST00000058762.14	16.3849	-3.9527	15.484	1.0556	-3.74451	0.000180746	0.00696612	ENSMUSG00000026335	Pam	peptidylglycine alpha-amidating monooxygenase [Source:MGI Symbol;Acc:MGI:97475]		peptidylglycine alpha-amidating monooxygenase
ENSMUST00000107914.9	1640.14	-4.00748	16.0831	0.671801	-5.96527	2.44223e-09	1.36467e-06	ENSMUSG00000028464	Tpm2	tropomyosin 2, beta [Source:MGI Symbol;Acc:MGI:98810]	R-MMU-390522	tropomyosin 2, beta
ENSMUST00000141125.7	3.99071	-4.00855	16.0951	1.07347	-3.7342	0.000188314	0.0071146	-
ENSMUST00000033149.4	5.31704	-4.01718	16.1917	1.00166	-4.01052	6.05843e-05	0.00310298	ENSMUSG00000030862	Cpxm2	carboxypeptidase X 2 (M14 family) [Source:MGI Symbol;Acc:MGI:1926006]		carboxypeptidase X 2 (M14 family)
ENSMUST00000068981.12	16.5997	-4.04255	16.4789	0.933123	-4.33228	1.47574e-05	0.00112185	ENSMUSG00000020758	Itgb4	integrin beta 4 [Source:MGI Symbol;Acc:MGI:96613]	R-MMU-1474244	integrin beta 4
ENSMUST00000034328.12	5.44062	-4.08468	16.9673	1.00639	-4.05875	4.93351e-05	0.00266932	ENSMUSG00000031864	Ints10	integrator complex subunit 10 [Source:MGI Symbol;Acc:MGI:1918135]	R-MMU-73857	integrator complex subunit 10
ENSMUST00000172278.7	11.4528	-4.1028	17.1817	0.97431	-4.21098	2.54261e-05	0.0016327	ENSMUSG00000045613	Chrm2	cholinergic receptor, muscarinic 2, cardiac [Source:MGI Symbol;Acc:MGI:88397]	R-MMU-162582	cholinergic receptor, muscarinic 2, cardiac
ENSMUST00000112603.3	3.90842	-4.10404	17.1965	1.10187	-3.7246	0.000195622	0.00725002	ENSMUSG00000036815	Dpp10	dipeptidylpeptidase 10 [Source:MGI Symbol;Acc:MGI:2442409]		dipeptidylpeptidase 10
ENSMUST00000048770.14	26.4481	-4.12802	17.4846	0.872396	-4.73181	2.22524e-06	0.000294295	ENSMUSG00000040666	Sh3bgr	SH3-binding domain glutamic acid-rich protein [Source:MGI Symbol;Acc:MGI:1354740]		SH3-binding domain glutamic acid-rich protein
ENSMUST00000130235.7	6.3731	-4.13181	17.5307	1.05496	-3.91657	8.98189e-05	0.00411951	ENSMUSG00000021464	Ror2	receptor tyrosine kinase-like orphan receptor 2 [Source:MGI Symbol;Acc:MGI:1347521]	R-MMU-162582	receptor tyrosine kinase-like orphan receptor 2
ENSMUST00000075118.9	127.645	-4.14251	17.6612	0.729703	-5.67698	1.37091e-08	5.75455e-06	ENSMUSG00000020439	Smtn	smoothelin [Source:MGI Symbol;Acc:MGI:1354727]		smoothelin
ENSMUST00000033386.11	9.27957	-4.1588	17.8618	1.03783	-4.00722	6.14387e-05	0.00312189	ENSMUSG00000031070	Mrgprf	MAS-related GPR, member F [Source:MGI Symbol;Acc:MGI:2384823]		MAS-related GPR, member F
ENSMUST00000020362.2	11.7269	-4.16161	17.8966	0.943605	-4.41033	1.03212e-05	0.000860075	ENSMUSG00000020155	Kcnmb1	potassium large conductance calcium-activated channel, subfamily M, beta member 1 [Source:MGI Symbol;Acc:MGI:1334203]	R-MMU-112316	potassium large conductance calcium-activated channel, subfamily M, beta member 1
ENSMUST00000223450.1	15.1406	-4.1858	18.1991	0.914514	-4.57708	4.71522e-06	0.000499145	ENSMUSG00000062929	Cfl2	cofilin 2, muscle [Source:MGI Symbol;Acc:MGI:101763]		cofilin 2, muscle
ENSMUST00000042790.4	2.80555	-4.18763	18.2223	1.12367	-3.72675	0.000193967	0.00721641	ENSMUSG00000038086	Hspb2	heat shock protein 2 [Source:MGI Symbol;Acc:MGI:1916503]		heat shock protein 2
ENSMUST00000042842.5	7.95902	-4.1948	18.313	0.948568	-4.42224	9.7682e-06	0.000820062	ENSMUSG00000038119	Cdon	cell adhesion molecule-related/down-regulated by oncogenes [Source:MGI Symbol;Acc:MGI:1926387]	R-MMU-1266738	cell adhesion molecule-related/down-regulated by oncogenes
ENSMUST00000092857.12	2.75201	-4.21505	18.5719	1.06776	-3.94758	7.89462e-05	0.003733	ENSMUSG00000017686	Rhot1	ras homolog family member T1 [Source:MGI Symbol;Acc:MGI:1926078]	R-MMU-162582	ras homolog family member T1
ENSMUST00000059352.2	67.7021	-4.22086	18.6468	1.10387	-3.82368	0.000131477	0.00554298	ENSMUSG00000048096	Lmod1	leiomodin 1 (smooth muscle) [Source:MGI Symbol;Acc:MGI:2135671]	R-MMU-397014	leiomodin 1 (smooth muscle)
ENSMUST00000001384.5	1101.62	-4.22574	18.71	0.649062	-6.51053	7.4887e-11	6.57269e-08	ENSMUSG00000001349	Cnn1	calponin 1 [Source:MGI Symbol;Acc:MGI:104979]		calponin 1
ENSMUST00000036737.3	17.7552	-4.26726	19.2564	0.864548	-4.93583	7.981e-07	0.000142238	ENSMUSG00000038591	Colec10	collectin sub-family member 10 [Source:MGI Symbol;Acc:MGI:3606482]	R-MMU-168249	collectin sub-family member 10
ENSMUST00000131648.7	9.5765	-4.28894	19.5479	1.13904	-3.7654	0.000166285	0.00656607	-
ENSMUST00000017408.13	7.07094	-4.2949	19.6288	1.01512	-4.23093	2.32729e-05	0.00153371	ENSMUSG00000017264	Exosc10	exosome component 10 [Source:MGI Symbol;Acc:MGI:1355322]	R-MMU-8953854	exosome component 10
ENSMUST00000026409.4	2.99085	-4.33108	20.1273	1.12753	-3.84122	0.000122424	0.00526477	ENSMUSG00000025353	Ormdl2	ORM1-like 2 (S. cerevisiae) [Source:MGI Symbol;Acc:MGI:1914094]	R-MMU-1430728	ORM1-like 2 (S. cerevisiae)
ENSMUST00000094456.9	3.06579	-4.33837	20.2293	1.07506	-4.03549	5.4489e-05	0.00284359	ENSMUSG00000027457	Snph	syntaphilin [Source:MGI Symbol;Acc:MGI:2139270]		syntaphilin
ENSMUST00000110969.4	3.05929	-4.35217	20.4237	1.03301	-4.21312	2.5187e-05	0.001632	ENSMUSG00000079157	Fam155a	family with sequence similarity 155, member A [Source:MGI Symbol;Acc:MGI:2142765]		family with sequence similarity 155, member A
ENSMUST00000066610.7	4.99145	-4.36967	20.673	1.05484	-4.14249	3.43548e-05	0.00205374	ENSMUSG00000048458	Fam212b	family with sequence similarity 212, member B [Source:MGI Symbol;Acc:MGI:1923497]		family with sequence similarity 212, member B
ENSMUST00000107215.8	3.16311	-4.37052	20.6851	1.18403	-3.69124	0.000223167	0.00799468	ENSMUSG00000028484	Psip1	PC4 and SFRS1 interacting protein 1 [Source:MGI Symbol;Acc:MGI:2142116]		PC4 and SFRS1 interacting protein 1
ENSMUST00000129543.1	19.935	-4.37097	20.6916	0.948956	-4.60609	4.10318e-06	0.000452733	-
ENSMUST00000098873.10	4.71348	-4.37399	20.735	1.15112	-3.79978	0.000144825	0.0059556	ENSMUSG00000038766	Gabpb2	GA repeat binding protein, beta 2 [Source:MGI Symbol;Acc:MGI:95612]		GA repeat binding protein, beta 2
ENSMUST00000026128.9	3.19488	-4.38208	20.8515	1.17374	-3.73342	0.0001889	0.0071146	ENSMUSG00000025135	Anapc11	anaphase promoting complex subunit 11 [Source:MGI Symbol;Acc:MGI:1913406]	R-MMU-1640170	anaphase promoting complex subunit 11
ENSMUST00000101617.8	44.2074	-4.39615	21.0559	0.680736	-6.45794	1.06137e-10	8.91043e-08	ENSMUSG00000068699	Flnc	filamin C, gamma [Source:MGI Symbol;Acc:MGI:95557]	R-MMU-1500931	filamin C, gamma
ENSMUST00000046221.7	41.2017	-4.41201	21.2886	0.892632	-4.9427	7.70498e-07	0.000140354	ENSMUSG00000038583	Pln	phospholamban [Source:MGI Symbol;Acc:MGI:97622]	R-MMU-382551	phospholamban
ENSMUST00000052164.3	4.95154	-4.42836	21.5313	1.10742	-3.9988	6.36644e-05	0.00316423	ENSMUSG00000048337	Npy4r	neuropeptide Y receptor Y4 [Source:MGI Symbol;Acc:MGI:105374]	R-MMU-162582	neuropeptide Y receptor Y4
ENSMUST00000079961.13	5.15264	-4.44275	21.7471	1.0205	-4.3535	1.33984e-05	0.00102662	ENSMUSG00000032939	Nup93	nucleoporin 93 [Source:MGI Symbol;Acc:MGI:1919055]	R-MMU-1640170	nucleoporin 93
ENSMUST00000194612.5	3.34979	-4.45243	21.8935	1.12473	-3.95868	7.53646e-05	0.00360202	ENSMUSG00000026471	Mr1	major histocompatibility complex, class I-related [Source:MGI Symbol;Acc:MGI:1195463]		major histocompatibility complex, class I-related
ENSMUST00000093772.3	11.4694	-4.46067	22.0189	1.11127	-4.01404	5.96881e-05	0.00306521	ENSMUSG00000013419	Zfp651	zinc finger protein 651 [Source:MGI Symbol;Acc:MGI:2670992]		zinc finger protein 651
ENSMUST00000105825.7	5.27601	-4.46829	22.1355	1.01653	-4.39565	1.10444e-05	0.000903625	ENSMUSG00000028759	Hp1bp3	heterochromatin protein 1, binding protein 3 [Source:MGI Symbol;Acc:MGI:109369]		heterochromatin protein 1, binding protein 3
ENSMUST00000216920.1	14.4556	-4.46922	22.1498	0.97708	-4.57406	4.78367e-06	0.000499145	ENSMUSG00000111628	AC174648.1
ENSMUST00000081544.12	14.4556	-4.46922	22.1498	0.97708	-4.57406	4.78367e-06	0.000499145	ENSMUSG00000041670	Rims1	regulating synaptic membrane exocytosis 1 [Source:MGI Symbol;Acc:MGI:2152971]	R-MMU-112315
ENSMUST00000133786.1	3.28203	-4.47717	22.2722	1.1872	-3.77119	0.000162469	0.0064417	-
ENSMUST00000029658.13	24.7294	-4.49419	22.5364	0.744719	-6.03475	1.59212e-09	9.60697e-07	ENSMUSG00000028024	Enpep	glutamyl aminopeptidase [Source:MGI Symbol;Acc:MGI:106645]	R-MMU-392499	glutamyl aminopeptidase
ENSMUST00000031093.4	5.36261	-4.50309	22.676	1.07325	-4.19573	2.71989e-05	0.00172758	ENSMUSG00000029193	Cckar	cholecystokinin A receptor [Source:MGI Symbol;Acc:MGI:99478]	R-MMU-162582	cholecystokinin A receptor
ENSMUST00000142080.1	3.42772	-4.51034	22.7902	1.09384	-4.12341	3.73307e-05	0.0021843	ENSMUSG00000057406	Nsd2	nuclear receptor binding SET domain protein 2 [Source:MGI Symbol;Acc:MGI:1276574]	R-MMU-1640170	nuclear receptor binding SET domain protein 2
ENSMUST00000027409.9	2259.36	-4.51101	22.8007	0.745979	-6.0471	1.47476e-09	9.18587e-07	ENSMUSG00000026208	Des	desmin [Source:MGI Symbol;Acc:MGI:94885]	R-MMU-390522	desmin
ENSMUST00000113587.7	11.6651	-4.51789	22.9098	1.05875	-4.26718	1.97957e-05	0.00137495	ENSMUSG00000026207	Speg	SPEG complex locus [Source:MGI Symbol;Acc:MGI:109282]		SPEG complex locus
ENSMUST00000198584.1	106.874	-4.56338	23.6436	0.832949	-5.47858	4.28751e-08	1.42737e-05	ENSMUSG00000050315	Synpo2	synaptopodin 2 [Source:MGI Symbol;Acc:MGI:2153070]		synaptopodin 2
ENSMUST00000090287.3	1101.12	-4.56406	23.6548	0.837199	-5.45159	4.99225e-08	1.60659e-05	ENSMUSG00000018830	Myh11	myosin, heavy polypeptide 11, smooth muscle [Source:MGI Symbol;Acc:MGI:102643]	R-MMU-162582	myosin, heavy polypeptide 11, smooth muscle
ENSMUST00000108473.9	77.3464	-4.58464	23.9946	1.04211	-4.3994	1.08552e-05	0.00089574	ENSMUSG00000030409	Dmpk	dystrophia myotonica-protein kinase [Source:MGI Symbol;Acc:MGI:94906]	R-MMU-397014	dystrophia myotonica-protein kinase
ENSMUST00000044048.7	42.34	-4.60564	24.3465	1.03363	-4.45579	8.35846e-06	0.000733607	ENSMUSG00000036854	Hspb6	heat shock protein, alpha-crystallin-related, B6 [Source:MGI Symbol;Acc:MGI:2685325]		heat shock protein, alpha-crystallin-related, B6
ENSMUST00000156766.7	65.9506	-4.61254	24.4632	0.813922	-5.66706	1.45269e-08	5.92167e-06	-
ENSMUST00000075980.11	3.8827	-4.65646	25.2193	1.11461	-4.17765	2.94538e-05	0.00184053	ENSMUSG00000020895	Tmem107	transmembrane protein 107 [Source:MGI Symbol;Acc:MGI:1914160]		transmembrane protein 107
ENSMUST00000055872.2	3.95189	-4.6905	25.8214	1.12998	-4.15095	3.31093e-05	0.0020104	ENSMUSG00000020793	Galr2	galanin receptor 2 [Source:MGI Symbol;Acc:MGI:1337018]	R-MMU-162582	galanin receptor 2
ENSMUST00000047328.10	26.9661	-4.70123	26.0142	1.18225	-3.97651	6.99341e-05	0.00336748	ENSMUSG00000039323	Igfbp2	insulin-like growth factor binding protein 2 [Source:MGI Symbol;Acc:MGI:96437]	R-MMU-392499	insulin-like growth factor binding protein 2
ENSMUST00000177457.7	4.0185	-4.73918	26.7077	1.013	-4.67838	2.89155e-06	0.000359422	ENSMUSG00000026657	Frmd4a	FERM domain containing 4A [Source:MGI Symbol;Acc:MGI:1919850]		FERM domain containing 4A
ENSMUST00000019920.12	6.35781	-4.75748	27.0486	1.2147	-3.91661	8.98044e-05	0.00411951	ENSMUSG00000019785	Clvs2	clavesin 2 [Source:MGI Symbol;Acc:MGI:2443223]	R-MMU-199991	clavesin 2
ENSMUST00000216755.1	28.2269	-4.7613	27.1202	0.823169	-5.78411	7.28976e-09	3.35138e-06	ENSMUSG00000032060	Cryab	crystallin, alpha B [Source:MGI Symbol;Acc:MGI:88516]	R-MMU-2262752	crystallin, alpha B
ENSMUST00000221372.1	4.06588	-4.76292	27.1507	1.06108	-4.48874	7.16448e-06	0.000658756	ENSMUSG00000059669	Taf1b	TATA-box binding protein associated factor, RNA polymerase I, B [Source:MGI Symbol;Acc:MGI:109577]	R-MMU-74160	TATA-box binding protein associated factor, RNA polymerase I, B
ENSMUST00000201769.3	4.15631	-4.76612	27.211	1.06742	-4.46509	8.00366e-06	0.000712179	ENSMUSG00000053134	Supt7l	suppressor of Ty 7-like [Source:MGI Symbol;Acc:MGI:1919445]		suppressor of Ty 7-like
ENSMUST00000029499.14	4.18881	-4.77263	27.3342	1.11703	-4.27261	1.932e-05	0.00135249	ENSMUSG00000027894	Slc6a17	solute carrier family 6 (neurotransmitter transporter), member 17 [Source:MGI Symbol;Acc:MGI:2442535]		solute carrier family 6 (neurotransmitter transporter), member 17
ENSMUST00000179759.1	16.8625	-4.77559	27.3903	0.984253	-4.852	1.22224e-06	0.000198322	ENSMUSG00000024049	Myom1	myomesin 1 [Source:MGI Symbol;Acc:MGI:1341430]		myomesin 1
ENSMUST00000167327.1	8.79687	-4.78524	27.574	1.0446	-4.58092	4.62939e-06	0.000499145	ENSMUSG00000015143	Actn1	actinin, alpha 1 [Source:MGI Symbol;Acc:MGI:2137706]	R-MMU-109582	actinin, alpha 1
ENSMUST00000050312.2	6.29264	-4.79984	27.8546	0.976581	-4.91494	8.88086e-07	0.000154487	ENSMUSG00000027223	Mapk8ip1	mitogen-activated protein kinase 8 interacting protein 1 [Source:MGI Symbol;Acc:MGI:1309464]		mitogen-activated protein kinase 8 interacting protein 1
ENSMUST00000043094.12	20.8346	-4.81981	28.2427	0.930407	-5.18032	2.21507e-07	5.70277e-05	ENSMUSG00000038209	Itln1	intelectin 1 (galactofuranose binding) [Source:MGI Symbol;Acc:MGI:1333831]	R-MMU-168249	intelectin 1 (galactofuranose binding)
ENSMUST00000091892.3	24.7882	-4.82774	28.3984	1.02437	-4.71289	2.44222e-06	0.000318628	ENSMUSG00000069372	Ctxn3	cortexin 3 [Source:MGI Symbol;Acc:MGI:3642816]		cortexin 3
ENSMUST00000075477.7	4.36039	-4.8345	28.5319	1.18194	-4.09032	4.3077e-05	0.002425	ENSMUSG00000062694	Cav3	caveolin 3 [Source:MGI Symbol;Acc:MGI:107570]	R-MMU-397014	caveolin 3
ENSMUST00000165602.8	42.8059	-4.83571	28.5558	0.723613	-6.68273	2.34531e-11	2.51587e-08	ENSMUSG00000026463	Atp2b4	ATPase, Ca++ transporting, plasma membrane 4 [Source:MGI Symbol;Acc:MGI:88111]	R-MMU-382551	ATPase, Ca++ transporting, plasma membrane 4
ENSMUST00000169179.2	4.58192	-4.91098	30.0852	1.11836	-4.39122	1.12715e-05	0.000913776	ENSMUSG00000031661	Nkd1	naked cuticle 1 homolog (Drosophila) [Source:MGI Symbol;Acc:MGI:2135954]		naked cuticle 1 homolog (Drosophila)
ENSMUST00000145069.2	6.86643	-4.9205	30.2844	1.16855	-4.21076	2.54515e-05	0.0016327	ENSMUSG00000040666	Sh3bgr	SH3-binding domain glutamic acid-rich protein [Source:MGI Symbol;Acc:MGI:1354740]		SH3-binding domain glutamic acid-rich protein
ENSMUST00000024107.6	21.1741	-4.94793	30.8657	0.880848	-5.61724	1.94029e-08	7.49303e-06	ENSMUSG00000023336	Wfdc1	WAP four-disulfide core domain 1 [Source:MGI Symbol;Acc:MGI:1915116]		WAP four-disulfide core domain 1
ENSMUST00000099626.4	30.1317	-4.95003	30.9106	0.82579	-5.99429	2.0437e-09	1.19581e-06	ENSMUSG00000074971	Fibin	fin bud initiation factor homolog (zebrafish) [Source:MGI Symbol;Acc:MGI:1914856]		fin bud initiation factor homolog (zebrafish)
ENSMUST00000098761.9	4.86325	-4.99498	31.8889	1.14307	-4.36979	1.24368e-05	0.00097619	ENSMUSG00000040896	Kcnd3	potassium voltage-gated channel, Shal-related family, member 3 [Source:MGI Symbol;Acc:MGI:1928743]	R-MMU-112316	potassium voltage-gated channel, Shal-related family, member 3
ENSMUST00000182715.7	4.71317	-5.01115	32.2484	1.02128	-4.90673	9.26063e-07	0.000158242	ENSMUSG00000002342	Tmem161a	transmembrane protein 161A [Source:MGI Symbol;Acc:MGI:2384577]		transmembrane protein 161A
ENSMUST00000030056.11	70.0539	-5.02363	32.5284	1.27792	-3.93111	8.45543e-05	0.00394362	ENSMUSG00000028364	Tnc	tenascin C [Source:MGI Symbol;Acc:MGI:101922]	R-MMU-392499	tenascin C
ENSMUST00000070951.7	5.18643	-5.08675	33.9833	1.1485	-4.42905	9.4647e-06	0.000801553	ENSMUSG00000021759	Plpp1	phospholipid phosphatase 1 [Source:MGI Symbol;Acc:MGI:108412]	R-MMU-1430728	phospholipid phosphatase 1
ENSMUST00000111581.2	8.11341	-5.14815	35.4608	1.04377	-4.93226	8.12842e-07	0.000142683	ENSMUSG00000033565	Rbfox2	RNA binding protein, fox-1 homolog (C. elegans) 2 [Source:MGI Symbol;Acc:MGI:1933973]	R-MMU-162582	RNA binding protein, fox-1 homolog (C. elegans) 2
ENSMUST00000208231.1	189.836	-5.15231	35.563	0.729563	-7.06218	1.63915e-12	2.43464e-09	ENSMUSG00000030554	Synm	synemin, intermediate filament protein [Source:MGI Symbol;Acc:MGI:2661187]		synemin, intermediate filament protein
ENSMUST00000020159.14	5.57812	-5.21942	37.2565	1.0225	-5.10458	3.31525e-07	7.71256e-05	ENSMUSG00000019984	Med23	mediator complex subunit 23 [Source:MGI Symbol;Acc:MGI:1917458]	R-MMU-212436	mediator complex subunit 23
ENSMUST00000121377.7	5.58432	-5.23948	37.7782	1.08941	-4.80949	1.51317e-06	0.000224064	ENSMUSG00000039804	Ncoa5	nuclear receptor coactivator 5 [Source:MGI Symbol;Acc:MGI:2385165]		nuclear receptor coactivator 5
ENSMUST00000214378.1	5.66763	-5.25125	38.0877	1.09082	-4.81406	1.47895e-06	0.000221373	ENSMUSG00000111714	Mtch2	mitochondrial carrier 2 [Source:MGI Symbol;Acc:MGI:1929260]		mitochondrial carrier 2
ENSMUST00000150232.7	5.66763	-5.25125	38.0877	1.09082	-4.81406	1.47895e-06	0.000221373	ENSMUSG00000027282	Mtch2	mitochondrial carrier 2 [Source:MGI Symbol;Acc:MGI:1929260]		mitochondrial carrier 2
ENSMUST00000044752.5	8.6899	-5.25941	38.3037	1.12808	-4.66229	3.12717e-06	0.000375047	ENSMUSG00000039481	Nrtn	neurturin [Source:MGI Symbol;Acc:MGI:108417]	R-MMU-1266738	neurturin
ENSMUST00000165079.7	5.84828	-5.26027	38.3264	1.00535	-5.23227	1.67442e-07	4.6857e-05	ENSMUSG00000002803	Btbd6	BTB (POZ) domain containing 6 [Source:MGI Symbol;Acc:MGI:3026623]	R-MMU-392499	BTB (POZ) domain containing 6
ENSMUST00000125541.1	6.26988	-5.37056	41.3714	1.11101	-4.83393	1.33867e-06	0.000211872	ENSMUSG00000056596	Trnp1	TMF1-regulated nuclear protein 1 [Source:MGI Symbol;Acc:MGI:1916789]		TMF1-regulated nuclear protein 1
ENSMUST00000120346.7	9.43646	-5.41164	42.5662	1.05556	-5.12679	2.94725e-07	7.02574e-05	ENSMUSG00000052712	BC004004	cDNA sequence BC004004 [Source:MGI Symbol;Acc:MGI:2136782]		cDNA sequence BC004004
ENSMUST00000111222.1	6.48748	-5.41256	42.5935	1.06196	-5.09678	3.45478e-07	7.84804e-05	ENSMUSG00000048058	Ldlrad3	low density lipoprotein receptor class A domain containing 3 [Source:MGI Symbol;Acc:MGI:2138856]		low density lipoprotein receptor class A domain containing 3
ENSMUST00000219655.1	13.4101	-5.43144	43.1546	1.13532	-4.78407	1.71781e-06	0.000243891	-
ENSMUST00000003643.2	43.0273	-5.47627	44.5165	0.791492	-6.91892	4.55103e-12	5.8584e-09	ENSMUSG00000030399	Ckm	creatine kinase, muscle [Source:MGI Symbol;Acc:MGI:88413]	R-MMU-1430728	creatine kinase, muscle
ENSMUST00000121731.7	741.686	-5.54446	46.6711	1.09786	-5.05022	4.41297e-07	9.57417e-05	ENSMUSG00000059430	Actg2	actin, gamma 2, smooth muscle, enteric [Source:MGI Symbol;Acc:MGI:104589]	R-MMU-397014	actin, gamma 2, smooth muscle, enteric
ENSMUST00000080893.6	11.0439	-5.56887	47.4677	1.15348	-4.8279	1.37982e-06	0.000213144	ENSMUSG00000035557	Krt17	keratin 17 [Source:MGI Symbol;Acc:MGI:96691]	R-MMU-1266738	keratin 17
ENSMUST00000199300.4	7.16779	-5.57032	47.5153	1.23218	-4.52069	6.16394e-06	0.000598088	ENSMUSG00000053819	Camk2d	calcium/calmodulin-dependent protein kinase II, delta [Source:MGI Symbol;Acc:MGI:1341265]	R-MMU-1266738	calcium/calmodulin-dependent protein kinase II, delta
ENSMUST00000079934.11	7.26222	-5.60429	48.6474	0.972674	-5.76173	8.32538e-09	3.73848e-06	ENSMUSG00000033943	Mga	MAX gene associated [Source:MGI Symbol;Acc:MGI:1352483]		MAX gene associated
ENSMUST00000119154.7	7.82237	-5.68626	51.4914	1.02131	-5.56762	2.58242e-08	9.40829e-06	ENSMUSG00000054814	Usp46	ubiquitin specific peptidase 46 [Source:MGI Symbol;Acc:MGI:1916977]		ubiquitin specific peptidase 46
ENSMUST00000163231.7	8.03852	-5.75094	53.8524	1.1008	-5.2243	1.74811e-07	4.75412e-05	ENSMUSG00000042350	Arel1	apoptosis resistant E3 ubiquitin protein ligase 1 [Source:MGI Symbol;Acc:MGI:1915747]		apoptosis resistant E3 ubiquitin protein ligase 1
ENSMUST00000028177.10	8.28673	-5.79276	55.4363	1.58098	-3.66402	0.000248285	0.00865369	ENSMUSG00000026833	Olfm1	olfactomedin 1 [Source:MGI Symbol;Acc:MGI:1860437]		olfactomedin 1
ENSMUST00000220427.1	29.1407	-5.80477	55.8997	1.02471	-5.66479	1.47206e-08	5.92167e-06	ENSMUSG00000090841	Myl6	myosin, light polypeptide 6, alkali, smooth muscle and non-muscle [Source:MGI Symbol;Acc:MGI:109318]	R-MMU-162582	myosin, light polypeptide 6, alkali, smooth muscle and non-muscle
ENSMUST00000129603.3	8.87837	-5.88493	59.0936	1.47934	-3.97808	6.94748e-05	0.00335372	ENSMUSG00000054641	Mmrn1	multimerin 1 [Source:MGI Symbol;Acc:MGI:1918195]	R-MMU-109582	multimerin 1
ENSMUST00000073860.5	8.91627	-5.8868	59.1704	1.28828	-4.56951	4.88872e-06	0.000499451	ENSMUSG00000060615	Ang4	angiogenin, ribonuclease A family, member 4 [Source:MGI Symbol;Acc:MGI:2656551]	R-MMU-1500931	angiogenin, ribonuclease A family, member 4
ENSMUST00000203954.2	9.39914	-5.97499	62.9003	1.36337	-4.38252	1.17313e-05	0.000932178	ENSMUSG00000004980	Hnrnpa2b1	heterogeneous nuclear ribonucleoprotein A2/B1 [Source:MGI Symbol;Acc:MGI:104819]	R-MMU-72163	heterogeneous nuclear ribonucleoprotein A2/B1
ENSMUST00000062069.5	9.59366	-5.98673	63.4142	1.20726	-4.95893	7.08826e-07	0.000133278	ENSMUSG00000047250	Ptgs1	prostaglandin-endoperoxide synthase 1 [Source:MGI Symbol;Acc:MGI:97797]	R-MMU-1430728	prostaglandin-endoperoxide synthase 1
ENSMUST00000023494.12	14.9847	-6.0323	65.4489	1.0816	-5.57722	2.44393e-08	9.07499e-06	ENSMUSG00000022803	Popdc2	popeye domain containing 2 [Source:MGI Symbol;Acc:MGI:1930150]		popeye domain containing 2
ENSMUST00000154199.7	10.3143	-6.09941	68.5654	1.21897	-5.00372	5.62336e-07	0.000115512	ENSMUSG00000030409	Dmpk	dystrophia myotonica-protein kinase [Source:MGI Symbol;Acc:MGI:94906]	R-MMU-397014	dystrophia myotonica-protein kinase
ENSMUST00000160144.8	10.1876	-6.1026	68.7172	1.03639	-5.88833	3.90112e-09	1.93146e-06	ENSMUSG00000038876	Rnf146	ring finger protein 146 [Source:MGI Symbol;Acc:MGI:1915281]	R-MMU-162582	ring finger protein 146
ENSMUST00000191104.6	98.3286	-6.17864	72.4361	1.23963	-4.98427	6.21947e-07	0.000123806	ENSMUSG00000055322	Tns1	tensin 1 [Source:MGI Symbol;Acc:MGI:104552]		tensin 1
ENSMUST00000107362.9	10.8632	-6.18234	72.6225	1.63205	-3.78809	0.000151807	0.00615807	ENSMUSG00000030530	Furin	furin (paired basic amino acid cleaving enzyme) [Source:MGI Symbol;Acc:MGI:97513]	R-MMU-174824	furin (paired basic amino acid cleaving enzyme)
ENSMUST00000153931.7	10.8593	-6.18418	72.7151	1.66335	-3.71791	0.000200877	0.00738808	ENSMUSG00000058835	Abi1	abl-interactor 1 [Source:MGI Symbol;Acc:MGI:104913]	R-MMU-162582	abl-interactor 1
ENSMUST00000163326.7	11.2658	-6.2305	75.0873	1.71642	-3.62993	0.000283499	0.00955338	ENSMUSG00000020788	Atp2a3	ATPase, Ca++ transporting, ubiquitous [Source:MGI Symbol;Acc:MGI:1194503]	R-MMU-382551	ATPase, Ca++ transporting, ubiquitous
ENSMUST00000021004.13	11.4048	-6.23697	75.4251	1.09281	-5.70726	1.14809e-08	4.92633e-06	ENSMUSG00000020672	Sntg2	syntrophin, gamma 2 [Source:MGI Symbol;Acc:MGI:1919541]		syntrophin, gamma 2
ENSMUST00000073012.12	12.2121	-6.33406	80.6756	1.0159	-6.23495	4.51911e-10	3.00895e-07	ENSMUSG00000027750	Postn	periostin, osteoblast specific factor [Source:MGI Symbol;Acc:MGI:1926321]		periostin, osteoblast specific factor
ENSMUST00000177068.7	12.7094	-6.39174	83.9664	1.07187	-5.96319	2.47364e-09	1.36467e-06	ENSMUSG00000046691	Chtf8	CTF8, chromosome transmission fidelity factor 8 [Source:MGI Symbol;Acc:MGI:2443370]		CTF8, chromosome transmission fidelity factor 8
ENSMUST00000164930.7	13.1269	-6.45612	87.7982	1.59807	-4.03994	5.34645e-05	0.00281293	ENSMUSG00000032479	Map4	microtubule-associated protein 4 [Source:MGI Symbol;Acc:MGI:97178]		microtubule-associated protein 4
ENSMUST00000169438.7	13.4286	-6.48919	89.8339	1.67306	-3.87864	0.000105044	0.00468429	ENSMUSG00000022565	Plec	plectin [Source:MGI Symbol;Acc:MGI:1277961]	R-MMU-1474244	plectin
ENSMUST00000166980.8	13.9242	-6.54111	93.126	1.65374	-3.95536	7.64209e-05	0.00364348	ENSMUSG00000003534	Ddr1	discoidin domain receptor family, member 1 [Source:MGI Symbol;Acc:MGI:99216]	R-MMU-1474244	discoidin domain receptor family, member 1
ENSMUST00000055844.9	14.1391	-6.54551	93.4101	1.10255	-5.93671	2.90794e-09	1.55971e-06	ENSMUSG00000032387	Rbpms2	RNA binding protein with multiple splicing 2 [Source:MGI Symbol;Acc:MGI:1919223]		RNA binding protein with multiple splicing 2
ENSMUST00000191473.6	14.0617	-6.54997	93.6997	1.18467	-5.52894	3.22165e-08	1.13103e-05	ENSMUSG00000031586	Rbpms	RNA binding protein gene with multiple splicing [Source:MGI Symbol;Acc:MGI:1334446]		RNA binding protein gene with multiple splicing
ENSMUST00000019683.10	15.812	-6.71527	105.074	1.02921	-6.5247	6.81395e-11	6.57269e-08	ENSMUSG00000019539	Rcn3	reticulocalbin 3, EF-hand calcium binding domain [Source:MGI Symbol;Acc:MGI:1277122]		reticulocalbin 3, EF-hand calcium binding domain
ENSMUST00000115477.7	17.524	-6.86162	116.293	1.05287	-6.51704	7.17099e-11	6.57269e-08	ENSMUSG00000029563	Foxp2	forkhead box P2 [Source:MGI Symbol;Acc:MGI:2148705]		forkhead box P2
ENSMUST00000108042.2	19.2285	-7.00361	128.321	1.69408	-4.13418	3.56232e-05	0.00210996	ENSMUSG00000073889	Il11ra1	interleukin 11 receptor, alpha chain 1 [Source:MGI Symbol;Acc:MGI:107426]	R-MMU-1280215	interleukin 11 receptor, alpha chain 1
ENSMUST00000109411.7	30.4302	-7.05567	133.036	1.58653	-4.44724	8.69795e-06	0.000751595	ENSMUSG00000017950	Hnf4a	hepatic nuclear factor 4, alpha [Source:MGI Symbol;Acc:MGI:109128]	R-MMU-1266738	hepatic nuclear factor 4, alpha
ENSMUST00000085651.11	21.1079	-7.14077	141.119	1.02804	-6.94604	3.75684e-12	5.18149e-09	ENSMUSG00000032336	Nptn	neuroplastin [Source:MGI Symbol;Acc:MGI:108077]		neuroplastin
ENSMUST00000021662.11	21.1662	-7.14584	141.616	1.68434	-4.2425	2.21039e-05	0.00149233	ENSMUSG00000021236	Entpd5	ectonucleoside triphosphate diphosphohydrolase 5 [Source:MGI Symbol;Acc:MGI:1321385]	R-MMU-1430728	ectonucleoside triphosphate diphosphohydrolase 5
ENSMUST00000179434.7	22.753	-7.24911	152.124	1.70083	-4.2621	2.02514e-05	0.00139655	ENSMUSG00000024292	Cyp4f14	cytochrome P450, family 4, subfamily f, polypeptide 14 [Source:MGI Symbol;Acc:MGI:1927669]	R-MMU-1430728	cytochrome P450, family 4, subfamily f, polypeptide 14
ENSMUST00000170716.7	23.405	-7.28719	156.193	1.85117	-3.93654	8.26646e-05	0.0038742	ENSMUSG00000060600	Eno3	enolase 3, beta muscle [Source:MGI Symbol;Acc:MGI:95395]	R-MMU-1430728	enolase 3, beta muscle
ENSMUST00000032748.14	24.534	-7.34833	162.956	1.08208	-6.79094	1.11409e-11	1.291e-08	ENSMUSG00000030533	Unc45a	unc-45 myosin chaperone A [Source:MGI Symbol;Acc:MGI:2142246]		unc-45 myosin chaperone A
ENSMUST00000017961.10	28.0123	-7.54621	186.911	1.85727	-4.06307	4.84307e-05	0.00266424	ENSMUSG00000017817	Jph2	junctophilin 2 [Source:MGI Symbol;Acc:MGI:1891496]		junctophilin 2
ENSMUST00000027579.16	58.2147	-8.60375	389.033	2.11238	-4.07301	4.64088e-05	0.00256764	ENSMUSG00000026341	Actr3	ARP3 actin-related protein 3 [Source:MGI Symbol;Acc:MGI:1921367]	R-MMU-1266738	ARP3 actin-related protein 3
ENSMUST00000115021.7	105.963	-8.90265	478.591	1.11974	-7.95062	1.85581e-15	1.19446e-11	ENSMUSG00000029761	Cald1	caldesmon 1 [Source:MGI Symbol;Acc:MGI:88250]	R-MMU-397014	caldesmon 1
ENSMUST00000101454.8	91.4515	-9.25468	610.851	1.84656	-5.01186	5.39078e-07	0.000111925	ENSMUSG00000031328	Flna	filamin, alpha [Source:MGI Symbol;Acc:MGI:95556]	R-MMU-109582	filamin, alpha
ENSMUST00000113705.7	941.915	-9.99681	1021.74	1.05706	-9.45715	3.16459e-21	3.05525e-17	ENSMUSG00000032366	Tpm1	tropomyosin 1, alpha [Source:MGI Symbol;Acc:MGI:98809]	R-MMU-390522	tropomyosin 1, alpha
ENSMUST00000210815.1	43.949	-21.7322	3.48372e+06	3.0267	-7.18016	6.96288e-13	1.22224e-09	ENSMUSG00000063229	Ldha	lactate dehydrogenase A [Source:MGI Symbol;Acc:MGI:96759]	R-MMU-1428517	lactate dehydrogenase A

## Sheet: TableS3
Table S3. Top diseases and functions affected by deregulated transcripts in inflamed colon tissue as determined by Ingenuity Pathway Analysis (IPA)
Molecules in Network	Score	Focus Molecules	Top Diseases and Functions
Alpha tubulin,ANXA8/ANXA8L1,APP,ARL4D,Beta Tubulin,C1orf115,CALML4,CDIPT,Dynein,EML1,EML4,FAM212B,Ferritin,ICK,IGF2BP2,Irp,KCNIP4,LIMS2,LRRC42,MAB21L2,MEIS2,MESD,MLX,OLFM1,Pcp4l1,Pi3k class III,Plpp1,SH3BGRL3,SLC40A1,SPEG,STARD10,TTLL7,TUBA1A,TUBB6,tubulin (family)	44	28	Cellular Compromise, Organismal Injury and Abnormalities, Skeletal and Muscular Disorders
Actin,ACTN1,Alpha Actinin,Alpha catenin,Ang4,ANXA2,ASB2,Cadherin,CPE,CTNNB1,CYP4F12,DACT3,DPT,DSP,ENO3,FLNA,HNRNPK,ITGB4,JUP,Keratin,KRT17,MARCKSL1,MLLT10,MYO1C,NKD1,NSD2,NUP93,OGN,PDLIM7,PLEC,Spectrin,SVIL,TCF/LEF,UNC45A,USP46	44	28	Cellular Assembly and Organization, Cellular Function and Maintenance, Cardiovascular System Development and Function
Angiotensin II receptor type 1,BAZ1A,CDK4/6,COMMD3-BMI1,DDIT4,Eif2,EIF2B2,FAM129B,FLNC,FNDC3A,FRMD6,GAS1,GRAMD1B,HDC,Hedgehog,HNRNPAB,HP1BP3,KIT,MAGED1,Mt2,p70 S6k,PARP,Pde4,PDLIM4,PTBP2,PTGS1,RBFOX2,RBPMS,RBPMS2,ROR2,SYNPO2,thyroid hormone receptor,TRIP11,Vegf,ZMPSTE24	39	26	Cancer, Hematological Disease, Immunological Disease
ATP5F1B,BAG1,BAG2,BRPF1,caspase,Ck2,Clathrin,DCUN1D1,DMTF1,DNAJ,Dynamin,estrogen receptor,Fgfr,FN1,GAK,HNRNPA2B1,Hsp70,Hsp90,HSPA8,INTS10,KANK2,MAP1B,MYH11,PAICS,PDZRN3,PIK3C3,PSIP1,Raf,RAF1,RPS2,SDC2,SH3GLB1,TAGLN,TJP3,YBX1	37	25	Cellular Movement, Cell Death and Survival, Developmental Disorder
CD3 group,DPP10,EGLN,EGLN3,elastase,ELF3,EPSTI1,ETS,glutathione peroxidase,GPC3,GPX2,Hif,Ho,HSPB6,KCND3,Ldh (complex),LDHA,NFkB (complex),NXN,PAM,PFKP,PI3K (family),QPCT,RNF19B,SEMA3C,SMARCD3,SNTG2,Sod,TCF,TMEM107,TRIM40,TRPM6,ULBP1,Wfdc17,ZBP1	33	23	Neurological Disease, Skeletal and Muscular Disorders, Increased Levels of LDH
Akt,CD81,CDON,CFL2,CLSTN1,Collagen type VI,DDOST,DES,Foxo,LAPTM4B,LRP,MIR200,MYADM,N-Cadherin,NEO1,Pak,PLAC8,PMP22,PPP1CB,Presenilin,PREX1,PTTG1IP,Ryr,Secretase gamma,SERINC3,SH2D4A,SLC16A1,SLC4A7,SLC6A17,SORBS2,ST5,SYNM,Vla-4,VLDL,WARS	33	23	Cellular Assembly and Organization, Cellular Function and Maintenance, Tissue Development
20s proteasome,26s Proteasome,BHLHE40,CLMP,CNOT7,Ctbp,Cyclin E,E2f,E2F4,EMC4,FBLN1,Foxp2,GNA14,GPRASP1,HLA-DR,IER3,IFN alpha/beta,IL11RA,IRF,ITGB5,LDLRAD3,MAP1LC3,MAPK8IP1,NDN,Pias,PIAS2,PKD1,PLSCR1,PSMB8,Smad2/3-Smad4,STAT3,thymidine kinase,TNS1,TWIST,ZFP36	31	22	Organ Morphology, Organismal Injury and Abnormalities, Renal and Urological Disease
2' 5' oas,ACOD1,adhesion molecule,ALDH,ALDH2,ALDH1A3,ANGPTL2,Bvr,Cald1,Ciap,Collagen type VII,CTNNA-CTNNB1-CTNNG-CDH5,DMBT1,EFHD2,ENTPD5,Fascin,FOXF1,FRMD4A,GUCY,IL1/IL6/TNF,IL17a dimer,Keratin II, 6,Lymphotoxin,MMRN1,MR1,NfkB-RelA,NfkB1-RelA,OLFML2B,peptidase,POPDC2,RCN3,SPARCL1,SYT11,TNF,TRIM15	25	19	Cancer, Cellular Development, Organismal Injury and Abnormalities
alcohol group acceptor phosphotransferase,BPGM,COL23A1,COL6A3,COL8A1,collagen,DDR1,DMPK,EHD2,ENAH,Erm,Gi-coupled receptor,Gm-csf,GRK6,growth factor,HOXA5,Hsp27,JINK1/2,KITLG,MAP2K3,Mapk,MAPK13,MKK3/6,NADPH oxidase,PALLD,Pdgf Ab,PICK1,Ppp2c,PTN,Rab11,Rho gdi,Rsk,SIX5,SUPT7L,TSH	23	18	Cancer, Organismal Injury and Abnormalities, Connective Tissue Disorders
Alp,BAZ2A,CASP7,CD3,CLMN,COL3A1,Creb,CRYAB,Cyclin A,Cyclin B,Cyclin D,DNA-methyltransferase,FAM83D,GABPB2,Gsk3,Hdac,HISTONE,HSPB1,HSPB2,HSPB8,LDL,LRP1,MAP2K1/2,NFAT (complex),Nnt,OAZ1,PDGF BB,PPIL2,PTGS2,Rb,SPARC,TAF1B,TSPAN9,Ubiquitin,Wnt	23	18	Hereditary Disorder, Organismal Injury and Abnormalities, Skeletal and Muscular Disorders
ASPN,CASC3,CAV1,CAVIN1,CYFIP1,EXOSC10,Focal adhesion kinase,FXYD6,Histone h3,Histone h4,IFI16,IKK (complex),Insulin,Lh,LMNA,MARVELD1,MED12,MED23,NSF,P110,P glycoprotein,P-TEFb,p85 (pik3r),Pdgfr,PRKAA,Ras homolog,RHOF,RHOT1,RNA polymerase II,Rnr,RTN4,SLC37A3,Smad2/3,TCR,Tmsb4x (includes others)	23	18	Connective Tissue Disorders, Hereditary Disorder, Metabolic Disease
ABI1,ACTG2,ACTR3,ADCY5,Alpha actin,Arp2/3,ARPC5,ARPC1B,ATP2A3,ATP2B1,ATP2B4,BTG2,Ca2 ATPase,Calcineurin A,CAMK2N1,Cofilin,ERK,F Actin,farnesyl transferase,G-Actin,HAND2,LMOD1,Myosin,Oas,Pde,Pln,Pmca,S100,SERCA,TMSB4,Tni,Tpm1,Tpm2,TPM3,Tropomyosin	21	17	Cell Signaling, Cellular Assembly and Organization, Post-Translational Modification
ALT,Ap1,Calm1 (includes others),CXCL3,CYP,cytokine,Ecm,ENPEP,Fibrinogen,GAPDH,GOT,GUCY1A1,IDH3A,IFN Beta,IgG,IKBKG,IL1,IL12 (family),Interferon alpha,ITGB1,LGALS1,Ngf,NOS2,Nr1h,RCN2,RHOG,Rxr,S100A8,S100A9,SOCS3,STAT5a/b,SYK,Tgf beta,Tnf (family),XPO7	21	17	Inflammatory Response, Cellular Movement, Hematological System Development and Function
Adaptor protein 1,c-Src,Caveolin,CD9,CIB1,Collagen Alpha1,Eotaxin,ERK1/2,FERMT2,Fibrin,Filamin,GIPC1,IGFBP2,IL-1R,Integrin,Integrin alpha 3 beta 1,Integrin alpha 4 beta 1,Integrin alpha 5 beta 1,Integrinα,Integrinβ,ITGA1,ITGA8,ITGA9,ITLN1,JAM2,KCNH2,NRTN,POSTN,Rab5,Rap,RGS5,TGFBR,TLR7/8,TSPAN,TSPAN3	18	15	Cell-To-Cell Signaling and Interaction, Tissue Development, Cellular Movement
Ampa Receptor,Atrial Natriuretic Peptide,Cdk,CNN1,GC-GCR dimer,Jnk,KALRN,MAP3K20,Mlc,Mlcp,MYL6,MYL9,MYLK,myosin-light-chain kinase,Na+,K+ -ATPase,NET1,Notch,NUDT14,Pdgf (complex),phosphatase,Pkg,PP1 protein complex group,PP1/PP2A,PPP1R12A,Ppp1r12b,PPP1R12C,PPP1R14A,Rock,SDC3,sphingomyelinase,Syndecan,Syntaxin,TH1 Cytokine,TNXB,TSPAN2	18	15	Skeletal and Muscular System Development and Function, Cell-To-Cell Signaling and Interaction, Cellular Assembly and Organization
Aconitase,Alpha 1 antitrypsin,C8,Casein,chymotrypsin,Collagen type I,Collagen type II,Collagen type III,Collagen type ix,Collagen type V,Collagen(s),DCN,DDAH1,EFEMP2,FBN1,Fgf,FURIN,GPIIB-IIIA,GUCA2A,HSPG2,IL1B,Inflammasome (Nalp3, Asc, Casp1),ITM2B,LUM,MAC,MIR124,MMP8,MMP10,MMP13,NCOA5,proprotein convertase,secreted MMP,sPla2,TNC,trypsin	18	15	Cardiovascular Disease, Cardiovascular System Development and Function, Organismal Injury and Abnormalities
14-3-3,CACNA2D1,Calcineurin protein(s),calpain,CAMK2D,CaMKII,CAST,Cdc2,cytochrome C,cytochrome-c oxidase,FSH,ITPR,ITPR1,KCTD5,MAP4,mGluR,Mitochondrial complex 1,MRVI1,MT-ND6,N-type Calcium Channel,NDUFA4,Nfat (family),NMDA Receptor,PDE3A,Pka,Pka catalytic subunit,PP2A,PRNP,PTP4A1,PTPase,RIMS1,SERINC1,SLC25A4,Smad1/5/8,tyrosine kinase	18	15	Cardiovascular Disease, Organismal Injury and Abnormalities, Neurological Disease
AMPK,AMY2B,amylase,APC/APC2,arginase,BET,BNIP3L,C/EBP,CAV3,CKB,CKM,creatine kinase,cyclooxygenase,Dishevelled,FSTL1,Growth hormone,HDL,HDL-cholesterol,Hif1,HMOX1,IL23,IL17D,IL1A,JPH2,KLHL23/PHOSPHO2-KLHL23,LDL-cholesterol,LITAF,MEF2,Nos,P38 MAPK,Pro-inflammatory Cytokine,SAA,Saa3,SNPH,TH2 Cytokine	16	14	Hereditary Disorder, Organismal Injury and Abnormalities, Skeletal and Muscular Disorders
ABCG5,ARAP2,Ca2+,CALY,CANT1,CDH5,CDH23,CPXM2,DLG4,DNAJB5,DNAJB6,ENPP1,ENTPD2,ENTPD4,ENTPD5,GNRH,HDAC4,HSPB6,ITFG1,KLHDC8B,L-triiodothyronine,MAMDC2,MYOM1,NBEA,Nptn,NPY,Npy4r,OTX2,phytanic acid,PPY,SARAF,SLC24A3,VGF,WIF1,WNT9B	16	14	Cell Morphology, Skeletal and Muscular System Development and Function, Cell Signaling
ADCY10,Cbp/p300,CCDC25,Ces2c,CYP2C19,CYP2D6,CYP3A7,CYP3A43,DEPP1,DMC1,EXT2,FAM103A1,FRK,GMDS,HNF4A,KDELC1,LAPTM4A,Ncoa-Nr1i2-Rxra,Nrbp2,ORMDL2,PCYT1A,Proinsulin,SCAND1,SLC39A6,SMG9,STAT,STK19,TMEM161A,TRIM23,TTC22,UGT1A6,UGT2A3,UGT2B11,UGT2B15,WDR13	14	13	Drug Metabolism, Small Molecule Biochemistry, Endocrine System Development and Function
Abi3bp,BAMBI,BTBD6,CHD4,CHEK2,CHODL,CRYBG1,CRYZ,CUL3,DDX4,FAM46B,FAM84B,hemoglobin,HMCN2,INHBA,LDHA,NSD3,NT5DC2,Olfr251/Olfr898,PAX4,PAX6,Pdlim3,PGM2L1,RPA1,SIN3B,SLC40A1,SLX4,SMARCA4,SRPX,TMEM252,TNNC2,TRNP1,TROVE2,ZNF711,ZNF827	14	13	Cell Death and Survival, Cellular Development, Cellular Growth and Proliferation
ACAP1,Acot1,ACSS1,ANO1,C6orf89,C9orf3,Cyp2c40 (includes others),Cyp2d22,FIBIN,HILPDA,MGA,MRGPRF,MT1X,N-cor,NCOR1,PDE9A,PLA2G3,PNPLA3,PPARA,RAB20,RCN3,RNF39,S100a11,SELENOM,SHISA5,SIRT1,SLC44A1,SMPDL3A,STAT4,STAT6,Trim30a/Trim30d,TWIST1,WNT3A,XBP1,ZNF236	14	13	Connective Tissue Development and Function, Cellular Assembly and Organization, Cellular Function and Maintenance
ACTA2,Adaptor protein,ASAP1,Caspase 3/7,Collagen type IV,Complement component 1,Cpla2,EXOC2,Fcer1,GAA,hexokinase,HK1,HK2,IL-2R,Integrin alpha V beta 3,JUN/JUNB/JUND,LAMC1,Laminin1,Laminin2,Laminin (complex),Laminin (family),LARGE1,LGALS4,Mek,MHC Class I (complex),PC-PLC,Pkc(s),RALB,Rap1,Rar,SLMAP,Smad,SMPD2,Sos,Vdac	13	12	Carbohydrate Metabolism, Cellular Compromise, Cellular Function and Maintenance
AASDHPPT,AK1,ALG1,ANAPC11,ANKRD49,Anp32e,AREL1,ASB2,BABAM1,C20orf194,CHTF8,CMIP,CUEDC2,DDX59,DIRAS2,ELAVL4,EWSR1,FAM104A,HP1BP3,HSP90AA1,MIB1,NANS,NKD2,NUTF2,NXF1,PEF1,PYGO2,RNF25,SEMA5A,SMTN,Tpm3,UBC,VPS36,WDR37,ZFAND2A	13	12	Cell-To-Cell Signaling and Interaction, Connective Tissue Disorders, Developmental Disorder
ABCB1,C1q,CCL3L3,CD38,Cxcl9,Gm15807/Hmgn5,HSP,I kappa b kinase,Ifn,Ifn gamma,IFN type 1,Iga,Ige,Igm,Iigp1,Ikb,Ikk (family),IL12 (complex),Immunoglobulin,IRF8,LCN2,Ly6a (includes others),mediator,MHC Class II (complex),NFkB (family),NLR,PI3K p85,RAS,Sapk,Serine Protease,SH3BGRL2,SLPI,Tlr,Tnf receptor,transglutaminase	11	11	Hematological System Development and Function, Tissue Morphology, Cellular Movement

## Sheet: TableS4
Table S4. Counts table describing the abundance of each taxa in all samples included in this study. Taxonomic profiling was conducted with Kraken2
ID	CA1S	CA2S	CA3S	CA4S	CA5S	CB1S	CB2S	CB3S	CB4S	CB5S	CC1S	CC2S	CC3S	CC4S	CC5S	CA1E	CA2E	CA3E	CA4E	CA5E	CB1E	CB2E	CB3E	CB4E	CB5E	CC1E	CC2E	CC3E	CC4E	CC5E	TA1S	TA2S	TA3S	TA4S	TA5S	TB1S	TB2S	TB3S	TB4S	TB5S	TC1S	TC2S	TC3S	TC4S	TC5S	TA1E	TA2E	TA3E	TA4E
d__Bacteria|p__Actinobacteria	48	44	15	109	14	66	76	42	48	35	39	52	50	41	25	20	28	18	20	17	28	17	20	29	45	43	19	44	31	20	22	16	30	20	25	17	30	43	10	16	46	16	11	3	14	28	18	22	19
d__Bacteria|p__Actinobacteria|c__Actinobacteria	74	62	20	201	19	97	48	45	87	50	16	65	69	50	40	12	23	28	12	18	50	28	39	19	26	43	28	50	29	24	34	62	68	92	42	24	36	69	74	30	77	37	10	14	14	36	58	34	26
d__Bacteria|p__Actinobacteria|c__Actinobacteria|o__Actinomycetales|f__Actinomycetaceae|g__Actinomyces|s__Actinomyces sp. oral taxon 414	14	30	5	87	2	106	16	23	29	19	15	35	43	14	41	0	3	16	0	9	18	11	4	5	17	19	10	30	23	14	5	19	10	31	1	20	9	15	26	12	20	8	1	1	7	2	2	1	3
d__Bacteria|p__Actinobacteria|c__Actinobacteria|o__Bifidobacteriales|f__Bifidobacteriaceae|g__Bifidobacterium|s__Bifidobacterium bifidum	28	16	4	53	12	124	16	32	39	12	28	53	26	20	17	0	2	13	3	10	14	1	23	14	15	18	20	57	19	18	8	3	24	32	6	3	33	32	20	17	7	8	4	3	14	11	48	16	8
d__Bacteria|p__Actinobacteria|c__Actinobacteria|o__Bifidobacteriales|f__Bifidobacteriaceae|g__Bifidobacterium|s__Bifidobacterium breve	23	5	5	102	3	50	21	22	30	24	40	33	19	11	15	12	17	14	5	8	27	8	32	27	22	46	18	40	23	29	8	22	103	43	10	11	18	82	32	23	18	33	8	10	16	14	85	23	25
d__Bacteria|p__Actinobacteria|c__Actinobacteria|o__Corynebacteriales|f__Corynebacteriaceae|g__Corynebacterium	85	53	30	154	13	106	36	59	70	33	41	70	54	42	38	2	4	32	11	15	22	12	9	5	24	51	42	74	61	20	22	46	83	49	45	16	17	55	48	19	69	17	2	5	10	23	72	56	21
d__Bacteria|p__Actinobacteria|c__Actinobacteria|o__Corynebacteriales|f__Corynebacteriaceae|g__Corynebacterium|s__Corynebacterium kroppenstedtii	2	0	0	1	0	1	0	0	104	25	4	1	0	0	165	0	5	0	0	0	0	0	1	0	0	0	0	0	0	0	0	20	0	0	335	0	2	1	1	1	0	18	0	0	0	0	0	3	0
d__Bacteria|p__Actinobacteria|c__Actinobacteria|o__Propionibacteriales|f__Propionibacteriaceae|g__Cutibacterium|s__Cutibacterium acnes	846	59	14	1486	313	109	162	27	2187	2214	1898	51	74	503	1542	3	1061	27	1297	891	61	2052	581	111	149	233	128	696	236	395	280	2055	363	336	8179	26	179	500	57	234	1074	1053	35	110	31	7	77	1015	277
d__Bacteria|p__Actinobacteria|c__Coriobacteriia	36	30	15	43	8	34	38	23	21	7	20	21	44	15	20	12	36	24	28	13	21	18	33	24	17	8	5	14	13	7	10	15	10	14	10	18	10	56	8	17	22	18	28	9	13	11	8	27	15
d__Bacteria|p__Actinobacteria|c__Coriobacteriia|o__Eggerthellales|f__Eggerthellaceae	34	28	18	51	10	35	48	31	11	19	17	21	39	14	15	26	33	33	39	15	21	33	55	62	30	16	2	25	15	15	27	15	22	20	19	19	25	40	15	25	29	36	24	12	20	3	8	36	18
d__Bacteria|p__Actinobacteria|c__Coriobacteriia|o__Eggerthellales|f__Eggerthellaceae|g__Adlercreutzia|s__Adlercreutzia equolifaciens	197	113	127	206	27	199	196	118	86	115	95	127	205	111	107	129	191	126	141	61	165	134	296	213	189	51	27	156	55	46	212	66	111	66	87	102	107	249	36	127	160	149	180	50	108	51	59	238	110
d__Bacteria|p__Actinobacteria|c__Coriobacteriia|o__Eggerthellales|f__Eggerthellaceae|g__Gordonibacter|s__Gordonibacter massiliensis	16	13	10	73	4	22	11	8	5	7	51	9	11	13	20	17	13	17	14	9	8	34	20	9	14	8	1	6	13	4	4	2	10	8	10	7	6	17	2	19	13	13	10	8	3	1	2	11	11
d__Bacteria|p__Actinobacteria|c__Nitriliruptoria|o__Euzebyales|f__Euzebyaceae|g__Euzebya|s__Euzebya sp. DY32-46	27	23	8	111	4	29	29	0	1	12	5	0	1	19	11	3	0	10	2	10	8	2	0	0	5	1	7	16	5	4	11	27	62	49	4	2	5	20	14	2	0	0	0	0	0	17	12	12	7
d__Bacteria|p__Bacteroidetes	932	1360	405	791	548	1026	1002	918	1008	341	788	973	789	573	278	60	46	204	95	169	199	261	87	76	314	611	401	709	1025	375	897	679	449	941	158	282	281	428	195	38	740	80	102	57	252	575	278	410	524
d__Bacteria|p__Bacteroidetes|c__Bacteroidia	471	828	369	180	592	186	723	619	381	129	220	135	330	200	119	57	55	105	93	145	52	147	72	53	68	104	32	72	57	55	613	534	143	596	68	255	411	334	66	39	287	63	61	16	183	358	56	275	350
d__Bacteria|p__Bacteroidetes|c__Bacteroidia|o__Bacteroidales	3275	4786	2470	1010	3277	1222	4454	3720	2179	1026	1317	657	1762	1229	743	550	443	719	963	979	428	1393	684	559	644	638	212	482	444	432	5014	4119	1227	4950	1081	1478	2200	1887	425	315	2055	726	738	242	1371	3637	713	2783	3661
d__Bacteria|p__Bacteroidetes|c__Bacteroidia|o__Bacteroidales|f__Bacteroidaceae|g__Bacteroides	211	307	219	109	257	118	476	382	199	110	115	73	170	131	87	54	48	64	79	70	42	97	50	45	55	68	22	54	49	50	606	511	138	641	187	170	295	175	46	24	191	70	64	19	153	459	98	369	585
d__Bacteria|p__Bacteroidetes|c__Bacteroidia|o__Bacteroidales|f__Bacteroidaceae|g__Bacteroides|s__Bacteroides caccae	11	10	5	1	4	2	16	8	11	2	0	0	0	2	2	0	0	0	1	1	2	7	6	5	2	0	0	0	0	3	89	69	49	99	72	0	0	0	0	1	8	7	1	0	4	77	16	64	68
d__Bacteria|p__Bacteroidetes|c__Bacteroidia|o__Bacteroidales|f__Bacteroidaceae|g__Bacteroides|s__Bacteroides caecimuris	1464	5086	3243	1132	4841	4514	24327	22334	10375	3342	1986	1120	1063	2449	1444	507	1396	1131	2647	1022	2160	3501	4297	2985	1885	1370	1104	1377	2012	2663	4445	2194	729	3085	1512	2755	15794	2639	1252	179	10534	2770	2001	1459	12209	2474	877	3032	3889
d__Bacteria|p__Bacteroidetes|c__Bacteroidia|o__Bacteroidales|f__Bacteroidaceae|g__Bacteroides|s__Bacteroides cellulosilyticus	296	358	222	47	256	51	245	181	96	46	76	30	104	54	24	64	26	55	49	71	30	93	49	37	53	23	8	22	14	18	688	556	175	755	247	83	129	84	20	13	87	22	28	3	58	474	76	341	597
d__Bacteria|p__Bacteroidetes|c__Bacteroidia|o__Bacteroidales|f__Bacteroidaceae|g__Bacteroides|s__Bacteroides coprosuis	73	85	187	9	48	1	0	0	0	0	0	0	1	0	0	7	1	8	10	12	7	33	3	9	16	0	1	0	0	0	87	47	17	101	17	0	1	1	0	0	1	0	0	0	0	71	12	32	109
d__Bacteria|p__Bacteroidetes|c__Bacteroidia|o__Bacteroidales|f__Bacteroidaceae|g__Bacteroides|s__Bacteroides dorei	102	100	19	14	70	16	120	63	43	23	31	9	32	8	4	6	2	2	5	1	5	15	16	10	11	1	3	6	6	4	105	92	55	88	275	3	2	20	3	2	32	16	8	6	10	34	15	71	58
d__Bacteria|p__Bacteroidetes|c__Bacteroidia|o__Bacteroidales|f__Bacteroidaceae|g__Bacteroides|s__Bacteroides fragilis	1467	1890	962	481	1272	549	1968	1631	732	448	691	373	1012	726	274	290	212	412	539	550	196	522	236	191	307	306	78	211	221	175	1473	1690	364	1609	275	709	871	1094	207	149	781	386	455	94	578	1067	237	863	980
d__Bacteria|p__Bacteroidetes|c__Bacteroidia|o__Bacteroidales|f__Bacteroidaceae|g__Bacteroides|s__Bacteroides helcogenes	965	1029	425	343	835	376	1030	832	503	284	375	203	638	408	206	184	106	227	243	313	103	319	138	88	169	206	51	124	111	108	672	837	194	681	87	422	415	544	146	114	493	234	235	31	315	401	74	380	345
d__Bacteria|p__Bacteroidetes|c__Bacteroidia|o__Bacteroidales|f__Bacteroidaceae|g__Bacteroides|s__Bacteroides ovatus	16	17	1	7	20	4	441	19	13	8	11	3	4	2	0	4	1	0	3	1	1	3	5	1	2	0	1	1	0	1	10	9	1	6	8	1	1	7	1	1	13	3	3	0	2	3	1	6	1
d__Bacteria|p__Bacteroidetes|c__Bacteroidia|o__Bacteroidales|f__Bacteroidaceae|g__Bacteroides|s__Bacteroides salanitronis	323	504	170	153	311	206	540	545	243	108	154	149	241	158	100	29	22	67	80	87	44	108	61	46	61	99	41	101	71	44	729	662	301	840	203	175	296	279	59	20	278	71	58	23	152	528	151	468	530
d__Bacteria|p__Bacteroidetes|c__Bacteroidia|o__Bacteroidales|f__Bacteroidaceae|g__Bacteroides|s__Bacteroides vulgatus	59	39	11	10	37	25	860	82	48	21	16	4	13	16	10	9	10	13	26	9	16	27	39	33	26	5	5	8	10	13	183	182	97	235	311	21	121	32	10	5	62	51	29	17	82	156	62	238	329
d__Bacteria|p__Bacteroidetes|c__Bacteroidia|o__Bacteroidales|f__Barnesiellaceae|g__Barnesiella|s__Barnesiella viscericola	3218	4472	2571	1101	3167	1315	4413	3932	2064	1015	1437	726	2176	1427	779	561	413	773	838	1126	420	1181	433	329	594	756	215	431	446	397	3745	3679	871	4070	420	1616	2011	2067	456	282	1849	639	725	163	1239	2751	370	1564	2158
d__Bacteria|p__Bacteroidetes|c__Bacteroidia|o__Bacteroidales|f__Dysgonamonadaceae|g__Proteiniphilum|s__Proteiniphilum saccharofermentans	421	534	336	144	441	160	571	428	285	128	195	83	257	187	94	92	58	109	123	146	49	143	50	66	79	110	34	65	57	62	605	581	146	604	70	183	196	270	63	57	224	103	152	24	152	407	86	337	461
d__Bacteria|p__Bacteroidetes|c__Bacteroidia|o__Bacteroidales|f__Muribaculaceae|g__Muribaculum|s__Muribaculum intestinale	21589	28956	17906	6381	23113	8976	43218	37713	19082	9454	9722	3806	11934	8936	4137	4915	3885	5365	8028	7318	3826	10267	6876	5429	5185	4337	1573	2587	3053	4079	77103	69226	40662	63203	131029	9702	16116	13236	3068	2365	18505	7346	6682	2157	13043	66984	24191	96813	130372
d__Bacteria|p__Bacteroidetes|c__Bacteroidia|o__Bacteroidales|f__Odoribacteraceae|g__Odoribacter|s__Odoribacter splanchnicus	18	38	13	8	25	19	83	85	33	14	5	1	5	7	2	4	3	3	14	10	9	21	17	2	13	8	2	5	6	9	43	27	9	37	10	10	4	4	1	0	56	14	12	3	16	18	2	26	16
d__Bacteria|p__Bacteroidetes|c__Bacteroidia|o__Bacteroidales|f__Paludibacteraceae|g__Paludibacter|s__Paludibacter propionicigenes	121	158	140	30	89	36	139	91	67	38	36	15	60	48	40	23	28	35	53	59	22	69	26	15	26	19	13	10	17	18	106	132	21	151	10	83	83	64	18	27	67	16	49	9	49	162	22	69	106
d__Bacteria|p__Bacteroidetes|c__Bacteroidia|o__Bacteroidales|f__Porphyromonadaceae|g__Fermentimonas|s__Fermentimonas caenicola	31	49	37	13	21	4	7	16	1	0	2	1	3	1	2	9	2	2	9	10	3	18	6	5	4	0	1	3	0	0	187	157	28	235	20	2	2	3	1	0	2	0	2	0	0	155	22	98	239
d__Bacteria|p__Bacteroidetes|c__Bacteroidia|o__Bacteroidales|f__Porphyromonadaceae|g__Porphyromonas|s__Porphyromonas crevioricanis	24	38	26	8	24	9	27	22	6	7	4	2	6	7	7	2	1	4	7	5	5	10	2	3	4	4	2	1	4	3	43	34	9	34	5	6	25	11	3	2	13	2	3	0	6	31	6	18	30
d__Bacteria|p__Bacteroidetes|c__Bacteroidia|o__Bacteroidales|f__Porphyromonadaceae|g__Porphyromonas|s__Porphyromonas gingivalis	35	56	37	11	25	11	41	29	38	19	15	12	25	15	14	5	2	11	14	12	13	15	9	5	7	7	2	6	8	5	42	42	12	54	10	21	41	21	3	3	13	3	9	0	15	22	5	27	47
d__Bacteria|p__Bacteroidetes|c__Bacteroidia|o__Bacteroidales|f__Prevotellaceae|g__Prevotella	53	110	28	18	91	24	128	92	61	33	34	16	52	26	13	18	5	18	30	9	12	24	25	23	14	10	2	7	8	17	564	406	169	672	102	39	60	43	10	10	56	34	14	5	35	449	63	306	457
d__Bacteria|p__Bacteroidetes|c__Bacteroidia|o__Bacteroidales|f__Prevotellaceae|g__Prevotella|s__Prevotella dentalis	34	43	5	10	25	9	49	30	25	10	15	2	28	7	5	1	2	5	1	3	2	6	13	4	7	2	1	2	7	7	33	18	6	16	9	10	11	10	1	2	21	8	4	6	8	20	2	20	20
d__Bacteria|p__Bacteroidetes|c__Bacteroidia|o__Bacteroidales|f__Prevotellaceae|g__Prevotella|s__Prevotella denticola	56	152	150	23	111	35	164	136	44	9	36	17	29	47	34	6	8	15	12	35	21	31	7	8	9	22	10	11	14	11	138	62	3	92	4	134	268	45	17	1	51	9	8	7	85	124	10	52	95
d__Bacteria|p__Bacteroidetes|c__Bacteroidia|o__Bacteroidales|f__Prevotellaceae|g__Prevotella|s__Prevotella enoeca	65	86	45	24	55	27	33	34	21	10	15	17	19	16	8	18	10	13	21	4	3	18	18	17	20	6	5	18	4	2	76	46	18	68	21	10	9	20	13	3	28	2	4	1	2	52	14	37	34
d__Bacteria|p__Bacteroidetes|c__Bacteroidia|o__Bacteroidales|f__Prevotellaceae|g__Prevotella|s__Prevotella fusca	132	378	212	72	242	81	375	401	124	43	93	63	89	108	96	16	16	48	72	88	36	93	26	18	42	47	21	30	44	22	295	134	21	205	10	198	449	118	42	8	139	41	44	9	209	194	26	91	168
d__Bacteria|p__Bacteroidetes|c__Bacteroidia|o__Bacteroidales|f__Prevotellaceae|g__Prevotella|s__Prevotella ruminicola	15	27	29	12	27	5	31	28	24	3	13	5	12	12	2	4	4	3	8	6	4	13	6	4	2	5	0	1	2	1	29	16	1	22	7	4	7	21	2	3	12	4	7	2	9	16	1	13	12
d__Bacteria|p__Bacteroidetes|c__Bacteroidia|o__Bacteroidales|f__Prevotellaceae|g__Prevotella|s__Prevotella scopos	187	233	285	23	101	1	1	0	1	0	0	0	1	0	0	27	12	17	29	28	18	37	22	13	31	0	1	6	0	0	190	117	14	196	18	1	2	0	0	0	1	0	0	0	0	134	9	40	127
d__Bacteria|p__Bacteroidetes|c__Bacteroidia|o__Bacteroidales|f__Prevotellaceae|g__Prevotella|s__Prevotella sp. oral taxon 299	328	505	276	147	303	138	511	469	202	105	159	85	260	172	50	70	39	83	88	137	39	125	41	43	50	67	20	48	62	52	550	406	98	544	51	197	228	242	41	44	255	87	86	21	125	363	46	197	392
d__Bacteria|p__Bacteroidetes|c__Bacteroidia|o__Bacteroidales|f__Rikenellaceae|g__Alistipes	139	224	118	55	206	83	334	326	141	92	114	39	96	104	53	55	53	49	87	66	47	78	79	81	37	45	15	34	46	44	165	150	31	112	45	121	371	209	44	37	177	90	72	35	178	107	29	88	85
d__Bacteria|p__Bacteroidetes|c__Bacteroidia|o__Bacteroidales|f__Rikenellaceae|g__Alistipes|s__Alistipes finegoldii	35	63	39	15	58	16	114	72	65	20	15	6	31	15	4	9	7	7	11	8	4	22	31	16	7	5	6	6	7	8	193	79	46	134	392	16	23	29	4	6	42	21	21	13	14	36	31	64	55
d__Bacteria|p__Bacteroidetes|c__Bacteroidia|o__Bacteroidales|f__Rikenellaceae|g__Alistipes|s__Alistipes shahii	42	56	22	14	32	10	31	27	27	6	12	14	27	5	2	4	2	9	15	5	1	11	3	4	3	3	1	2	6	2	64	59	24	62	50	5	2	14	2	2	19	5	3	1	3	41	13	76	47
d__Bacteria|p__Bacteroidetes|c__Bacteroidia|o__Bacteroidales|f__Rikenellaceae|g__Mucinivorans|s__Mucinivorans hirudinis	62	84	30	8	42	12	46	27	35	4	11	3	15	10	6	3	1	4	7	11	9	9	6	5	3	1	5	4	4	1	42	42	9	53	4	14	27	17	5	2	11	1	0	0	15	57	19	22	27
d__Bacteria|p__Bacteroidetes|c__Bacteroidia|o__Bacteroidales|f__Tannerellaceae	23	66	23	8	29	16	27	21	18	5	12	6	21	6	7	6	2	5	10	11	0	15	1	3	0	8	3	2	2	2	115	72	34	119	19	16	22	11	7	6	15	5	5	3	9	63	7	48	106
d__Bacteria|p__Bacteroidetes|c__Bacteroidia|o__Bacteroidales|f__Tannerellaceae|g__Parabacteroides	1728	2394	1433	572	1817	607	2044	1907	927	495	755	351	941	795	328	288	173	352	459	562	190	593	178	154	280	358	96	170	182	193	1824	2017	494	2031	217	763	816	970	235	163	822	304	349	70	528	1260	185	845	1114
d__Bacteria|p__Bacteroidetes|c__Bacteroidia|o__Bacteroidales|f__Tannerellaceae|g__Parabacteroides|s__Parabacteroides distasonis	172	202	91	53	157	81	236	199	104	67	76	33	124	79	40	36	22	41	48	82	34	90	24	23	29	24	7	20	22	29	153	173	34	143	20	105	113	109	19	17	121	35	54	16	62	104	22	99	94
d__Bacteria|p__Bacteroidetes|c__Bacteroidia|o__Bacteroidales|f__Tannerellaceae|g__Parabacteroides|s__Parabacteroides sp. CT06	1461	2058	1371	420	1453	448	1828	1475	781	403	639	248	812	536	291	269	189	359	508	513	189	537	206	183	265	300	102	207	161	178	1403	1413	347	1413	341	680	711	886	191	142	743	278	392	64	503	1098	222	859	1108
d__Bacteria|p__Bacteroidetes|c__Bacteroidia|o__Bacteroidales|f__Tannerellaceae|g__Tannerella|s__Tannerella sp. oral taxon HOT-286	24	38	13	9	33	5	21	10	18	2	7	8	2	9	2	0	3	6	6	4	2	11	4	4	4	2	0	1	1	4	18	8	2	9	2	15	25	7	2	1	12	3	0	1	8	8	4	11	20
d__Bacteria|p__Bacteroidetes|c__Bacteroidia|o__Bacteroidales|g__Candidatus Azobacteroides|s__Candidatus Azobacteroides pseudotrichonymphae	154	271	215	77	193	109	341	340	117	48	71	42	100	90	59	23	34	32	51	65	34	94	40	50	42	39	20	42	48	28	245	144	30	216	25	158	307	131	40	15	146	49	37	23	154	160	23	81	112
d__Bacteria|p__Bacteroidetes|c__Cytophagia|o__Cytophagales|f__Cyclobacteriaceae|g__Aquiflexum|s__Aquiflexum balticum	82	112	87	13	62	6	34	46	17	6	9	5	20	12	3	8	5	7	11	13	11	34	5	4	12	3	3	2	3	6	101	48	12	90	6	7	11	29	2	5	19	3	5	2	6	43	6	24	63
d__Bacteria|p__Bacteroidetes|c__Cytophagia|o__Cytophagales|f__Cytophagaceae|g__Cytophaga|s__Cytophaga hutchinsonii	22	37	8	11	31	16	36	39	12	5	15	5	23	7	9	1	2	5	5	4	1	14	3	0	6	4	2	8	6	2	30	27	4	21	3	3	8	16	3	5	15	9	4	3	8	12	0	5	10
d__Bacteria|p__Bacteroidetes|c__Cytophagia|o__Cytophagales|f__Cytophagaceae|g__Pseudarcicella|s__Pseudarcicella sp. HME7025	46	57	51	15	18	2	1	0	1	1	0	4	1	0	1	13	3	4	6	11	7	18	6	5	8	1	0	3	1	0	62	46	8	58	7	0	2	0	0	0	1	0	0	0	0	59	4	10	34
d__Bacteria|p__Bacteroidetes|c__Flavobacteriia|o__Flavobacteriales	49	52	29	28	23	16	11	16	12	7	12	18	18	12	4	3	2	5	2	7	1	15	11	11	6	6	7	10	9	3	41	26	19	54	14	7	9	11	1	0	11	1	1	1	3	25	16	20	21
d__Bacteria|p__Bacteroidetes|c__Flavobacteriia|o__Flavobacteriales|f__Flavobacteriaceae	25	16	12	51	17	32	21	28	18	8	8	20	16	13	11	1	2	5	0	5	5	6	2	0	5	9	6	18	6	9	17	14	9	21	4	11	27	15	12	4	19	4	5	3	8	21	5	10	14
d__Bacteria|p__Bacteroidetes|c__Flavobacteriia|o__Flavobacteriales|f__Flavobacteriaceae|g__Muricauda|s__Muricauda lutaonensis	203	263	157	58	133	59	213	173	117	61	81	34	116	67	50	38	17	48	42	72	26	79	28	15	32	37	11	22	14	34	174	161	44	168	22	98	93	87	20	17	97	29	45	5	60	175	17	97	140
d__Bacteria|p__Bacteroidetes|c__Sphingobacteriia|o__Sphingobacteriales|f__Sphingobacteriaceae|g__Sphingobacterium|s__Sphingobacterium sp. 21	121	134	56	35	83	33	144	107	50	32	45	23	66	40	27	24	12	23	39	48	21	47	14	12	21	20	3	6	9	17	191	189	42	186	20	71	77	45	7	12	57	13	28	6	44	137	18	72	124
d__Bacteria|p__Chrysiogenetes|c__Chrysiogenetes|o__Chrysiogenales|f__Chrysiogenaceae|g__Desulfurispirillum|s__Desulfurispirillum indicum	43	35	5	51	16	65	41	51	72	14	65	74	36	42	12	2	1	6	0	10	9	11	1	5	14	31	29	40	57	18	16	25	30	30	2	8	1	8	5	0	53	1	4	2	5	6	6	8	1
d__Bacteria|p__Cyanobacteria	148	114	17	321	40	285	118	171	212	82	223	258	131	98	117	15	5	30	4	26	48	28	23	2	78	142	103	195	267	96	72	79	116	132	14	51	39	81	93	19	198	22	11	9	23	60	81	50	25
d__Bacteria|p__Cyanobacteria|o__Synechococcales|f__Synechococcaceae|g__Synechococcus	15	13	2	99	0	58	6	15	11	13	7	18	20	11	23	1	1	6	0	10	16	0	4	0	15	8	8	25	10	4	1	18	9	37	2	21	5	9	37	1	17	8	0	2	1	6	13	5	7
d__Bacteria|p__Fibrobacteres|c__Fibrobacteria|o__Fibrobacterales|f__Fibrobacteraceae|g__Fibrobacter|s__Fibrobacter succinogenes	18	17	5	24	4	21	19	6	13	9	6	8	9	7	9	1	3	4	1	5	0	2	0	2	8	14	4	22	7	3	5	15	12	26	4	5	21	40	4	0	8	4	0	0	3	24	31	19	9
d__Bacteria|p__Firmicutes	3590	2894	797	8524	754	8563	3430	3207	5914	2516	4384	7092	3701	3064	2623	394	432	1455	215	1161	2349	776	823	658	2760	4954	3734	6520	7803	3236	1217	2190	3431	3535	375	1251	1040	2914	2550	1263	4029	930	577	652	988	1629	2665	1596	960
d__Bacteria|p__Firmicutes|c__Bacilli	106	257	37	216	124	176	261	176	171	60	131	128	71	86	45	13	34	68	10	33	38	19	18	13	34	73	53	103	109	32	88	94	160	315	26	78	108	250	79	15	426	35	38	42	24	146	85	150	45
d__Bacteria|p__Firmicutes|c__Bacilli|o__Bacillales	287	422	126	255	169	171	283	125	237	171	126	137	183	75	58	24	17	57	19	41	64	61	18	18	67	89	52	123	81	30	279	143	114	378	38	71	66	170	79	12	190	25	23	25	39	154	103	117	131
d__Bacteria|p__Firmicutes|c__Bacilli|o__Bacillales|f__Bacillaceae	3	9	2	11	2	14	93	4	33	6	6	16	8	15	4	0	0	3	1	2	3	1	0	4	2	10	3	12	9	6	4	17	17	35	1	21	16	26	9	0	32	6	7	4	12	9	14	10	10
d__Bacteria|p__Firmicutes|c__Bacilli|o__Bacillales|f__Bacillaceae|g__Bacillus	116	152	64	142	32	200	149	128	111	50	94	137	92	67	71	2	7	25	6	28	51	14	9	7	52	95	41	108	87	26	68	83	107	138	21	49	40	52	35	4	110	14	7	12	24	69	34	24	26
d__Bacteria|p__Firmicutes|c__Bacilli|o__Bacillales|f__Bacillaceae|g__Bacillus|s__Bacillus anthracis	14	24	12	38	13	52	44	25	21	18	29	23	25	21	14	3	1	11	0	10	10	6	4	0	13	21	21	38	40	9	14	15	26	23	1	6	22	36	19	3	34	0	6	4	8	35	16	19	6
d__Bacteria|p__Firmicutes|c__Bacilli|o__Bacillales|f__Bacillaceae|g__Bacillus|s__Bacillus cereus	72	92	22	146	41	132	84	85	56	33	56	84	73	57	55	2	4	13	4	21	28	12	5	6	38	62	25	80	75	21	38	48	73	95	15	52	35	69	50	3	64	9	1	3	14	48	35	33	14
d__Bacteria|p__Firmicutes|c__Bacilli|o__Bacillales|f__Bacillaceae|g__Bacillus|s__Bacillus thuringiensis	75	78	33	201	28	162	86	138	160	55	98	184	107	46	74	5	5	29	0	39	58	14	18	15	61	100	58	146	127	45	31	67	90	120	1	42	45	68	72	12	129	14	3	7	24	73	38	56	26
d__Bacteria|p__Firmicutes|c__Bacilli|o__Bacillales|f__Bacillaceae|g__Bacillus|s__Bacillus velezensis	13	20	10	56	7	43	30	35	35	7	21	32	17	25	19	3	0	8	0	12	16	8	5	0	20	33	22	38	46	21	10	8	25	26	3	12	12	22	17	3	28	3	3	3	7	21	22	17	11
d__Bacteria|p__Firmicutes|c__Bacilli|o__Bacillales|f__Paenibacillaceae|g__Paenibacillus	75	58	26	299	14	66	30	61	77	29	41	77	48	27	21	0	2	34	4	18	18	3	4	2	27	50	35	81	35	16	30	84	124	152	3	65	16	114	119	15	77	16	5	9	17	60	149	44	28
d__Bacteria|p__Firmicutes|c__Bacilli|o__Bacillales|f__Paenibacillaceae|g__Paenibacillus|s__Paenibacillus larvae	41	77	49	105	27	52	22	28	15	8	21	30	25	2	24	1	4	15	4	19	23	7	0	0	8	27	7	38	23	5	2	2	58	7	2	2	6	2	2	0	3	0	0	0	0	27	34	18	5
d__Bacteria|p__Firmicutes|c__Bacilli|o__Bacillales|f__Paenibacillaceae|g__Paenibacillus|s__Paenibacillus mucilaginosus	61	82	15	16	44	18	77	37	54	13	37	12	38	16	2	5	1	4	9	5	2	16	3	2	8	5	2	3	7	3	39	31	6	38	8	12	6	33	2	8	22	10	4	2	7	11	2	9	18
d__Bacteria|p__Firmicutes|c__Bacilli|o__Bacillales|f__Paenibacillaceae|g__Paenibacillus|s__Paenibacillus polymyxa	27	13	3	15	2	23	11	36	14	8	7	35	18	8	16	2	0	2	0	2	14	3	3	1	13	17	21	45	20	10	4	8	24	15	2	6	18	35	18	1	33	1	4	6	1	63	114	35	13
d__Bacteria|p__Firmicutes|c__Bacilli|o__Bacillales|f__Paenibacillaceae|g__Paenibacillus|s__Paenibacillus sp. 32O-W	60	62	24	179	8	8	2	3	4	2	3	5	6	3	4	3	2	30	0	24	2	0	2	0	5	8	1	6	5	2	27	55	123	146	6	1	5	2	0	2	2	1	0	1	0	75	58	55	40
d__Bacteria|p__Firmicutes|c__Bacilli|o__Bacillales|f__Paenibacillaceae|g__Paenibacillus|s__Paenibacillus sp. FSL R7-0273	362	288	137	542	70	722	378	372	559	150	519	629	415	443	180	17	11	130	11	88	127	52	14	22	236	434	253	483	764	273	220	291	321	375	4	104	14	67	200	6	485	20	33	28	160	168	150	111	64
d__Bacteria|p__Firmicutes|c__Bacilli|o__Bacillales|f__Staphylococcaceae	3	73	1	2	4	1	10	1	3	0	2	20	15	16	2	0	1	0	0	1	0	0	0	0	0	0	0	1	0	0	127	13	1	225	13	52	2	70	10	15	158	5	18	43	21	2	1	0	5
d__Bacteria|p__Firmicutes|c__Bacilli|o__Bacillales|f__Staphylococcaceae|g__Staphylococcus	778	1119	106	368	16	600	379	278	10	4	23	140	105	84	31	2	11	3	1	4	7	1	3	0	2	9	4	7	4	1	665	51	13	1488	67	119	19	264	66	20	657	60	93	124	118	6	7	8	6
d__Bacteria|p__Firmicutes|c__Bacilli|o__Bacillales|f__Staphylococcaceae|g__Staphylococcus|s__Staphylococcus aureus	607	618	87	480	36	623	333	400	668	38	67	552	252	238	123	4	23	24	4	28	42	11	10	10	68	77	45	203	95	48	102	54	138	428	10	87	115	271	86	11	222	16	20	52	45	61	62	52	44
d__Bacteria|p__Firmicutes|c__Bacilli|o__Bacillales|f__Staphylococcaceae|g__Staphylococcus|s__Staphylococcus epidermidis	45	66	23	330	9	193	25	46	84	44	77	126	99	45	83	4	373	33	8	17	38	24	13	6	39	91	38	141	62	37	126	114	74	291	173	108	24	70	72	32	180	64	18	47	17	25	60	35	17
d__Bacteria|p__Firmicutes|c__Bacilli|o__Bacillales|f__Staphylococcaceae|g__Staphylococcus|s__Staphylococcus haemolyticus	10	106	6	6	5	0	1	0	0	0	5	24	49	18	8	0	1	0	0	0	0	5	1	0	0	0	0	0	0	0	534	68	2	856	33	282	7	189	22	50	401	15	16	119	26	1	0	2	3
d__Bacteria|p__Firmicutes|c__Bacilli|o__Bacillales|f__Staphylococcaceae|g__Staphylococcus|s__Staphylococcus hominis	1	11	1	0	1	1	1	0	3	9	4	5	7	5	7	1	1	0	0	10	0	28	0	2	1	0	0	0	1	2	45	403	1	63	28	31	1	24	0	7	41	2	2	18	4	0	0	0	2
d__Bacteria|p__Firmicutes|c__Bacilli|o__Bacillales|f__Staphylococcaceae|g__Staphylococcus|s__Staphylococcus nepalensis	773	3826	106	103	52	1	2	0	2	0	141	1710	1007	869	250	4	22	31	0	3	0	1	0	0	0	0	1	2	3	2	6599	137	101	15203	1394	105	165	3634	509	223	4740	1025	2637	3093	1381	0	3	2	8
d__Bacteria|p__Firmicutes|c__Bacilli|o__Bacillales|f__Staphylococcaceae|g__Staphylococcus|s__Staphylococcus xylosus	34	6	27	3	16	24	9	49	1	3	19	21	13	6	12	39	99	52	15	12	8	13	50	5	9	9	7	7	20	10	50	3	0	23	9	9	14	80	35	19	30	10	74	23	15	1	3	5	12
d__Bacteria|p__Firmicutes|c__Bacilli|o__Bacillales|f__Thermoactinomycetaceae|g__Novibacillus|s__Novibacillus thermophilus	11	28	8	34	1	29	48	41	27	8	10	13	13	13	8	0	0	11	2	4	11	6	6	6	9	11	2	19	20	2	12	47	27	91	3	35	48	94	19	5	84	11	12	6	23	101	68	44	23
d__Bacteria|p__Firmicutes|c__Bacilli|o__Lactobacillales	194	379	71	163	216	276	426	248	255	124	215	216	172	88	94	48	67	108	34	118	109	73	105	94	79	186	104	238	166	108	249	134	166	387	71	171	187	590	228	326	649	185	78	96	69	284	186	232	100
d__Bacteria|p__Firmicutes|c__Bacilli|o__Lactobacillales|f__Enterococcaceae|g__Enterococcus|s__Enterococcus faecalis	207	507	137	914	26	436	119	161	744	264	855	535	324	147	182	84	205	235	90	57	539	64	251	1833	432	359	177	406	207	299	1625	132	417	150	116	44	170	283	1953	83	3605	633	159	2701	45	201	289	410	866
d__Bacteria|p__Firmicutes|c__Bacilli|o__Lactobacillales|f__Lactobacillaceae	14	43	6	25	25	11	11	27	8	2	25	12	9	4	9	2	5	17	0	0	2	1	4	3	4	20	9	16	19	4	5	11	21	17	2	10	12	26	8	9	61	10	5	6	1	20	12	29	3
d__Bacteria|p__Firmicutes|c__Bacilli|o__Lactobacillales|f__Lactobacillaceae|g__Lactobacillus	40	4288	700	197	5635	33	719	4438	87	103	2641	362	176	141	243	109	975	1625	167	680	15	8	219	557	11	1309	534	1113	1222	595	96	1202	762	247	520	1939	2412	3716	236	187	8523	927	1298	686	317	6149	680	4200	157
d__Bacteria|p__Firmicutes|c__Bacilli|o__Lactobacillales|f__Lactobacillaceae|g__Lactobacillus|s__Lactobacillus acidophilus	7	473	17	40	677	16	35	330	14	12	291	25	19	14	22	18	276	211	32	87	6	3	41	121	9	117	63	114	79	73	6	105	55	19	53	139	180	343	19	38	609	123	152	66	21	819	86	418	11
d__Bacteria|p__Firmicutes|c__Bacilli|o__Lactobacillales|f__Lactobacillaceae|g__Lactobacillus|s__Lactobacillus delbrueckii	4	92	16	11	82	9	20	85	3	1	45	22	6	6	15	2	9	34	5	14	1	2	7	7	3	44	20	48	48	11	3	18	16	7	4	31	45	60	10	4	144	13	20	9	7	151	24	73	3
d__Bacteria|p__Firmicutes|c__Bacilli|o__Lactobacillales|f__Lactobacillaceae|g__Lactobacillus|s__Lactobacillus gasseri	0	113	8	3	146	0	11	84	4	2	55	7	2	3	3	9	72	54	7	14	1	0	11	35	0	17	16	8	20	24	1	20	16	3	21	32	52	87	4	11	171	34	42	21	9	151	11	93	1
d__Bacteria|p__Firmicutes|c__Bacilli|o__Lactobacillales|f__Lactobacillaceae|g__Lactobacillus|s__Lactobacillus helveticus	2	33	4	1	70	0	4	41	1	0	30	2	1	3	0	0	19	19	2	10	0	0	1	13	0	7	7	7	7	9	0	11	3	2	11	18	9	30	2	2	48	17	12	6	1	55	2	32	1
d__Bacteria|p__Firmicutes|c__Bacilli|o__Lactobacillales|f__Lactobacillaceae|g__Lactobacillus|s__Lactobacillus johnsonii	66	75352	3578	2106	123948	33	4681	63361	565	792	55987	2635	1512	2155	2357	4149	60147	37522	7423	13467	36	48	8691	26769	81	19089	8856	11820	13731	14592	670	20058	9675	2231	15160	21580	35618	71266	2404	6866	128552	27028	37726	21538	3695	122489	11975	85929	1139
d__Bacteria|p__Firmicutes|c__Bacilli|o__Lactobacillales|f__Lactobacillaceae|g__Lactobacillus|s__Lactobacillus kunkeei	15	26	13	80	4	26	115	6	42	8	9	18	14	15	28	4	1	15	1	13	17	1	7	5	17	10	0	31	22	10	16	25	5	74	1	35	9	17	22	6	19	9	2	7	3	29	10	12	8
d__Bacteria|p__Firmicutes|c__Bacilli|o__Lactobacillales|f__Lactobacillaceae|g__Lactobacillus|s__Lactobacillus sakei	26	12	5	66	16	41	26	66	103	12	17	93	47	15	19	2	4	9	2	7	8	3	6	6	10	21	16	37	36	6	7	19	12	24	0	13	15	19	23	0	24	4	5	3	2	23	18	12	4
d__Bacteria|p__Firmicutes|c__Bacilli|o__Lactobacillales|f__Leuconostocaceae|g__Leuconostoc	37	35	14	114	24	18	28	19	22	7	24	22	12	29	6	9	2	24	7	12	3	3	5	7	1	14	8	27	30	11	20	39	115	86	11	6	13	21	8	1	104	25	0	9	14	56	61	32	15
d__Bacteria|p__Firmicutes|c__Bacilli|o__Lactobacillales|f__Leuconostocaceae|g__Weissella|s__Weissella cibaria	22	18	6	8	5	20	58	24	10	16	9	4	22	11	5	5	29	17	20	7	4	17	36	15	7	7	0	2	1	5	26	23	14	35	25	6	16	19	5	14	17	17	15	30	4	2	8	16	9
d__Bacteria|p__Firmicutes|c__Bacilli|o__Lactobacillales|f__Streptococcaceae|g__Lactococcus|s__Lactococcus lactis	101	65	26	24	22	32	116	31	30	29	45	28	53	20	15	27	35	24	54	22	12	41	28	41	19	20	6	13	10	23	58	66	15	69	106	9	11	80	8	21	45	22	29	21	13	24	26	63	15
d__Bacteria|p__Firmicutes|c__Bacilli|o__Lactobacillales|f__Streptococcaceae|g__Lactococcus|s__Lactococcus piscium	17	11	9	52	4	17	9	3	14	3	9	6	14	11	4	0	3	6	0	0	3	2	1	0	8	1	3	19	6	3	13	6	31	40	0	8	5	17	3	3	11	5	1	1	2	48	96	37	9
d__Bacteria|p__Firmicutes|c__Bacilli|o__Lactobacillales|f__Streptococcaceae|g__Streptococcus	114	123	40	468	57	184	125	86	129	84	89	98	99	38	78	20	66	98	39	62	104	48	45	23	95	119	61	115	115	35	27	49	96	116	88	53	19	95	84	52	27	15	14	13	5	50	80	67	38
d__Bacteria|p__Firmicutes|c__Bacilli|o__Lactobacillales|f__Streptococcaceae|g__Streptococcus|s__Streptococcus acidominimus	184	121	59	661	40	363	205	131	174	151	156	217	148	96	162	30	64	147	32	76	155	62	99	70	176	297	137	319	178	107	17	40	159	124	41	37	34	208	140	115	41	37	28	59	16	78	120	112	75
d__Bacteria|p__Firmicutes|c__Bacilli|o__Lactobacillales|f__Streptococcaceae|g__Streptococcus|s__Streptococcus halotolerans	23	18	5	74	7	21	2	21	30	7	8	37	22	20	9	0	0	3	0	12	3	4	2	1	15	2	21	51	57	6	8	40	51	36	0	5	3	19	75	0	10	10	0	1	6	41	47	23	22
d__Bacteria|p__Firmicutes|c__Bacilli|o__Lactobacillales|f__Streptococcaceae|g__Streptococcus|s__Streptococcus suis	30	20	17	88	14	81	48	35	35	29	38	48	33	28	35	6	11	21	6	27	25	15	21	11	30	61	34	63	34	26	9	82	84	46	14	13	12	46	27	16	38	19	7	4	20	17	36	26	21
d__Bacteria|p__Firmicutes|c__Bacilli|o__Lactobacillales|f__Streptococcaceae|g__Streptococcus|s__Streptococcus thermophilus	47	39	15	45	18	39	61	31	28	26	18	19	37	18	13	22	65	37	54	15	16	22	25	25	21	8	10	20	19	7	51	68	32	55	93	10	11	47	11	17	24	29	17	19	7	13	20	33	4
d__Bacteria|p__Firmicutes|c__Clostridia	139	106	34	255	25	249	153	102	142	68	89	164	131	86	94	14	3	36	7	21	65	22	17	18	69	107	80	146	117	38	35	93	109	125	15	71	105	165	83	15	181	32	22	19	36	87	123	77	51
d__Bacteria|p__Firmicutes|c__Clostridia|o__Clostridiales	21123	11975	4336	46164	3583	57650	15121	18412	29584	18339	20361	37265	28164	11975	12695	7797	10204	14867	2438	13056	26832	3968	33312	14626	32785	25036	16195	39192	26033	12185	6368	13767	26690	18098	5844	7691	9410	24984	17147	9494	16206	13983	4380	5530	10766	8899	25666	14976	6385
d__Bacteria|p__Firmicutes|c__Clostridia|o__Clostridiales|f__Christensenellaceae|g__Christensenella|s__Christensenella massiliensis	99	74	16	183	13	201	111	78	147	58	92	204	92	80	49	6	16	35	3	23	22	20	33	15	56	85	83	146	182	58	34	61	81	77	21	52	67	110	56	37	109	23	17	16	20	57	43	47	26
d__Bacteria|p__Firmicutes|c__Clostridia|o__Clostridiales|f__Clostridiaceae	82	58	41	127	33	178	88	76	75	50	59	118	98	40	69	5	4	25	2	42	63	15	13	16	48	94	55	143	113	26	30	45	102	118	6	60	102	145	78	10	133	25	16	12	30	95	136	92	77
d__Bacteria|p__Firmicutes|c__Clostridia|o__Clostridiales|f__Clostridiaceae|g__Alkaliphilus|s__Alkaliphilus metalliredigens	23	14	6	3	1	5	59	30	18	13	2	8	9	16	6	2	0	1	1	1	0	2	8	6	1	3	2	1	7	0	7	3	22	15	3	3	51	10	9	4	66	18	1	6	1	46	39	44	22
d__Bacteria|p__Firmicutes|c__Clostridia|o__Clostridiales|f__Clostridiaceae|g__Clostridium	418	375	177	898	73	766	421	250	372	223	251	451	312	243	266	22	15	146	22	130	186	80	41	33	216	390	227	511	473	141	154	353	613	579	24	122	207	350	370	57	345	61	39	49	86	310	386	219	179
d__Bacteria|p__Firmicutes|c__Clostridia|o__Clostridiales|f__Clostridiaceae|g__Clostridium|s__Clostridium baratii	22	12	13	28	3	40	10	17	10	7	8	22	24	10	13	5	2	3	2	10	8	2	11	2	9	16	10	26	18	8	4	14	28	7	2	9	14	23	27	6	28	3	2	2	3	20	31	21	39
d__Bacteria|p__Firmicutes|c__Clostridia|o__Clostridiales|f__Clostridiaceae|g__Clostridium|s__Clostridium botulinum	83	96	31	86	20	115	58	48	66	30	38	52	45	31	30	16	18	32	9	20	34	13	20	11	37	65	32	67	53	23	30	46	73	75	43	74	85	87	48	17	71	35	23	13	20	31	51	39	35
d__Bacteria|p__Firmicutes|c__Clostridia|o__Clostridiales|f__Clostridiaceae|g__Clostridium|s__Clostridium chauvoei	170	92	74	235	18	355	136	149	178	87	141	245	121	142	120	16	5	54	2	48	108	30	16	6	131	236	201	264	367	110	56	113	136	107	3	40	29	66	150	7	124	6	17	8	67	67	139	64	53
d__Bacteria|p__Firmicutes|c__Clostridia|o__Clostridiales|f__Clostridiaceae|g__Clostridium|s__Clostridium formicaceticum	26	19	8	66	2	20	11	6	13	3	22	19	10	9	4	4	0	3	1	5	7	0	0	3	2	24	6	19	17	3	5	16	36	20	0	12	7	18	38	1	12	1	2	4	2	15	23	5	6
d__Bacteria|p__Firmicutes|c__Clostridia|o__Clostridiales|f__Clostridiaceae|g__Clostridium|s__Clostridium kluyveri	97	35	34	132	4	147	56	73	87	43	36	97	69	59	50	8	4	35	2	18	58	8	13	8	53	70	59	124	103	34	24	45	99	95	7	14	76	82	152	15	57	20	10	11	5	55	121	36	43
d__Bacteria|p__Firmicutes|c__Clostridia|o__Clostridiales|f__Clostridiaceae|g__Clostridium|s__Clostridium pasteurianum	59	66	20	127	17	51	22	14	20	15	17	47	24	5	15	1	2	21	1	22	13	7	1	3	15	23	18	34	22	13	16	34	69	74	9	9	4	16	14	2	16	5	0	3	4	29	39	15	27
d__Bacteria|p__Firmicutes|c__Clostridia|o__Clostridiales|f__Clostridiaceae|g__Clostridium|s__Clostridium perfringens	48	37	18	55	4	80	37	30	28	19	19	44	34	13	39	19	1	23	3	20	26	10	9	5	25	52	37	66	45	11	5	20	53	24	4	12	37	55	22	5	33	8	6	10	1	31	77	36	17
d__Bacteria|p__Firmicutes|c__Clostridia|o__Clostridiales|f__Clostridiaceae|g__Clostridium|s__Clostridium sp. SY8519	1612	1331	660	3450	299	3453	1402	1595	2104	881	2099	3184	1823	1542	1290	120	80	705	69	580	980	297	167	135	1184	2570	1616	2937	3965	1367	566	1067	1534	1533	84	508	357	835	1114	108	1555	136	146	168	566	954	1281	757	459
d__Bacteria|p__Firmicutes|c__Clostridia|o__Clostridiales|f__Clostridiaceae|g__Clostridium|s__Clostridium tetani	75	62	35	85	12	223	97	82	129	43	50	97	94	36	81	4	5	23	3	16	52	10	21	6	41	93	78	137	75	28	11	23	78	76	6	26	144	38	46	10	56	18	3	15	5	51	74	23	22
d__Bacteria|p__Firmicutes|c__Clostridia|o__Clostridiales|f__Clostridiaceae|g__Geosporobacter|s__Geosporobacter ferrireducens	25	29	8	68	8	59	30	27	46	16	25	33	19	17	23	5	3	10	2	11	18	4	9	9	19	48	26	45	28	18	6	14	58	27	4	16	11	22	43	5	31	11	0	6	9	25	42	24	21
d__Bacteria|p__Firmicutes|c__Clostridia|o__Clostridiales|f__Clostridiaceae|g__Mordavella|s__Mordavella sp. Marseille-P3756	2425	1168	749	4751	399	4692	1711	1619	2782	1344	2017	2977	1915	1286	1471	181	151	761	122	603	1095	276	342	275	1202	2776	1790	3232	2835	1084	784	1649	4136	2410	206	631	501	2019	2008	326	1892	623	165	272	501	1683	4035	1545	1795
d__Bacteria|p__Firmicutes|c__Clostridia|o__Clostridiales|f__Clostridiaceae|s__Clostridiaceae bacterium 14S0207	31	20	16	60	8	103	29	44	34	14	30	56	58	19	19	1	1	5	1	17	26	7	10	6	24	45	17	58	48	10	9	24	27	43	1	28	45	67	38	3	61	11	4	7	18	43	62	54	13
d__Bacteria|p__Firmicutes|c__Clostridia|o__Clostridiales|f__Clostridiales Family XIII. Incertae Sedis	64	61	66	99	9	97	73	71	53	32	52	80	58	21	52	13	6	37	8	21	46	11	31	11	34	70	33	63	42	14	28	36	49	83	13	46	37	62	46	9	48	7	12	9	9	30	36	27	24
d__Bacteria|p__Firmicutes|c__Clostridia|o__Clostridiales|f__Clostridiales Family XIII. Incertae Sedis|g__Mogibacterium	41	21	25	83	2	50	41	21	25	15	21	32	30	13	22	7	4	17	3	10	19	6	8	2	13	34	10	34	21	8	9	21	66	29	2	16	33	57	34	9	21	9	6	5	11	13	46	22	11
d__Bacteria|p__Firmicutes|c__Clostridia|o__Clostridiales|f__Clostridiales Family XIII. Incertae Sedis|s__[Eubacterium] sulci	61	52	62	95	9	92	65	64	47	29	49	77	52	20	47	11	5	35	8	20	45	11	30	10	31	66	31	60	40	14	23	34	47	74	9	43	35	56	41	9	44	7	11	9	9	25	33	25	23
d__Bacteria|p__Firmicutes|c__Clostridia|o__Clostridiales|f__Clostridiales Family XVII. Incertae Sedis|g__Thermaerobacter|s__Thermaerobacter marianensis	27	22	8	134	5	88	16	27	7	12	27	64	50	14	21	3	2	10	2	12	22	3	6	3	23	43	12	52	37	24	15	14	61	39	1	31	32	46	25	8	31	20	18	5	4	16	76	30	13
d__Bacteria|p__Firmicutes|c__Clostridia|o__Clostridiales|f__Eubacteriaceae|g__Acetobacterium	17	20	7	52	11	55	16	25	26	12	19	37	37	20	27	5	4	4	2	14	10	8	11	4	13	16	15	36	17	6	19	24	32	42	1	27	18	50	67	4	25	3	9	6	4	77	104	52	21
d__Bacteria|p__Firmicutes|c__Clostridia|o__Clostridiales|f__Eubacteriaceae|g__Acetobacterium|s__Acetobacterium woodii	26	13	7	29	1	11	8	4	9	6	10	16	13	2	11	0	0	2	0	9	9	1	5	0	12	9	7	9	5	7	2	8	59	23	1	1	3	8	4	2	8	7	0	0	5	42	78	44	10
d__Bacteria|p__Firmicutes|c__Clostridia|o__Clostridiales|f__Eubacteriaceae|g__Eubacterium	14	25	13	37	3	87	18	22	26	17	27	48	39	18	32	1	2	7	0	12	33	6	6	7	23	44	34	75	63	10	4	11	17	19	2	41	40	109	137	11	79	10	3	18	11	58	55	46	15
d__Bacteria|p__Firmicutes|c__Clostridia|o__Clostridiales|f__Eubacteriaceae|g__Eubacterium|s__[Eubacterium] cellulosolvens	580	463	249	1170	102	968	350	366	440	204	256	610	482	238	371	42	26	222	19	222	259	85	57	34	293	556	323	754	658	173	159	367	811	701	34	149	226	431	543	45	265	65	19	40	108	489	572	392	220
d__Bacteria|p__Firmicutes|c__Clostridia|o__Clostridiales|f__Eubacteriaceae|g__Eubacterium|s__[Eubacterium] eligens	758	538	311	1169	138	2076	910	829	1162	581	983	1303	878	772	622	42	37	257	34	281	514	188	95	79	585	1077	851	1468	1939	642	290	487	818	645	41	356	380	1225	1360	136	1095	74	78	102	275	676	870	531	233
d__Bacteria|p__Firmicutes|c__Clostridia|o__Clostridiales|f__Eubacteriaceae|g__Eubacterium|s__[Eubacterium] hallii	2014	1459	800	5124	350	4145	1774	1778	2446	1111	2028	3238	1953	1725	1495	160	148	870	79	712	1111	358	217	184	1397	2491	1755	3129	3813	1265	748	1435	2724	2466	241	682	452	1360	1753	219	1786	253	149	168	619	1667	2520	1218	1054
d__Bacteria|p__Firmicutes|c__Clostridia|o__Clostridiales|f__Eubacteriaceae|g__Eubacterium|s__Eubacterium limosum	111	55	38	152	18	214	111	94	149	73	38	137	77	70	92	23	34	42	15	21	91	41	44	32	59	49	80	132	93	39	57	92	178	138	60	49	56	219	188	74	70	17	21	26	26	59	103	69	74
d__Bacteria|p__Firmicutes|c__Clostridia|o__Clostridiales|f__Heliobacteriaceae|g__Heliobacterium|s__Heliobacterium modesticaldum	23	12	3	69	4	48	25	19	13	9	14	33	25	22	15	5	2	12	7	21	27	3	6	4	6	24	14	42	15	8	10	28	33	46	2	17	44	34	35	10	20	10	7	4	8	18	35	14	8
d__Bacteria|p__Firmicutes|c__Clostridia|o__Clostridiales|f__Hungateiclostridiaceae	176	99	42	410	25	483	170	142	245	180	200	277	211	122	147	88	104	132	31	109	245	40	328	132	295	238	147	292	166	131	51	106	264	206	59	85	523	326	191	97	210	173	68	67	96	66	232	134	89
d__Bacteria|p__Firmicutes|c__Clostridia|o__Clostridiales|f__Hungateiclostridiaceae|g__Fastidiosipila|s__Fastidiosipila sanguinis	28	43	12	72	10	98	51	48	35	16	26	52	37	20	33	8	0	15	7	9	15	13	10	0	21	50	20	55	47	6	23	40	42	84	14	30	59	66	41	8	60	13	11	14	15	57	38	24	16
d__Bacteria|p__Firmicutes|c__Clostridia|o__Clostridiales|f__Hungateiclostridiaceae|g__Hungateiclostridium	104	24	31	89	8	113	25	36	46	36	19	92	38	30	24	6	1	15	1	4	38	10	6	5	27	62	47	103	78	14	16	34	80	68	2	6	59	57	116	4	40	0	7	4	2	81	64	41	59
d__Bacteria|p__Firmicutes|c__Clostridia|o__Clostridiales|f__Hungateiclostridiaceae|g__Hungateiclostridium|s__Hungateiclostridium clariflavum	18	30	12	49	4	65	65	19	29	24	26	75	67	8	43	0	1	12	2	13	40	2	0	3	18	53	31	88	40	20	4	15	16	65	1	25	28	126	33	11	84	17	10	7	2	149	54	83	39
d__Bacteria|p__Firmicutes|c__Clostridia|o__Clostridiales|f__Hungateiclostridiaceae|g__Hungateiclostridium|s__Hungateiclostridium saccincola	92	114	60	420	21	316	155	158	109	79	98	196	198	88	198	11	8	78	10	62	109	33	30	11	104	176	86	220	183	53	32	88	101	155	10	104	132	196	132	24	156	55	19	27	18	77	107	51	35
d__Bacteria|p__Firmicutes|c__Clostridia|o__Clostridiales|f__Hungateiclostridiaceae|g__Mageeibacillus|s__Mageeibacillus indolicus	48	44	15	63	10	129	40	37	46	21	43	72	54	27	44	5	2	5	4	15	26	14	9	2	21	62	34	73	64	13	14	34	50	63	2	31	33	40	38	4	57	5	5	2	23	29	33	20	18
d__Bacteria|p__Firmicutes|c__Clostridia|o__Clostridiales|f__Hungateiclostridiaceae|g__Pseudoclostridium|s__Pseudoclostridium thermosuccinogenes	68	97	88	54	19	79	87	53	34	46	15	21	20	28	23	5	4	22	7	14	65	10	32	2	25	31	2	16	12	6	21	42	45	48	17	62	220	97	63	20	100	32	28	14	9	77	42	35	42
d__Bacteria|p__Firmicutes|c__Clostridia|o__Clostridiales|f__Hungateiclostridiaceae|g__Thermoclostridium|s__Thermoclostridium stercorarium	14	10	7	80	5	35	12	15	30	21	3	26	19	7	19	2	1	13	0	10	10	6	5	6	13	10	14	27	20	8	6	31	18	49	7	28	10	31	47	7	16	10	1	1	3	12	26	17	6
d__Bacteria|p__Firmicutes|c__Clostridia|o__Clostridiales|f__Hungateiclostridiaceae|s__Hungateiclostridiaceae bacterium KB18	144	48	21	379	22	383	85	110	204	114	176	252	173	92	132	80	100	119	28	107	217	28	293	126	281	201	133	254	145	128	30	72	211	97	48	35	46	169	124	73	83	140	33	40	82	35	204	109	49
d__Bacteria|p__Firmicutes|c__Clostridia|o__Clostridiales|f__Lachnospiraceae	5591	3733	1700	12370	966	11844	5512	5032	7648	3465	6283	9474	5435	4963	3796	393	344	2018	217	1702	2724	891	705	620	3503	6917	5308	9031	10759	4244	1977	3749	6517	5624	521	1798	1323	3740	4492	767	5260	875	475	570	1661	3332	5717	2659	1886
d__Bacteria|p__Firmicutes|c__Clostridia|o__Clostridiales|f__Lachnospiraceae|g__Anaerostipes|s__Anaerostipes hadrus	1248	929	465	2607	227	2423	1225	1284	1775	687	1357	2149	1272	905	749	105	93	429	68	434	722	189	204	175	693	1729	1023	2015	2016	715	405	805	1806	1327	136	358	254	1012	1226	244	1333	276	108	144	336	737	1794	705	546
d__Bacteria|p__Firmicutes|c__Clostridia|o__Clostridiales|f__Lachnospiraceae|g__Anaerotignum|s__Anaerotignum propionicum	506	340	187	620	64	598	248	207	277	137	198	427	227	178	235	49	18	129	6	125	146	32	31	54	138	438	250	527	330	82	110	488	699	596	33	246	169	584	1167	44	396	30	36	52	76	163	235	114	91
d__Bacteria|p__Firmicutes|c__Clostridia|o__Clostridiales|f__Lachnospiraceae|g__Blautia	2949	1919	1074	5783	483	6445	2547	2662	3901	1696	3109	5004	3042	2614	2138	215	124	1105	86	900	1504	492	383	332	2023	4090	2947	5418	6783	2167	966	1919	2805	2846	134	858	598	1547	2318	276	2863	338	240	241	1360	1613	2395	1197	1156
d__Bacteria|p__Firmicutes|c__Clostridia|o__Clostridiales|f__Lachnospiraceae|g__Blautia|s__Blautia hansenii	777	443	245	2658	119	1560	390	579	1086	489	568	1289	774	390	535	86	119	318	58	301	377	103	138	120	427	769	658	1328	1047	428	228	483	1366	974	140	344	218	773	768	378	549	255	94	123	111	643	1239	557	357
d__Bacteria|p__Firmicutes|c__Clostridia|o__Clostridiales|f__Lachnospiraceae|g__Blautia|s__Blautia sp. N6H1-15	665	666	351	4678	198	1020	564	384	429	412	409	527	453	342	541	79	113	350	88	339	645	146	166	102	472	628	367	750	591	186	202	445	1191	911	92	168	248	601	579	151	242	132	38	63	87	773	1403	552	404
d__Bacteria|p__Firmicutes|c__Clostridia|o__Clostridiales|f__Lachnospiraceae|g__Butyrivibrio	1466	866	418	2599	198	2999	1323	1167	1790	833	1525	2524	1374	1451	1040	111	48	476	34	409	641	238	123	112	914	1975	1549	2520	3598	1131	534	986	1273	1474	61	459	374	727	1346	115	1524	115	86	165	552	787	908	513	546
d__Bacteria|p__Firmicutes|c__Clostridia|o__Clostridiales|f__Lachnospiraceae|g__Butyrivibrio|s__Butyrivibrio fibrisolvens	2451	1888	1079	5855	490	5914	2644	2297	3078	1530	3049	4593	2765	2460	2269	174	120	1187	81	990	1764	547	221	147	2052	4192	2702	4793	6184	2039	885	1880	2478	2808	115	826	723	1587	2405	180	2503	220	186	215	966	1676	2586	1314	1024
d__Bacteria|p__Firmicutes|c__Clostridia|o__Clostridiales|f__Lachnospiraceae|g__Butyrivibrio|s__Butyrivibrio hungatei	458	331	224	1489	80	805	335	286	531	304	397	614	372	332	337	18	24	205	23	244	221	56	39	34	196	528	398	799	705	337	161	460	833	882	41	242	144	498	528	91	381	73	35	47	86	332	703	328	313
d__Bacteria|p__Firmicutes|c__Clostridia|o__Clostridiales|f__Lachnospiraceae|g__Butyrivibrio|s__Butyrivibrio proteoclasticus	56	27	17	92	12	111	43	55	65	43	64	108	59	47	49	7	1	24	0	19	27	12	9	6	38	91	83	92	155	55	19	47	37	39	2	15	43	62	52	10	60	12	8	4	23	54	105	43	50
d__Bacteria|p__Firmicutes|c__Clostridia|o__Clostridiales|f__Lachnospiraceae|g__Cellulosilyticum|s__Cellulosilyticum lentocellum	311	232	78	535	35	728	290	279	559	174	467	700	334	353	165	26	7	99	8	60	108	45	25	37	197	481	272	520	930	300	107	216	266	251	10	63	28	106	198	13	356	17	31	29	94	129	145	96	82
d__Bacteria|p__Firmicutes|c__Clostridia|o__Clostridiales|f__Lachnospiraceae|g__Herbinix|s__Herbinix luporum	1480	1093	523	3642	261	2865	1280	1183	1636	820	1401	2163	1359	1334	964	84	45	625	50	575	684	233	124	108	919	1745	1178	2199	2637	792	617	1110	1886	1935	69	460	325	1113	1304	148	1269	120	103	119	374	1060	1399	762	558
d__Bacteria|p__Firmicutes|c__Clostridia|o__Clostridiales|f__Lachnospiraceae|g__Lachnoclostridium	2982	2026	1024	5571	485	6527	2511	2599	3906	1559	3267	4618	2966	2465	2088	172	161	1107	110	984	1629	498	296	306	1799	3924	2848	4999	6143	2074	1055	1998	3229	2958	156	930	759	2023	2687	346	2967	352	240	290	970	2002	2908	1561	1202
d__Bacteria|p__Firmicutes|c__Clostridia|o__Clostridiales|f__Lachnospiraceae|g__Lachnoclostridium|s__[Clostridium] bolteae	1748	1102	491	5551	349	4720	1766	1490	3581	1867	2539	3698	2009	1953	1662	393	769	1338	294	717	2284	597	996	954	2231	3446	2343	3567	3998	2724	373	1017	2627	1132	374	433	650	1675	1364	1131	1489	1048	407	575	829	689	2102	938	505
d__Bacteria|p__Firmicutes|c__Clostridia|o__Clostridiales|f__Lachnospiraceae|g__Lachnoclostridium|s__[Clostridium] saccharolyticum	86	30	22	113	11	103	25	42	54	53	33	59	34	37	35	5	8	30	6	19	23	13	13	7	24	73	40	52	49	17	15	25	82	41	6	13	24	54	77	8	25	13	8	7	10	20	37	22	25
d__Bacteria|p__Firmicutes|c__Clostridia|o__Clostridiales|f__Lachnospiraceae|g__Lachnoclostridium|s__[Clostridium] sphenoides	262	132	97	452	27	495	118	161	232	132	118	298	167	93	124	11	14	66	4	53	109	21	24	29	129	225	152	367	197	55	75	132	279	276	8	77	37	206	156	25	82	26	11	16	6	114	247	99	158
d__Bacteria|p__Firmicutes|c__Clostridia|o__Clostridiales|f__Lachnospiraceae|g__Lachnoclostridium|s__Lachnoclostridium phocaeense	11300	6212	2809	18868	1532	27967	9406	11915	19409	7931	19051	27142	10296	12749	7241	735	549	3812	270	2796	4333	1630	1113	1020	7788	18792	19449	22553	43881	13207	4443	8183	10274	8548	527	2496	624	2929	6741	813	14780	746	758	1079	4304	4588	6715	3461	2295
d__Bacteria|p__Firmicutes|c__Clostridia|o__Clostridiales|f__Lachnospiraceae|g__Lachnoclostridium|s__Lachnoclostridium phytofermentans	608	435	242	1166	114	1153	432	454	645	282	670	891	536	483	355	52	31	233	26	196	246	82	53	52	346	740	466	905	1299	387	207	420	595	559	42	177	157	443	638	67	602	47	33	67	151	383	543	313	206
d__Bacteria|p__Firmicutes|c__Clostridia|o__Clostridiales|f__Lachnospiraceae|g__Lachnoclostridium|s__Lachnoclostridium sp. YL32	33109	16818	6131	104019	4394	104985	27392	36329	70764	33409	57640	90093	38323	37694	25925	3103	3005	13605	1648	9313	23794	6336	6440	5433	32313	58137	57081	83481	111605	44260	12262	25326	34718	31263	3534	8765	3116	11530	24257	5460	40456	5635	3250	4828	10158	9620	24765	10010	5963
d__Bacteria|p__Firmicutes|c__Clostridia|o__Clostridiales|f__Lachnospiraceae|g__Roseburia|s__Roseburia hominis	1305	833	398	3459	263	2806	1036	1209	1526	867	1057	2036	1234	1048	1008	179	248	635	120	501	711	307	333	294	988	1642	1190	2117	2293	902	404	914	1938	1234	338	475	344	1482	1209	426	1171	569	167	273	317	703	2179	811	503
d__Bacteria|p__Firmicutes|c__Clostridia|o__Clostridiales|f__Lachnospiraceae|s__[Eubacterium] rectale	720	437	158	2123	118	1805	1517	806	1008	596	1102	1491	828	894	582	97	102	296	48	257	517	165	175	131	612	1205	1057	1390	1712	1014	225	439	709	620	205	240	190	573	597	177	601	160	81	112	228	249	679	297	249
d__Bacteria|p__Firmicutes|c__Clostridia|o__Clostridiales|f__Lachnospiraceae|s__Lachnospiraceae bacterium oral taxon 500	161	157	87	412	25	332	144	184	214	99	90	270	204	113	139	14	8	70	5	48	89	31	31	39	110	147	115	265	193	74	50	168	169	244	28	131	156	232	306	47	257	49	36	38	49	187	189	130	116
d__Bacteria|p__Firmicutes|c__Clostridia|o__Clostridiales|f__Oscillospiraceae|g__Oscillibacter|s__Oscillibacter valericigenes	1128	938	372	2357	169	2207	957	644	664	348	576	1153	875	561	646	172	87	403	104	436	813	226	226	179	684	1288	500	1399	841	247	358	894	2303	1811	162	630	938	1362	1683	367	931	346	142	208	279	956	1727	761	649
d__Bacteria|p__Firmicutes|c__Clostridia|o__Clostridiales|f__Peptococcaceae	21	25	3	34	3	31	28	17	20	10	14	16	18	13	9	3	3	6	1	6	17	6	8	3	14	14	7	15	16	5	7	18	57	15	8	7	12	26	19	5	13	12	2	3	8	18	32	30	8
d__Bacteria|p__Firmicutes|c__Clostridia|o__Clostridiales|f__Peptococcaceae|g__Dehalobacterium|s__Dehalobacterium formicoaceticum	30	21	7	55	7	57	16	18	22	16	19	26	19	16	33	14	8	12	1	13	17	3	6	6	8	26	12	40	22	12	19	18	45	47	8	3	19	56	33	8	13	2	3	2	5	35	50	31	13
d__Bacteria|p__Firmicutes|c__Clostridia|o__Clostridiales|f__Peptococcaceae|g__Desulfofarcimen|s__Desulfofarcimen acetoxidans	56	42	25	78	11	113	32	30	56	40	34	84	23	20	30	3	3	17	0	12	34	5	15	1	41	75	37	89	34	15	14	22	64	51	4	20	49	48	47	8	22	7	8	2	4	47	73	33	39
d__Bacteria|p__Firmicutes|c__Clostridia|o__Clostridiales|f__Peptococcaceae|g__Desulfosporosinus|s__Desulfosporosinus orientis	10	6	3	13	2	27	11	22	40	12	35	34	13	31	16	2	1	8	1	8	9	2	0	3	10	34	39	28	53	42	6	10	8	5	0	5	0	5	7	0	15	0	3	2	14	1	7	3	1
d__Bacteria|p__Firmicutes|c__Clostridia|o__Clostridiales|f__Peptococcaceae|g__Desulfotomaculum	168	137	58	249	37	510	164	197	392	113	290	404	224	281	142	7	5	81	6	64	93	30	13	18	152	317	228	383	652	228	84	181	133	175	4	73	6	35	169	7	289	6	27	17	86	117	139	88	58
d__Bacteria|p__Firmicutes|c__Clostridia|o__Clostridiales|f__Peptococcaceae|g__Desulfotomaculum|s__Desulfotomaculum nigrificans	11	14	3	33	5	39	24	18	24	7	8	24	17	12	3	2	1	4	0	9	12	1	5	2	12	9	12	43	11	6	11	23	30	18	0	10	16	26	27	4	21	8	5	4	4	10	10	6	1
d__Bacteria|p__Firmicutes|c__Clostridia|o__Clostridiales|f__Peptococcaceae|g__Thermincola|s__Thermincola potens	13	20	6	44	1	14	19	8	11	7	8	13	5	12	10	3	0	4	1	4	4	3	0	1	6	8	3	13	15	3	6	13	39	18	7	4	13	38	15	3	22	14	1	4	3	18	18	20	2
d__Bacteria|p__Firmicutes|c__Clostridia|o__Clostridiales|f__Peptostreptococcaceae	8	25	3	19	5	31	21	11	21	8	5	20	25	15	6	2	2	3	1	2	8	7	3	4	7	21	7	33	16	4	0	19	21	16	1	50	41	54	24	12	16	4	16	5	19	21	18	20	5
d__Bacteria|p__Firmicutes|c__Clostridia|o__Clostridiales|f__Peptostreptococcaceae|g__Acetoanaerobium|s__Acetoanaerobium sticklandii	23	13	8	21	3	30	25	11	10	10	12	32	18	7	12	0	4	2	0	10	10	1	0	0	8	24	20	44	24	8	4	8	26	20	0	9	7	26	12	1	16	3	1	2	4	14	17	7	7
d__Bacteria|p__Firmicutes|c__Clostridia|o__Clostridiales|f__Peptostreptococcaceae|g__Clostridioides|s__Clostridioides difficile	337	199	75	1573	50	1080	382	386	445	363	245	612	417	347	498	137	250	291	101	214	414	200	310	264	419	378	363	760	516	334	165	381	561	669	221	265	320	956	469	382	386	450	159	188	93	169	586	314	206
d__Bacteria|p__Firmicutes|c__Clostridia|o__Clostridiales|f__Peptostreptococcaceae|g__Filifactor|s__Filifactor alocis	183	206	135	568	50	257	262	33	46	116	29	60	32	95	118	7	16	72	5	97	71	36	12	10	98	63	62	169	117	24	88	210	402	474	14	53	102	375	347	14	133	18	11	14	22	327	241	176	214
d__Bacteria|p__Firmicutes|c__Clostridia|o__Clostridiales|f__Peptostreptococcaceae|g__Paeniclostridium|s__Paeniclostridium sordellii	56	56	22	151	10	14	7	4	6	4	6	13	2	4	7	3	4	13	1	22	8	0	3	1	3	8	1	12	7	0	18	52	104	104	6	6	4	1	0	1	5	4	1	0	1	64	70	63	50
d__Bacteria|p__Firmicutes|c__Clostridia|o__Clostridiales|f__Peptostreptococcaceae|g__Peptoclostridium|s__Peptoclostridium acidaminophilum	46	70	12	63	3	85	32	26	77	21	43	60	45	28	17	3	5	7	0	3	7	7	4	7	23	36	31	41	50	16	16	30	39	55	3	17	19	41	27	2	53	5	8	3	12	21	32	15	9
d__Bacteria|p__Firmicutes|c__Clostridia|o__Clostridiales|f__Peptostreptococcaceae|s__Peptostreptococcaceae bacterium oral taxon 929	5	22	2	16	5	24	19	10	17	6	5	17	17	13	4	2	2	2	1	1	8	7	3	4	5	15	6	28	13	4	0	18	18	14	1	49	40	48	19	10	14	4	15	2	19	11	13	7	3
d__Bacteria|p__Firmicutes|c__Clostridia|o__Clostridiales|f__Ruminococcaceae	330	362	118	840	97	683	361	233	274	152	186	400	282	176	234	44	31	123	28	110	172	86	76	40	211	319	153	482	242	63	148	318	541	658	42	274	397	400	416	101	344	119	75	43	83	453	529	314	197
d__Bacteria|p__Firmicutes|c__Clostridia|o__Clostridiales|f__Ruminococcaceae|g__Acutalibacter|s__Acutalibacter muris	152	51	27	349	21	360	80	111	156	151	122	195	162	95	119	67	91	112	21	104	186	29	320	134	271	185	128	232	136	71	35	103	220	111	72	52	51	226	143	79	56	164	38	55	71	56	279	109	44
d__Bacteria|p__Firmicutes|c__Clostridia|o__Clostridiales|f__Ruminococcaceae|g__Ethanoligenens|s__Ethanoligenens harbinense	94	90	37	252	22	259	72	79	91	40	57	130	95	61	74	22	19	42	16	43	80	23	28	21	90	86	50	127	85	31	28	54	141	81	27	29	42	97	127	34	81	39	18	19	45	79	120	73	43
d__Bacteria|p__Firmicutes|c__Clostridia|o__Clostridiales|f__Ruminococcaceae|g__Faecalibacterium|s__Faecalibacterium prausnitzii	2447	1626	564	9615	456	6711	2402	2101	4129	2109	2974	4554	2763	2341	2416	598	770	1541	436	1246	2596	654	1058	932	2291	4245	3166	4627	4841	3250	808	2188	5564	2973	880	1063	1022	3416	3090	1601	2694	1856	602	938	839	1551	7403	2641	1348
d__Bacteria|p__Firmicutes|c__Clostridia|o__Clostridiales|f__Ruminococcaceae|g__Flavonifractor|s__Flavonifractor plautii	1067	733	275	3410	255	2543	1076	673	904	611	653	1563	984	822	1048	397	494	719	234	661	1158	324	805	631	1055	1155	616	1760	840	594	482	1405	2463	1920	632	816	964	1784	2186	913	1051	1090	332	516	647	732	2361	1070	598
d__Bacteria|p__Firmicutes|c__Clostridia|o__Clostridiales|f__Ruminococcaceae|g__Ruminococcus	225	256	120	384	64	716	335	341	379	150	340	475	328	251	195	29	16	83	12	84	131	56	51	31	188	416	216	464	510	187	114	313	263	386	21	144	212	202	241	41	435	77	30	37	124	522	244	331	250
d__Bacteria|p__Firmicutes|c__Clostridia|o__Clostridiales|f__Ruminococcaceae|g__Ruminococcus|s__Ruminococcus albus	14	34	14	28	4	58	14	12	12	14	12	34	12	14	24	2	2	8	2	5	7	3	15	4	17	14	20	28	14	2	5	13	20	21	3	18	8	27	18	5	12	8	5	2	0	70	20	41	10
d__Bacteria|p__Firmicutes|c__Clostridia|o__Clostridiales|f__Ruminococcaceae|g__Ruminococcus|s__Ruminococcus bicirculans	102	96	22	250	11	176	157	58	100	37	102	105	72	43	46	18	4	26	4	33	47	9	13	19	42	141	52	138	78	33	43	68	145	107	71	20	77	70	70	27	73	21	8	5	22	297	196	183	111
d__Bacteria|p__Firmicutes|c__Clostridia|o__Clostridiales|f__Ruminococcaceae|g__Ruminococcus|s__Ruminococcus champanellensis	103	197	81	153	19	301	114	109	113	39	67	145	114	53	144	28	5	44	2	36	75	25	16	13	89	115	55	167	119	25	67	120	157	306	14	71	76	191	188	33	123	27	19	15	52	2466	534	1425	681
d__Bacteria|p__Firmicutes|c__Clostridia|o__Clostridiales|f__Ruminococcaceae|s__[Clostridium] cellulosi	104	103	37	204	35	124	110	53	59	41	38	78	76	45	69	17	11	42	12	37	48	25	24	13	57	107	26	98	66	8	39	84	184	168	12	103	181	132	118	35	105	49	23	19	25	183	229	115	79
d__Bacteria|p__Firmicutes|c__Clostridia|o__Clostridiales|f__Ruminococcaceae|s__Ruminococcaceae bacterium CPB6	136	120	49	406	33	265	107	91	117	62	84	175	117	73	84	15	12	42	6	29	58	29	30	10	87	107	67	189	98	28	65	115	223	258	11	86	82	103	157	34	113	35	19	7	12	107	152	97	50
d__Bacteria|p__Firmicutes|c__Clostridia|o__Clostridiales|f__Syntrophomonadaceae|g__Syntrophomonas|s__Syntrophomonas wolfei	71	55	22	111	15	248	97	108	147	49	175	129	63	95	52	1	3	27	0	21	33	13	5	7	51	124	97	152	227	78	42	61	53	75	0	34	12	44	70	4	140	1	8	4	49	36	29	29	25
d__Bacteria|p__Firmicutes|c__Clostridia|o__Clostridiales|g__Intestinimonas|s__Intestinimonas butyriciproducens	810	588	177	1859	184	2191	781	724	1100	503	889	1614	812	564	582	134	97	315	59	289	483	143	243	144	607	1070	739	1444	1407	488	312	753	1341	973	192	341	388	812	970	265	867	307	113	156	293	378	891	466	219
d__Bacteria|p__Firmicutes|c__Clostridia|o__Clostridiales|g__Monoglobus|s__Monoglobus pectinilyticus	88	130	34	340	23	234	58	66	112	94	58	142	86	54	91	24	25	50	17	44	70	38	43	30	76	87	85	187	76	70	26	93	118	124	21	259	115	357	272	77	176	89	67	38	18	106	216	104	43
d__Bacteria|p__Firmicutes|c__Clostridia|o__Thermoanaerobacterales|f__Thermoanaerobacteraceae|g__Ammonifex|s__Ammonifex degensii	13	18	10	34	4	60	1	34	18	6	30	35	27	10	22	1	1	1	0	4	18	13	4	2	18	21	10	39	44	8	9	6	11	3	0	11	15	40	20	2	32	10	1	6	3	21	33	29	3
d__Bacteria|p__Firmicutes|c__Clostridia|o__Thermoanaerobacterales|f__Thermoanaerobacteraceae|g__Thermacetogenium|s__Thermacetogenium phaeum	7	9	4	5	3	41	30	19	18	17	2	15	8	13	8	3	2	2	4	0	7	6	11	1	3	3	5	4	5	2	6	9	19	37	1	7	77	25	17	8	29	2	1	3	1	27	10	15	24
d__Bacteria|p__Firmicutes|c__Clostridia|o__Thermoanaerobacterales|f__Thermoanaerobacterales Family III. Incertae Sedis|g__Caldicellulosiruptor	9	11	1	3	0	21	23	10	19	9	4	3	5	16	3	2	3	3	0	0	7	3	10	1	2	6	3	2	2	0	7	9	8	18	3	7	113	14	16	6	26	3	2	5	0	15	8	10	23
d__Bacteria|p__Firmicutes|c__Clostridia|o__Thermoanaerobacterales|f__Thermoanaerobacterales Family III. Incertae Sedis|g__Thermoanaerobacterium|s__Thermoanaerobacterium thermosaccharolyticum	54	36	26	92	24	57	24	13	19	17	11	35	20	10	12	3	3	20	4	12	6	2	1	1	8	31	18	40	17	4	10	10	47	47	3	9	4	35	13	2	25	1	2	2	6	25	69	16	22
d__Bacteria|p__Firmicutes|c__Clostridia|o__Thermoanaerobacterales|f__Thermoanaerobacterales Family III. Incertae Sedis|g__Thermosediminibacter|s__Thermosediminibacter oceani	25	8	4	34	10	41	23	23	9	20	10	28	25	7	12	1	2	7	2	7	6	5	3	2	35	26	8	22	11	8	3	27	25	11	0	6	1	6	12	0	17	8	0	1	5	0	8	3	8
d__Bacteria|p__Firmicutes|c__Erysipelotrichia|o__Erysipelotrichales|f__Erysipelotrichaceae	1625	1007	397	5902	274	4007	944	1618	3651	1312	2915	4018	1834	2174	1143	442	528	1241	260	864	1621	433	701	695	1888	3337	2331	3150	5269	3341	828	1551	2716	1816	528	394	263	1093	973	480	1842	443	433	516	700	968	2191	1231	818
d__Bacteria|p__Firmicutes|c__Erysipelotrichia|o__Erysipelotrichales|f__Erysipelotrichaceae|g__Erysipelatoclostridium|s__[Clostridium] innocuum	23	9	1	140	6	66	13	28	62	18	56	49	28	40	17	11	18	20	5	20	37	15	8	7	35	66	35	56	89	70	12	30	42	19	14	10	1	10	13	4	27	6	6	2	12	12	32	25	7
d__Bacteria|p__Firmicutes|c__Erysipelotrichia|o__Erysipelotrichales|f__Erysipelotrichaceae|g__Faecalibaculum|s__Faecalibaculum rodentium	10	18	6	34	5	16	14	9	13	5	37	15	11	5	11	1	10	6	2	5	2	4	6	1	7	54	5	20	5	3	9	15	24	16	3	7	2	36	0	4	17	7	7	1	2	7	7	6	5
d__Bacteria|p__Firmicutes|c__Erysipelotrichia|o__Erysipelotrichales|f__Erysipelotrichaceae|g__Faecalitalea|s__Faecalitalea cylindroides	60	32	26	120	15	56	100	59	54	42	77	71	35	54	37	14	22	26	10	37	34	72	31	22	102	114	26	50	40	26	24	35	92	78	20	27	35	219	41	64	62	42	30	18	11	53	100	65	32
d__Bacteria|p__Firmicutes|c__Negativicutes|o__Acidaminococcales|f__Acidaminococcaceae|g__Acidaminococcus|s__Acidaminococcus fermentans	26	12	3	34	11	64	23	10	20	7	13	31	3	13	14	3	0	9	1	6	8	2	0	1	15	15	8	23	6	2	8	31	43	32	1	9	5	27	33	4	21	7	2	1	8	24	42	20	7
d__Bacteria|p__Firmicutes|c__Negativicutes|o__Acidaminococcales|f__Acidaminococcaceae|g__Acidaminococcus|s__Acidaminococcus intestini	94	71	38	137	13	241	76	83	173	43	115	155	76	91	43	4	3	25	2	21	36	15	7	3	64	124	96	156	198	95	43	79	80	81	1	9	1	11	52	4	113	0	13	3	36	45	29	30	27
d__Bacteria|p__Firmicutes|c__Negativicutes|o__Veillonellales|f__Veillonellaceae	14	18	11	31	5	76	25	25	49	9	39	40	39	12	29	2	0	12	0	0	19	7	3	1	16	35	13	39	35	10	2	7	7	2	0	3	4	10	1	0	3	0	0	3	0	1	5	0	1
d__Bacteria|p__Firmicutes|c__Negativicutes|o__Veillonellales|f__Veillonellaceae|g__Megasphaera|s__Megasphaera sp. AJH120	109	57	18	258	8	380	95	84	265	105	133	304	143	79	60	6	1	19	1	11	56	16	9	6	91	135	110	238	275	88	18	41	54	95	4	25	22	40	90	4	153	8	2	4	15	25	45	9	8
d__Bacteria|p__Firmicutes|c__Tissierellia	16	14	3	27	1	19	13	9	8	12	10	5	3	13	6	3	0	2	0	4	5	4	1	4	4	29	8	10	6	4	4	4	21	17	2	9	11	28	38	2	21	3	7	1	1	18	12	12	5
d__Bacteria|p__Firmicutes|c__Tissierellia|o__Tissierellales|f__Peptoniphilaceae|g__Parvimonas|s__Parvimonas micra	40	38	20	43	6	89	7	27	28	10	20	43	35	13	17	3	1	8	0	6	19	4	2	1	12	31	19	54	32	14	10	27	32	38	2	16	22	49	49	4	36	4	0	5	5	25	34	30	20
d__Bacteria|p__Fusobacteria|c__Fusobacteriia|o__Fusobacteriales|f__Fusobacteriaceae|g__Fusobacterium	61	96	25	74	29	115	60	72	129	30	70	115	70	54	18	1	1	12	0	13	22	8	3	3	17	63	38	58	96	49	58	42	28	58	1	14	19	22	21	1	71	2	2	5	15	25	14	23	14
d__Bacteria|p__Fusobacteria|c__Fusobacteriia|o__Fusobacteriales|f__Leptotrichiaceae|g__Leptotrichia|s__Leptotrichia sp. oral taxon 212	16	16	1	11	0	4	32	33	38	1	10	6	1	4	2	2	1	2	2	0	0	3	3	9	0	7	2	1	3	0	6	22	15	55	0	17	16	63	10	3	62	9	4	2	16	27	6	16	14
d__Bacteria|p__Proteobacteria	159	173	32	181	49	212	141	96	191	101	76	142	123	68	50	19	21	158	12	19	30	45	26	24	55	69	61	125	96	38	61	64	116	226	56	37	66	181	64	24	113	35	36	17	10	227	72	57	61
d__Bacteria|p__Proteobacteria|c__Alphaproteobacteria	44	55	6	57	11	45	47	25	33	17	17	27	20	21	12	7	1	6	5	11	7	8	9	3	10	15	14	27	30	7	26	13	30	55	17	13	18	35	15	7	40	8	6	5	1	17	20	18	9
d__Bacteria|p__Proteobacteria|c__Betaproteobacteria	38	31	10	33	6	39	30	19	30	13	15	33	21	7	19	2	3	8	3	2	4	6	0	6	8	15	5	24	16	7	13	11	14	17	6	8	7	36	7	2	23	3	3	3	6	7	10	6	8
d__Bacteria|p__Proteobacteria|c__Betaproteobacteria|o__Burkholderiales	10	20	6	21	10	19	12	3	10	7	6	9	8	9	11	2	3	7	2	2	7	6	4	11	7	8	1	11	4	3	19	6	33	17	15	5	6	40	8	6	9	10	8	2	1	10	14	9	11
d__Bacteria|p__Proteobacteria|c__Betaproteobacteria|o__Burkholderiales|f__Burkholderiaceae|g__Ralstonia	27	13	27	24	11	12	3	11	12	14	32	28	17	15	26	13	27	29	17	5	15	29	14	53	15	22	13	21	12	13	11	20	31	14	56	7	15	72	14	45	14	20	29	5	8	1	25	4	37
d__Bacteria|p__Proteobacteria|c__Betaproteobacteria|o__Burkholderiales|f__Burkholderiaceae|g__Ralstonia|s__Ralstonia mannitolilytica	27	25	56	61	14	6	5	35	49	28	44	32	22	53	52	34	58	63	55	14	20	30	37	70	31	29	15	20	32	13	9	42	51	22	66	10	22	161	11	60	15	17	54	9	16	15	33	14	86
d__Bacteria|p__Proteobacteria|c__Betaproteobacteria|o__Burkholderiales|f__Burkholderiaceae|g__Ralstonia|s__Ralstonia pickettii	321	211	610	444	176	134	92	271	438	352	466	324	298	360	554	380	547	672	552	193	389	371	369	885	399	323	266	243	199	330	193	515	576	253	968	221	272	1598	198	827	168	483	527	236	195	180	346	173	993
d__Bacteria|p__Proteobacteria|c__Deltaproteobacteria|o__Desulfovibrionales	28	27	8	50	3	78	31	53	95	17	81	97	34	61	13	0	0	13	0	4	14	7	1	1	18	56	59	39	121	44	11	28	29	22	0	9	1	4	14	0	43	0	6	3	12	8	6	9	0
d__Bacteria|p__Proteobacteria|c__Gammaproteobacteria	106	121	73	47	62	62	98	73	85	108	53	80	58	35	15	5	9	79	19	16	10	36	13	8	10	23	23	31	29	23	47	38	40	76	32	24	40	55	23	7	50	12	8	10	20	106	43	43	55
d__Bacteria|p__Proteobacteria|c__Gammaproteobacteria|o__Enterobacterales|f__Enterobacteriaceae	30	22	58	59	18	32	22	28	38	20	24	33	32	20	22	17	55	45	24	16	22	25	41	42	24	24	10	38	34	25	29	49	30	52	370	15	29	180	22	54	30	49	22	52	14	27	47	192	76
d__Bacteria|p__Proteobacteria|c__Gammaproteobacteria|o__Enterobacterales|f__Enterobacteriaceae|g__Escherichia|s__Escherichia coli	10	7	3	11	5	10	8	8	10	4	13	16	11	7	4	2	10	4	3	10	4	4	6	6	4	3	4	4	16	10	6	21	6	12	164	9	9	26	9	3	10	3	3	6	3	7	9	117	11
d__Bacteria|p__Proteobacteria|c__Gammaproteobacteria|o__Enterobacterales|f__Enterobacteriaceae|g__Klebsiella	2	1	0	2	2	0	0	0	2	1	1	5	5	0	0	0	3	0	2	1	1	8	2	1	1	1	0	3	0	0	4	1	0	0	19	1	0	3	0	0	3	3	0	0	0	1	1	1	1
d__Bacteria|p__Proteobacteria|c__Gammaproteobacteria|o__Enterobacterales|f__Enterobacteriaceae|g__Klebsiella|s__Klebsiella pneumoniae	3	0	1	5	4	2	0	4	3	2	7	4	3	3	3	0	1	1	0	0	1	2	1	0	0	3	1	5	5	0	1	6	1	2	6	2	1	4	1	2	4	1	0	0	0	4	1	7	1
d__Bacteria|p__Proteobacteria|c__Gammaproteobacteria|o__Enterobacterales|f__Enterobacteriaceae|g__Pluralibacter|s__Pluralibacter gergoviae	3	0	0	1	0	0	0	0	0	0	1	0	0	0	0	0	3	0	0	0	0	0	0	0	0	0	0	0	1	0	1	1	0	0	2	0	0	0	0	0	1	0	0	1	2	0	0	0	0
d__Bacteria|p__Proteobacteria|c__Gammaproteobacteria|o__Oceanospirillales	158816	125256	155793	2239	42043	19312	15071	11525	157878	497847	5233	51975	127929	4141	10477	175	6439	206356	28727	2560	3989	21233	12226	1645	7212	7174	18974	15700	99	22013	2346	10903	204	142263	71	267	1518	4152	3	18	461	10	20	26	55	353825	66110	71695	147180
d__Bacteria|p__Proteobacteria|c__Gammaproteobacteria|o__Oceanospirillales|f__Alcanivoracaceae|g__Alcanivorax|s__Alcanivorax sp. N3-2A	1247	959	1778	15	329	127	108	88	1262	4116	31	386	980	45	115	1	67	2014	306	34	37	182	110	15	70	82	156	139	4	200	17	100	3	1259	0	4	19	42	0	0	3	0	0	1	0	3731	656	680	1566
d__Bacteria|p__Proteobacteria|c__Gammaproteobacteria|o__Oceanospirillales|f__Halomonadaceae|g__Halomonas|s__Halomonas sp. N3-2A	2521	2142	3525	53	703	311	228	189	2301	8832	70	746	1959	95	216	7	128	4646	625	56	99	427	275	38	150	126	425	273	2	453	39	220	5	2617	0	6	34	66	0	0	7	0	1	0	1	7847	1395	1488	3158
d__Bacteria|p__Proteobacteria|c__Gammaproteobacteria|o__Pseudomonadales|f__Moraxellaceae|g__Acinetobacter	12	5	0	13	4	7	3	3	6	15	15	25	6	6	2	10	2	4	3	2	4	12	0	3	1	0	0	5	2	4	2	5	7	10	51	1	3	10	0	3	26	6	1	6	0	0	4	3	1
d__Bacteria|p__Proteobacteria|c__Gammaproteobacteria|o__Pseudomonadales|f__Moraxellaceae|g__Acinetobacter|s__Acinetobacter baumannii	4	0	0	0	3	0	0	0	0	2	6	1	2	0	1	7	1	3	1	0	0	0	2	1	2	0	0	3	1	1	0	2	0	4	15	1	1	2	1	2	4	0	0	0	0	1	1	1	0
d__Bacteria|p__Proteobacteria|c__Gammaproteobacteria|o__Pseudomonadales|f__Moraxellaceae|g__Acinetobacter|s__Acinetobacter junii	104	6	0	60	26	54	22	26	19	68	104	96	62	28	7	95	29	32	4	11	15	41	16	15	37	2	5	33	1	17	25	50	68	77	202	2	24	62	11	34	150	28	3	30	1	3	14	10	1
d__Bacteria|p__Proteobacteria|c__Gammaproteobacteria|o__Pseudomonadales|f__Pseudomonadaceae|g__Pseudomonas	14	12	10	19	4	12	12	4	13	2	8	12	5	4	5	5	12	6	5	2	3	17	5	7	5	3	5	10	10	6	8	10	6	8	21	1	7	26	4	9	7	11	2	3	6	7	10	9	6
d__Bacteria|p__Proteobacteria|c__Gammaproteobacteria|o__Pseudomonadales|f__Pseudomonadaceae|g__Pseudomonas|s__Pseudomonas sp. FDAARGOS_380	16	5	11	13	5	11	7	9	11	9	17	11	10	8	7	7	15	8	7	4	5	7	20	14	9	7	8	10	10	9	7	15	16	14	29	5	9	51	8	12	8	44	9	18	6	8	13	22	18
d__Bacteria|p__Proteobacteria|c__Gammaproteobacteria|o__Xanthomonadales|f__Xanthomonadaceae|g__Stenotrophomonas|s__Stenotrophomonas maltophilia	0	4	2	1	0	3	1	1	10	1	7	0	1	3	3	0	0	0	0	0	0	5	0	0	1	0	0	2	2	2	0	4	0	3	10	3	1	6	0	2	3	0	0	0	0	0	0	0	3
d__Bacteria|p__Proteobacteria|c__Gammaproteobacteria|o__Xanthomonadales|f__Xanthomonadaceae|g__Xanthomonas|s__Xanthomonas euvesicatoria	256	0	0	0	1	2	1	0	4	1	0	321	3	0	0	0	0	0	21	0	0	0	0	0	0	0	1	0	0	83	2	0	3	0	101	0	1	0	0	15	1	1	0	0	1	0	50	0	0
d__Bacteria|p__Spirochaetes|c__Spirochaetia|o__Spirochaetales|f__Spirochaetaceae|g__Treponema|s__Treponema succinifaciens	33	33	11	108	7	120	54	38	118	39	116	137	56	57	39	6	11	30	2	9	53	15	9	16	53	122	103	109	203	144	11	32	21	17	4	5	0	22	25	6	52	0	6	8	24	6	17	14	6
d__Bacteria|p__Synergistetes|c__Synergistia|o__Synergistales|f__Synergistaceae|g__Cloacibacillus|s__Cloacibacillus porcorum	71	28	17	304	21	81	38	54	71	13	33	86	53	85	17	9	9	44	4	31	18	10	12	27	12	50	33	85	69	22	50	77	268	140	29	7	31	25	44	22	83	108	9	10	42	95	137	79	38
d__Bacteria|p__Tenericutes	16	23	7	10	5	18	24	13	16	7	8	12	7	6	4	1	1	11	1	2	5	1	7	1	2	4	4	13	4	1	15	17	20	30	6	10	49	92	8	5	35	7	5	0	7	53	30	26	24
d__Bacteria|p__Tenericutes|c__Mollicutes|o__Mycoplasmatales|f__Mycoplasmataceae|g__Mycoplasma	12	20	2	13	5	8	57	43	25	7	4	7	8	7	4	0	1	6	1	1	3	8	6	5	1	8	3	10	7	3	9	57	5	77	2	30	56	124	19	2	79	13	8	4	29	68	38	34	22
d__Bacteria|p__Verrucomicrobia|c__Verrucomicrobiae|o__Verrucomicrobiales|f__Akkermansiaceae|g__Akkermansia	3	4	0	1	1	24	111	49	100	10	27	7	23	85	6	0	0	3	0	0	2	6	6	24	4	9	1	1	15	1	195	79	38	50	18	100	78	130	35	6	350	71	29	25	64	282	34	143	149
d__Bacteria|p__Verrucomicrobia|c__Verrucomicrobiae|o__Verrucomicrobiales|f__Akkermansiaceae|g__Akkermansia|s__Akkermansia muciniphila	60	100	42	14	73	4155	24491	10598	27706	2410	6548	888	4678	49084	1108	98	45	46	24	38	1368	12417	25065	82353	4573	1216	160	420	3105	1432	84442	30772	9264	6798	69858	42019	58401	68725	13701	34695	133656	173490	112539	45113	136191	52629	15563	129989	99945
d__Viruses	11	51	23	7	81	5	204	37	25	15	30	9	5	4	11	8	51	43	16	8	1	9	17	14	2	16	3	8	18	28	23	39	4	10	228	18	19	51	5	7	68	18	22	20	4	78	7	589	11
d__Viruses|o__Caudovirales|f__Siphoviridae	2	33	6	3	59	0	3	30	1	0	26	2	0	3	1	8	26	18	5	7	1	0	5	10	0	11	3	5	10	22	1	15	4	1	14	12	11	26	2	4	58	15	20	12	2	64	1	47	0
d__Viruses|o__Caudovirales|f__Siphoviridae|s__Lactobacillus prophage Lj771	0	31	4	3	59	0	2	30	0	0	25	2	0	1	1	8	25	17	4	7	0	0	5	10	0	11	3	5	9	21	1	13	4	1	11	12	11	26	2	4	57	15	20	12	2	64	1	46	0
[truncated: 11 more columns]

## Sheet: TableS5
Table S5. Differential accumulation analysis results (with DESeq2) for shotgun metagenomics in control animals. Comparison: start vs end timepoints. Only statistically different results are shown (corrected p < 0.05).
geneName	baseMean	log2FoldChange	lfcSE	stat	pvalue	padj
d__Bacteria|p__Bacteroidetes|c__Bacteroidia|o__Bacteroidales|f__Prevotellaceae|g__Prevotella|s__Prevotella scopos	26.4738	3.31891	0.64783	16.8795	3.98287e-05	0.00493876
d__Bacteria|p__Firmicutes|c__Bacilli|o__Bacillales|f__Staphylococcaceae	17.6436	-4.38214	0.649605	40.5827	1.88468e-10	4.674e-08

## Sheet: TableS6
Table S6. Differential accumulation analysis results (with DESeq2) for shotgun metagenomics in DSS-treated animals. Comparison: start vs end timepoints. Only statistically different results are shown (corrected p < 0.05).
geneName	baseMean	log2FoldChange	lfcSE	stat	pvalue	padj
d__Bacteria|p__Proteobacteria|c__Gammaproteobacteria|o__Oceanospirillales|f__Halomonadaceae|g__Halomonas|s__Halomonas sp. N3-2A	811.577	5.9297	0.832712	28.471	9.51114e-08	3.63262e-06
d__Bacteria|p__Proteobacteria|c__Gammaproteobacteria|o__Oceanospirillales	38940.8	5.85175	0.741875	33.3622	7.64982e-09	3.64131e-07
d__Bacteria|p__Proteobacteria|c__Gammaproteobacteria|o__Oceanospirillales|f__Alcanivoracaceae|g__Alcanivorax|s__Alcanivorax sp. N3-2A	383.526	5.5949	0.842643	26.7676	2.29454e-07	6.82625e-06
d__Bacteria|p__Bacteroidetes|c__Bacteroidia|o__Bacteroidales|f__Porphyromonadaceae|g__Fermentimonas|s__Fermentimonas caenicola	54.2001	3.67484	0.645325	17.8784	2.35474e-05	0.000280214
d__Bacteria|p__Bacteroidetes|c__Bacteroidia|o__Bacteroidales|f__Bacteroidaceae|g__Bacteroides|s__Bacteroides caccae	29.7873	1.86509	0.590076	6.47267	0.0109546	0.0465571
d__Bacteria|p__Bacteroidetes|c__Bacteroidia|o__Bacteroidales|f__Bacteroidaceae|g__Bacteroides|s__Bacteroides caecimuris	16456	1.79041	0.476635	10.8893	0.00096721	0.00697563
d__Bacteria|p__Firmicutes|c__Bacilli|o__Bacillales|f__Paenibacillaceae|g__Paenibacillus|s__Paenibacillus polymyxa	19.5271	1.56677	0.314307	23.9638	9.8165e-07	2.33633e-05
d__Bacteria|p__Bacteroidetes|c__Bacteroidia|o__Bacteroidales|f__Prevotellaceae|g__Prevotella|s__Prevotella denticola	149.646	1.55609	0.508608	8.08575	0.00446145	0.0212365
d__Bacteria|p__Firmicutes|c__Clostridia|o__Clostridiales|f__Ruminococcaceae|g__Ruminococcus|s__Ruminococcus champanellensis	226.438	1.48809	0.315844	17.9777	2.2351e-05	0.000279976
d__Bacteria|p__Bacteroidetes|c__Bacteroidia|o__Bacteroidales|f__Prevotellaceae|g__Prevotella	168.742	1.45471	0.406185	10.2843	0.00134166	0.00912332
d__Bacteria|p__Firmicutes|c__Clostridia|o__Clostridiales|f__Clostridiaceae|g__Alkaliphilus|s__Alkaliphilus metalliredigens	24.3915	1.39653	0.385054	12.766	0.000352972	0.00292021
d__Bacteria|p__Bacteroidetes|c__Bacteroidia|o__Bacteroidales|f__Tannerellaceae|g__Tannerella|s__Tannerella sp. oral taxon HOT-286	14.5663	1.34487	0.416473	9.89437	0.00165785	0.0103834
d__Bacteria|p__Bacteroidetes|c__Bacteroidia|o__Bacteroidales|f__Prevotellaceae|g__Prevotella|s__Prevotella fusca	276.878	1.28117	0.450931	7.00097	0.00814658	0.0352525
d__Bacteria|p__Firmicutes|c__Clostridia|o__Clostridiales|f__Eubacteriaceae|g__Eubacterium	42.224	1.08693	0.258447	17.2025	3.35999e-05	0.000347686
d__Bacteria|p__Bacteroidetes|c__Bacteroidia|o__Bacteroidales|f__Bacteroidaceae|g__Bacteroides	315.062	1.07946	0.354999	8.17945	0.00423676	0.0212365
d__Bacteria|p__Bacteroidetes|c__Bacteroidia|o__Bacteroidales|f__Rikenellaceae|g__Mucinivorans|s__Mucinivorans hirudinis	20.6307	1.06975	0.370474	7.95715	0.00478977	0.0223523
d__Bacteria|p__Firmicutes|c__Clostridia|o__Clostridiales|f__Peptostreptococcaceae|g__Filifactor|s__Filifactor alocis	150.846	1.06425	0.285322	12.751	0.000355824	0.00292021
d__Bacteria|p__Bacteroidetes|c__Bacteroidia|o__Bacteroidales|g__Candidatus Azobacteroides|s__Candidatus Azobacteroides pseudotrichonymphae	215.784	1.04055	0.382031	6.40079	0.0114069	0.0476289
d__Bacteria|p__Firmicutes|c__Clostridia|o__Clostridiales|f__Eubacteriaceae|g__Acetobacterium|s__Acetobacterium woodii	10.1516	1.03837	0.382527	7.42463	0.00643372	0.0288911
d__Bacteria|p__Verrucomicrobia|c__Verrucomicrobiae|o__Verrucomicrobiales|f__Akkermansiaceae|g__Akkermansia	123.519	1.02565	0.335183	8.9845	0.00272279	0.015035
d__Bacteria|p__Bacteroidetes|c__Bacteroidia|o__Bacteroidales|f__Bacteroidaceae|g__Bacteroides|s__Bacteroides salanitronis	342.055	0.993248	0.326999	8.1468	0.00431373	0.0212365
d__Bacteria|p__Firmicutes|c__Bacilli|o__Lactobacillales|f__Streptococcaceae|g__Lactococcus|s__Lactococcus piscium	11.6246	0.949462	0.329119	8.21983	0.0041435	0.0212365
d__Bacteria|p__Firmicutes|c__Clostridia|o__Clostridiales|f__Ruminococcaceae|g__Ruminococcus|s__Ruminococcus albus	14.2617	0.903825	0.281812	9.91254	0.00164156	0.0103834
d__Bacteria|p__Firmicutes|c__Clostridia|o__Clostridiales|f__Peptococcaceae|g__Desulfofarcimen|s__Desulfofarcimen acetoxidans	29.3402	0.878166	0.208664	17.7079	2.57553e-05	0.000291894
d__Bacteria|p__Proteobacteria|c__Gammaproteobacteria	45.0892	0.844275	0.227051	13.1515	0.000287283	0.00253234
d__Bacteria|p__Firmicutes|c__Clostridia|o__Clostridiales|f__Ruminococcaceae|g__Ruminococcus|s__Ruminococcus bicirculans	72.1832	0.760835	0.248225	9.01876	0.00267223	0.015035
d__Bacteria|p__Firmicutes|c__Clostridia|o__Clostridiales|f__Lachnospiraceae|g__Blautia|s__Blautia sp. N6H1-15	348.668	0.63345	0.207667	9.00961	0.00268563	0.015035
d__Bacteria|p__Firmicutes|c__Clostridia|o__Clostridiales|g__Intestinimonas|s__Intestinimonas butyriciproducens	424.768	-0.48815	0.181237	7.20564	0.00726749	0.0320308
d__Bacteria|p__Firmicutes|c__Clostridia|o__Clostridiales|f__Lachnospiraceae|s__[Eubacterium] rectale	282.881	-0.524862	0.182429	8.09417	0.0044408	0.0212365
d__Bacteria|p__Firmicutes|c__Clostridia|o__Clostridiales|f__Christensenellaceae|g__Christensenella|s__Christensenella massiliensis	42.6479	-0.537357	0.167924	10.1006	0.0014822	0.00979897
d__Bacteria|p__Firmicutes	1433.89	-0.559454	0.159231	12.1662	0.00048664	0.00386068
d__Bacteria|p__Firmicutes|c__Clostridia|o__Clostridiales|f__Peptostreptococcaceae|g__Clostridioides|s__Clostridioides difficile	337.699	-0.712459	0.247104	8.11213	0.004397	0.0212365
d__Bacteria|p__Firmicutes|c__Clostridia|o__Clostridiales|f__Clostridiaceae|g__Clostridium|s__Clostridium sp. SY8519	456.773	-0.809305	0.233466	11.4945	0.000698041	0.00535916
d__Bacteria|p__Firmicutes|c__Clostridia|o__Clostridiales|f__Lachnospiraceae|g__Lachnoclostridium|s__Lachnoclostridium phocaeense	2831.66	-0.9063	0.266841	11.2767	0.000784869	0.00583746
d__Bacteria|p__Firmicutes|c__Clostridia|o__Clostridiales|f__Peptococcaceae|g__Desulfotomaculum|s__Desulfotomaculum nigrificans	9.26375	-0.941677	0.289136	10.6989	0.00107201	0.00750405
d__Bacteria|p__Firmicutes|c__Negativicutes|o__Veillonellales|f__Veillonellaceae|g__Megasphaera|s__Megasphaera sp. AJH120	21.053	-0.990025	0.32439	9.25123	0.00235338	0.0140026
d__Bacteria|p__Firmicutes|c__Clostridia|o__Clostridiales|f__Clostridiaceae|g__Clostridium|s__Clostridium chauvoei	39.8086	-1.04672	0.338362	8.94679	0.00277957	0.015035
d__Bacteria|p__Firmicutes|c__Bacilli|o__Bacillales|f__Staphylococcaceae|g__Staphylococcus|s__Staphylococcus aureus	64.2524	-1.12292	0.256582	18.7453	1.49395e-05	0.000209152
d__Bacteria|p__Firmicutes|c__Clostridia|o__Clostridiales|f__Lachnospiraceae|g__Lachnoclostridium|s__Lachnoclostridium sp. YL32	9627.93	-1.16258	0.251154	20.6299	5.57179e-06	0.000110507
d__Bacteria|p__Firmicutes|c__Clostridia|o__Clostridiales|f__Lachnospiraceae|g__Cellulosilyticum|s__Cellulosilyticum lentocellum	70.4595	-1.17605	0.269242	18.3039	1.88326e-05	0.000249008
d__Bacteria|p__Firmicutes|c__Erysipelotrichia|o__Erysipelotrichales|f__Erysipelotrichaceae	728.596	-1.20835	0.239961	23.4889	1.2564e-06	2.71839e-05
d__Bacteria|p__Actinobacteria|c__Actinobacteria|o__Actinomycetales|f__Actinomycetaceae|g__Actinomyces|s__Actinomyces sp. oral taxon 414	8.62476	-1.26967	0.394424	9.59081	0.00195554	0.0119338
d__Bacteria|p__Firmicutes|c__Bacilli|o__Bacillales|f__Staphylococcaceae|g__Staphylococcus|s__Staphylococcus xylosus	26.3718	-1.41875	0.489669	7.91691	0.00489749	0.0224154
d__Bacteria|p__Firmicutes|c__Bacilli|o__Bacillales|f__Staphylococcaceae|g__Staphylococcus|s__Staphylococcus epidermidis	69.6797	-1.42704	0.321462	17.5755	2.76129e-05	0.000298721
d__Bacteria|p__Firmicutes|c__Bacilli|o__Bacillales|f__Paenibacillaceae|g__Paenibacillus|s__Paenibacillus sp. FSL R7-0273	84.7388	-1.60735	0.352194	19.5804	9.64518e-06	0.000158106
d__Bacteria|p__Firmicutes|c__Clostridia|o__Clostridiales|f__Peptococcaceae|g__Desulfotomaculum	49.7492	-1.69821	0.401807	15.3679	8.84785e-05	0.000842315
d__Bacteria|p__Firmicutes|c__Erysipelotrichia|o__Erysipelotrichales|f__Erysipelotrichaceae|g__Erysipelatoclostridium|s__[Clostridium] innocuum	9.34896	-1.76331	0.39259	19.0972	1.24225e-05	0.000184785
d__Bacteria|p__Chrysiogenetes|c__Chrysiogenetes|o__Chrysiogenales|f__Chrysiogenaceae|g__Desulfurispirillum|s__Desulfurispirillum indicum	5.70109	-2.27229	0.43224	28.2459	1.06842e-07	3.63262e-06
d__Bacteria|p__Proteobacteria|c__Gammaproteobacteria|o__Pseudomonadales|f__Moraxellaceae|g__Acinetobacter|s__Acinetobacter junii	39.3058	-2.47044	0.557574	14.4128	0.000146805	0.00134383
d__Bacteria|p__Proteobacteria|c__Deltaproteobacteria|o__Desulfovibrionales	5.64689	-3.13189	0.592325	25.8143	3.75898e-07	9.94041e-06
d__Bacteria|p__Firmicutes|c__Clostridia|o__Clostridiales|f__Peptococcaceae|g__Desulfosporosinus|s__Desulfosporosinus orientis	3.02863	-3.14183	0.679696	19.5182	9.96465e-06	0.000158106
d__Bacteria|p__Firmicutes|c__Negativicutes|o__Acidaminococcales|f__Acidaminococcaceae|g__Acidaminococcus|s__Acidaminococcus intestini	17.2439	-3.67163	0.669443	19.8271	8.47721e-06	0.000155198
d__Bacteria|p__Firmicutes|c__Bacilli|o__Bacillales|f__Staphylococcaceae	25.6471	-4.28881	0.551343	48.5024	3.29883e-12	1.96281e-10
d__Bacteria|p__Firmicutes|c__Bacilli|o__Bacillales|f__Staphylococcaceae|g__Staphylococcus|s__Staphylococcus hominis	18.9909	-4.29781	0.904486	16.5202	4.81345e-05	0.000477334
d__Bacteria|p__Firmicutes|c__Bacilli|o__Bacillales|f__Staphylococcaceae|g__Staphylococcus	111.681	-4.45819	0.439169	76.8532	1.84152e-18	2.19141e-16
d__Bacteria|p__Firmicutes|c__Bacilli|o__Bacillales|f__Staphylococcaceae|g__Staphylococcus|s__Staphylococcus haemolyticus	78.3335	-6.19109	0.686707	55.1278	1.12944e-13	8.96021e-12
d__Bacteria|p__Firmicutes|c__Bacilli|o__Bacillales|f__Staphylococcaceae|g__Staphylococcus|s__Staphylococcus nepalensis	1476.15	-7.9276	0.586904	94.1977	2.8553e-22	6.79561e-20

## Sheet: TableS7
Table S7. Differential accumulation analysis results (with DESeq2) for metatranscriptomics data in control animals. Comparison: start vs end timepoints. Only statistically different results are shown (corrected p < 0.05).
KEGG KO	baseMean	log2FoldChange	lfcSE	stat	pvalue	padj
K01835: phosphoglucomutase [EC:5.4.2.2]	397.522	2.1948	0.577812	3.79847	0.000145593	0.0515399

## Sheet: TableS8
Table S8. Differential accumulation analysis results (with DESeq2) for metatranscriptomics data in DSS-treated animals. Comparison: start vs end timepoints. Only statistically different results are shown (corrected p < 0.05).
KEGG KO	baseMean	log2FoldChange	lfcSE	stat	pvalue	padj
K03978: GTP-binding protein	5.33361	5.64142	1.36682	4.12739	3.66896e-05	0.0074113
K11050: multidrug/hemolysin transport system ATP-binding protein	4.67375	5.44088	1.81445	2.99863	0.00271193	0.0842784
K01424: L-asparaginase [EC:3.5.1.1]	7.79844	5.41103	1.18915	4.55034	5.35599e-06	0.00216382
K03101: signal peptidase II [EC:3.4.23.36]	4.14942	5.27008	1.7201	3.06382	0.00218529	0.0842784
K01142: exodeoxyribonuclease III [EC:3.1.11.2]	35.279	3.38527	0.885688	3.82219	0.000132272	0.0178126
K02834: ribosome-binding factor A	456.18	1.83112	0.593	3.0879	0.00201579	0.0842784
K18941: two-component system, OmpR family, response regulator ArlR	16.9317	1.79387	0.597679	3.0014	0.0026874	0.0842784
K02959: small subunit ribosomal protein S16	62.7407	1.61099	0.531229	3.03258	0.00242476	0.0842784
K02906: large subunit ribosomal protein L3	71.4696	-1.87078	0.585026	-3.19777	0.00138494	0.0799309
K02946: small subunit ribosomal protein S10	189.638	-2.58805	0.756161	-3.42261	0.00062022	0.0504416
K02961: small subunit ribosomal protein S17	308.938	-4.24786	1.34904	-3.1488	0.00163942	0.0827906
K02787: PTS system, lactose-specific IIB component [EC:2.7.1.207]	24.6054	-4.86737	1.44392	-3.37094	0.000749132	0.0504416
K02788: PTS system, lactose-specific IIC component	24.6054	-4.86737	1.44392	-3.37094	0.000749132	0.0504416
